# Supplementary material for: Abnormal NHC ruthenium catalysts: mechanistic investigations of their preparation and steric influence on catalytic performance
Source: Royal Society of Chemistry journal article supplement (doi:10.1039/d2cy01036d), 2022-01-01
Supplement: d2cy01036d1.pdf [file d2cy01036d1.pdf]

## Supporting Information

### Abnormal NHC Ruthenium Catalysts: Mechanistic Investigations of their Preparation and Steric Influence on Catalytic Performance

Alexander D. Böth,<sup>1</sup> Michael J. Sauer,<sup>1</sup> Walter Baratta\*<sup>2</sup> and Fritz E. Kühn\*<sup>1</sup>

\*Corresponding authors, walter.baratta@uniud.it, fritz.kuehn@ch.tum.de

<sup>1</sup>Technische Universität München, Catalysis Research Center and Department of Chemistry, Professorship of Molecular Catalysis, Lichtenbergstr. 4, 85748 Garching b. München, Germany

<sup>2</sup>Università di Udine, Dipartimento DI4A, Via Cotonificio 108, 33100 Udine, Italy

#### Abstract

The bis-abnormal *N*-heterocyclic carbene (aNHC) ruthenium complexes [Ru(OAc)(aNHC-ethyl-PPh<sub>2</sub>)<sub>2</sub>]Br **1** and **3** are obtained from Ru(OAc)<sub>2</sub>(PPh<sub>3</sub>)<sub>2</sub> with the ligands 1-(2-diphenylphosphino-ethyl)-3-aryl-imidazolium bromide (aryl = phenyl, di-*iso*-propylphenyl) L<sup>Ph</sup> and L<sup>DiPP</sup> in THF at 60 °C and in the presence of NaOAc *via* displacement of PPh<sub>3</sub> and carbene deprotonation. Mechanistic studies on the formation of the di-*iso*-propylphenyl derivative **3** reveal the preceding generation of mono-aNHC intermediate isomers **3a** and **3b** as kinetic and thermodynamic products. Complexes **1** and **3** exhibit exceptionally high activity in the transfer hydrogenation (TH) of acetophenone and *Oppenauer*-type oxidation of  $\alpha$ -tetralol, **1** showing turn-over frequencies (TOF) of up to 550 000 h<sup>-1</sup> in the TH of acetophenone and **3** showing TOFs up to 280 000 h<sup>-1</sup> in the *Oppenauer*-type oxidation of  $\alpha$ -tetralol. The comparison of the catalytic activity of the phenyl **1**, mesityl **2** and di-*iso*-propylphenyl **3** complexes follows the order **1** > **2** > **3** for TH, likely due to accessibility of the active center, whilst following the inverse **3** > **2** > **1** order in *Oppenauer*-type oxidation. This inversion appears to be dependent on steric influences. These observations are in line with buried volume calculations based on density functional theory (DFT) optimized structures.

**KEYWORDS:** *N*-heterocyclic carbenes, Ruthenium, Transfer Hydrogenation, *Oppenauer*-type Oxidation

## Table of Content

|                                                                         |    |
|-------------------------------------------------------------------------|----|
| General Remarks .....                                                   | 3  |
| Ligand Syntheses .....                                                  | 4  |
| Synthesis of L <sub>Ph</sub> .....                                      | 4  |
| Synthesis of L <sup>Dipp</sup> .....                                    | 8  |
| Complex Syntheses.....                                                  | 13 |
| Synthesis of 1.....                                                     | 13 |
| Synthesis of 3.....                                                     | 14 |
| Synthesis of 3a.....                                                    | 16 |
| NMR evidence of 3b .....                                                | 17 |
| NMR Spectra.....                                                        | 18 |
| Single Crystal X-Ray Structure Determination .....                      | 33 |
| General Procedure for Catalytic Transfer Hydrogenation Reactions .....  | 35 |
| General Procedure for Catalytic Oppenauer-type Oxidation Reactions..... | 35 |
| TOF Calculations .....                                                  | 35 |
| Catalytic Results .....                                                 | 36 |
| Transfer Hydrogenation .....                                            | 36 |
| Oppenauer-Type Oxidation .....                                          | 43 |
| DFT - Computational Structure Calculations.....                         | 47 |
| General Remarks .....                                                   | 47 |
| Coordinate Tables .....                                                 | 47 |
| Calculated Structures .....                                             | 63 |
| DFT - Buried Volume and Steric Map Calculations .....                   | 65 |
| General Remarks .....                                                   | 65 |
| Buried Volume Tables .....                                              | 67 |
| Steric Maps.....                                                        | 73 |
| Mechanisms .....                                                        | 75 |
| References.....                                                         | 77 |
| Author Contributions .....                                              | 78 |

## General Remarks

Unless otherwise specified, all reactions were performed under oxygen free, dry conditions in an argon atmosphere using standard Schlenk conditions and glovebox techniques. All solvents, unless described otherwise, were purified, degassed and dried according to standard purification techniques or obtained from a *M. Braun* SPS purification system. If not noted differently, all further chemicals were purchased from commercial sources and used as received. Substrates for catalysis were distilled prior to degassing.  $\text{Ru}(\text{OAc})_2(\text{PPh}_3)_2$  was prepared according to a literature method.<sup>1</sup> NMR spectra were acquired on a *Bruker* Avance Ultrashield 400 MHz and a *Bruker* DPX 400 MHz spectrometer. Data was processed with *Mestrelab* *Mestrenova* from *Mestrelab Research*. All  $^1\text{H}$  and  $^{13}\text{C}$  chemical shifts are reported in parts per million (ppm) relative to TMS, with the residual solvent peak serving as internal reference.  $^{31}\text{P}$  NMR spectra are referenced to 85%  $\text{H}_3\text{PO}_4$  as external standard. Single crystals were measured in the SC-XRD laboratory of the *Catalysis Research Center* at *Technische Universität München*. Electron spray ionization mass spectrometry (ESI-MS) was conducted on a Finnigan MAT SSQ 7000 (MS-EI, 70 eV; CI, 100 eV) equipped with a ThermoFisher Scientific LTQ Orbitrap XL. Liquid Injection Field Desorption Ionization Mass Spectrometry (LIFDI-MS) was measured directly from an inert atmosphere glovebox with a Thermo Fisher Scientific Exactive Plus Orbitrap equipped with an ion source from Linden CMS. GC analysis was performed with an *Agilent Technologies* 7890B GC system using an *Agilent* VF-200ms column (30 m  $\times$  250  $\mu\text{m}$   $\times$  0.25 $\mu\text{m}$ ). CHN analyses were carried out in the microanalytical laboratory at *Technische Universität München*.

## Ligand Syntheses

### Synthesis of L<sup>Ph</sup>

Ligand L<sup>Ph</sup> is prepared applying a similar synthetic pathway to the preparation of the mesityl and di-*isopropylphenyl* analogues (Scheme S1), albeit adapted regarding the workup procedures. *N*-phenylimidazole is chosen as starting point for the synthesis, as this is available commercially. Whilst L1 has merely been reported previously in correlation with a patent,<sup>2</sup> both L2 and L<sup>Ph</sup> represent novel compounds, to the best of our knowledge.

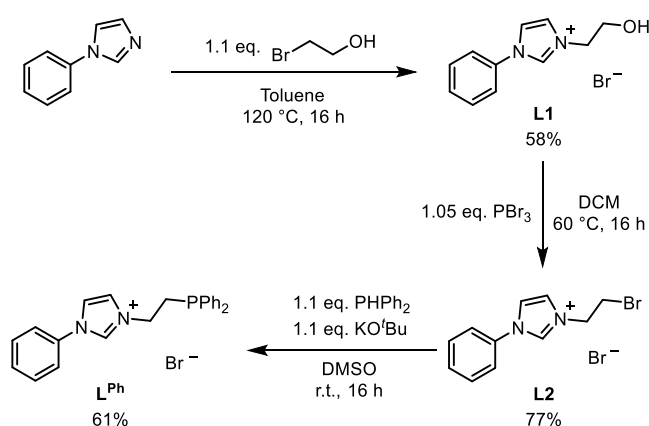

Scheme S1: Synthetic pathway for the preparation of L<sup>Ph</sup> from *N*-phenylimidazole.

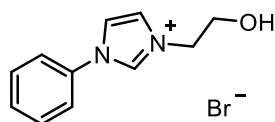

**L1**

C<sub>11</sub>H<sub>13</sub>BrN<sub>2</sub>O  
269.14 g/mol

*N*-phenylimidazole (6.84 g, 47.4 mmol, 1.00 eq.) is added to toluene (20.0 mL) at 60 °C. 2-Bromoethanol (6.53 g, 52.2 mmol, 1.10 eq.) is added slowly and the reaction mixture and stirred at 120 °C for 16 h. The work-up is performed under atmospheric conditions. The reaction mixture is cooled to r.t., the formed precipitate isolated and washed with toluene (3 x 10.0 mL) and diethylether (3 x 10.0 mL). Acetonitrile (15 mL) is added to the crude brown solid from which a white solid is consequently isolated by separation from the brown solution *via* filtration, yielding compound **L1** as a white solid (7.43 g, 27.5 mmol, 58%).

<sup>1</sup>H NMR (300 MHz, CD<sub>3</sub>OD, 300 K) δ [ppm] = 9.59 (s, 1H, NCHN), 8.14 (t, <sup>4</sup>J = 1.9 Hz, 1H, NCHCHN), 7.91 (t, <sup>4</sup>J = 1.9 Hz, 1H, NCHCHN), 7.82 - 7.59 (m, 5H, Ph), 4.47 (t, <sup>3</sup>J = 4.4 Hz, 2H, NCH<sub>2</sub>CH<sub>2</sub>O), 4.01 (t, <sup>3</sup>J = 4.0 Hz, 2H, NCH<sub>2</sub>CH<sub>2</sub>O).

<sup>13</sup>C NMR (101 MHz, CD<sub>3</sub>OD, 300 K) δ [ppm] = 136.9 (NCHN), 136.4, 131.5 (2C), 131.3, 125.0 (NCHCHN), 123.4 (2C), 122.8 (NCHCHN), 60.98 (NCH<sub>2</sub>CH<sub>2</sub>O), 53.81 (NCH<sub>2</sub>CH<sub>2</sub>O).

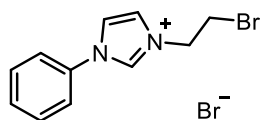

**L2**

C<sub>11</sub>H<sub>12</sub>Br<sub>2</sub>N<sub>2</sub>  
332.03 g/mol

Compound **L1** (4.84 g, 17.9 mmol, 1.00 eq.) is suspended in DCM (60 mL) and cooled to 0 °C. A solution of phosphorus tribromide (5.11 g, 18.9 mmol, 1.05 eq.) in DCM (20.0 mL) is added slowly, the reaction mixture heated to 60 °C and stirred for 16 h. The work-up is performed under atmospheric conditions. The solvent is removed under reduced pressure and methanol (20 mL) added. A yellow solid is removed *via* centrifugation and decanting, resulting in a clear solution. Addition of diethyl ether results in precipitation of a white solid. This is dissolved in methanol and filtered over a plug with basic aluminum oxide and consequently a PTFE whatman filter (0.2 μm). Removing of the solvent yields compound **L2** as a white solid (4.60 g, 13.9 mmol, 77%).

**ESI-MS** (EI, 70 eV): m/z (%) = 252 (100) [**L2**-Br<sup>-</sup>]<sup>+</sup>.

**<sup>1</sup>H NMR** (300 MHz, CD<sub>3</sub>OD, 300 K) δ [ppm] = 9.73 (t, <sup>4</sup>J = 1.4 Hz, 1H, NCHN), 8.18 (t, <sup>4</sup>J = 1.8 Hz, 1H, NCHCHN), 7.98 (t, <sup>4</sup>J = 1.8 Hz, 1H, NCHCHN), 7.81 - 7.73 (m, 2H, Ph), 7.73 - 7.61 (m, 3H, Ph), 4.81 (t, <sup>3</sup>J = 5.9 Hz, 2H, NCH<sub>2</sub>CH<sub>2</sub>Br), 3.99 (t, <sup>3</sup>J = 5.9 Hz, 2H, NCH<sub>2</sub>CH<sub>2</sub>Br).

**<sup>13</sup>C NMR** (101 MHz, CD<sub>3</sub>OD, 300 K) δ [ppm] = 137.1 (NCHN), 136.3, 131.6 (2C), 131.5, 124.7 (NCHCHN), 123.3 (2C), 123.1 (NCHCHN), 52.53 (NCH<sub>2</sub>CH<sub>2</sub>O), 30.67 (NCH<sub>2</sub>CH<sub>2</sub>O).

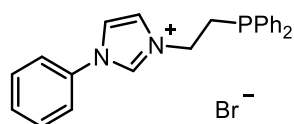

**L<sup>Ph</sup>**  
 $C_{23}H_{22}BrN_2P$   
 437.32 g/mol

Potassium *tert*-butoxide (1.64 g, 14.6 mmol, 1.10 eq.) and diphenylphosphine (2.72 g, 14.6 mmol, 1.10 eq.) are dissolved in dimethyl sulfoxide (40 mL) and slowly added to a solution of compound **L2** (4.41 g, 13.3 mmol, 1.00 eq.) in dimethyl sulfoxide (50 mL). The reaction mixture is stirred at 60 °C for 3 h. After removal of the solvent under reduced pressure ( $1 \cdot 10^{-3}$  mbar) at 90 °C the crude product is dissolved in DCM (20 mL), filtrated, concentrated to approximately 2.00 mL and precipitated with diethylether. After filtration and drying under reduced pressure compound **L<sup>Ph</sup>** is obtained as a white solid (3.55 g, 8.11 mmol, 61%).

**MS** (LIFDI):  $m/z$  (%): 357 (100) [**L<sup>Ph</sup>**-Br]<sup>+</sup>.

**<sup>1</sup>H NMR** (300 MHz, CD<sub>3</sub>OD, 300 K)  $\delta$  [ppm] = 11.25 (s, 1H, NCHN), 7.75 (t, <sup>4</sup> $J$  = 1.9 Hz, 1H, NCHCHN), 7.74 (t, <sup>4</sup> $J$  = 1.9 Hz, 1H, NCHCHN), 7.62 – 7.46 (m, 8H, Ph), 7.45 (t, <sup>4</sup> $J$  = 1.9 Hz, 1H, Ph), 7.38 – 7.27 (m, 6H, Ph), 4.69 (dt, <sup>2,3</sup> $J$  = 10.6, 7.3 Hz, 2H, NCH<sub>2</sub>CH<sub>2</sub>P), 2.95 (t, <sup>3</sup> $J$  = 7.3 Hz, 2H, NCH<sub>2</sub>CH<sub>2</sub>P).

**<sup>13</sup>C NMR** (101 MHz, CDCl<sub>3</sub>, 300 K)  $\delta$  [ppm] = 137.1, 137.0 (NCHN), 135.1, 133.5 (2C), 133.3 (2C), 131.0 (2C), 130.7, 129.7 (2C), 129.3 (2C), 129.2 (2C), 123.6, 123.5 (2C), 122.3, 120.4, 48.92 (d,  $J$  = 22.7 Hz, NCH<sub>2</sub>CH<sub>2</sub>P), 29.50 (d,  $J$  = 16.0 Hz, NCH<sub>2</sub>CH<sub>2</sub>P).

**<sup>31</sup>P NMR** (162 MHz, CD<sub>2</sub>Cl<sub>2</sub>, 300 K)  $\delta$  [ppm] = -21.4 (s, 1P).

## Synthesis of $L^{Dipp}$

Ligand  $L^{Dipp}$  was prepared applying a similar synthetic pathway to the preparation of the mesityl analogue (Scheme S2).<sup>3</sup> Analytical data is in agreement with that reported in literature.<sup>3d, 4</sup>

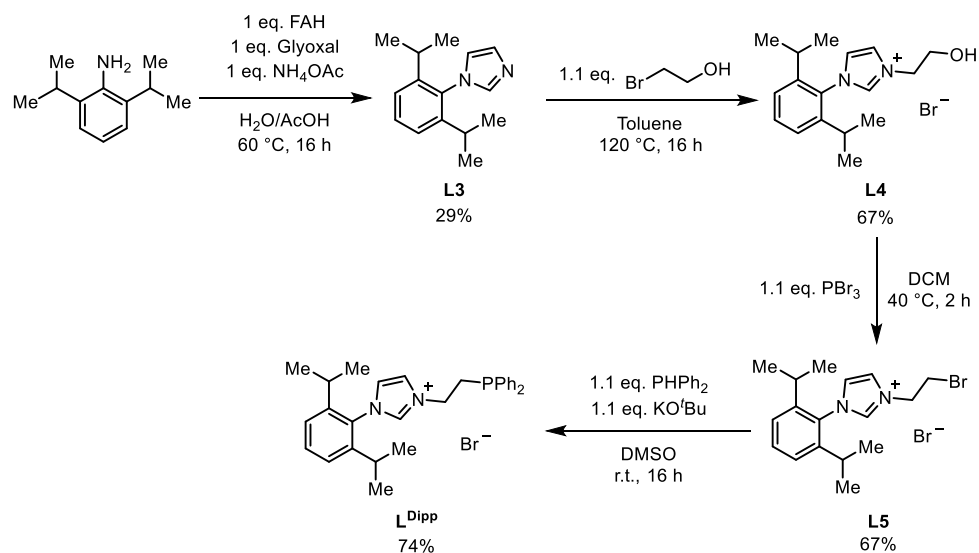

**Scheme S2:** Synthetic pathway for the preparation of  $L^{Dipp}$  from 2,6-di-isopropylaniline.



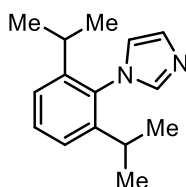

**L3**

$C_{15}H_{20}N_2$   
228.34 g/mol

A mixture of aqueous formaldehyde (37 wt.%, 18.3 g, 226 mmol, 1.00 eq.), aqueous glyoxal (40 wt.%, 30.5 g, 226 mmol, 1.00 eq.) and glacial acetic acid (80.0 mL) is heated to 70 °C under atmospheric conditions. A mixture of 2,6-di-*isopropyl*phenylaniline (40.0 g, 226 mmol, 1.00 eq.) and ammonium acetate (17.4 g, 226 mmol, 1.00 eq.) in water (16.0 mL) and glacial acetic acid (80.0 mL) is slowly added and the combined reaction mixture stirred overnight at 70 °C. After cooling to r.t. the solution is slowly neutralized with saturated  $NaHCO_3$  solution. The precipitating brown solid is isolated by filtration, dissolved in DCM (300 mL), added to a separatory funnel and the impurities extracted with water (10.0 mL). The organic layer is isolated and the aqueous layer extracted with DCM (3 x 50.0 mL). The solvent is evaporated under reduced pressure and the crude black product purified by sublimation (160 °C,  $5 \times 10^{-3}$  mbar), yielding compound **L3** as a white solid (15.0 g, 65.5 mmol, 29%).

$^1H$  NMR (400 MHz,  $CDCl_3$ , 300 K)  $\delta$  [ppm] = 7.46 (s, 1H, NCHN), 7.43 (t,  $^3J = 7.8$  Hz, 1H, NCHCHN), 7.25 (s, 1H, NCHCHN), 7.23 (s, 2H, Dipp<sub>meta</sub>), 6.93 (t,  $^4J = 1.2$  Hz, 1H, Dipp<sub>para</sub>), 2.39 (hept,  $^3J = 6.9$  Hz, 2H, Dipp<sub>CH<sub>3</sub>CHCH<sub>3</sub></sub>), 1.12 (d,  $^3J = 6.9$  Hz, 12H, Dipp<sub>Me</sub>).

$^{13}C$  NMR (101 MHz,  $CDCl_3$ , 300 K)  $\delta$  [ppm] = 146.7 (2C), 138.6 (NCHN), 133.0, 129.9 (NCHCHN), 129.5 (NCHCHN), 123.9 (2C), 121.7, 28.23 (2C), 24.56 (2C, Dipp<sub>Me</sub>), 24.48 (2C, Dipp<sub>Me</sub>).

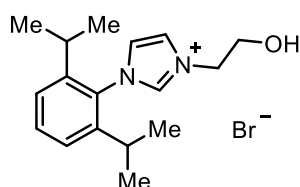

**L4**

$C_{17}H_{25}BrN_2O$   
353.30 g/mol

Compound **L3** (1.88 g, 8.23 mmol, 1.00 eq.) is dissolved in toluene (20.0 mL) at 60 °C. 2-Bromoethanol (1.13 g, 9.05 mmol, 1.10 eq.) is added slowly and the reaction mixture is stirred at 120 °C for 16 h. The work-up is performed under atmospheric conditions. The reaction mixture is cooled to r.t., the formed precipitate isolated and washed with toluene (3 x 10.0 mL) and diethylether (3 x 10.0 mL). The crude red-brown solid is dissolved in acetone (10.0 mL) and precipitated with diethylether (15.0 mL). Isolation and washing with diethylether (3 x 5.00 mL) yields compound **L4** as a white solid (2.31 g, 5.51 mmol, 67%).

**$^1H$  NMR** (400 MHz,  $CDCl_3$ , 300 K)  $\delta$  [ppm] = 8.56 (s, 1H, NCHN). 7.71 (t,  $^4J = 1.7$  Hz, 1H, NCHCHN), 7.56 (t,  $^3J = 7.8$  Hz, 1H, NCHCHN), 7.32 (d,  $^3J = 7.9$  Hz, 2H, Dipp<sub>meta</sub>), 7.21 (t,  $^4J = 1.8$  Hz, 1H, Dipp<sub>para</sub>), 4.56 (t,  $^3J = 4.9$  Hz, 2H,  $NCH_2CH_2P$ ), 4.03 (t,  $^3J = 4.9$  Hz, 2H,  $NCH_2CH_2P$ ), 2.69 (s, 1H, OH), 2.30 (hept,  $^3J = 6.5$  Hz, 2H, Dipp<sub>CH<sub>3</sub>CH<sub>3</sub></sub>), 1.17 (t,  $^3J = 6.4$  Hz, 12H, Dipp<sub>Me</sub>).

**$^{13}C$  NMR** (101 MHz,  $CDCl_3$ , 300 K)  $\delta$  [ppm] = 145.7 (2C), 137.1 (NCHN), 132.2, 130.0, 124.9 (2C), 124.5 (NCHCHN), 123.8 (NCHCHN), 60.62 ( $NCH_2CH_2O$ ), 52.61 ( $NCH_2CH_2O$ ), 28.75 (2C), 24.31 (2C, Dipp<sub>Me</sub>), 24.20 (2C, Dipp<sub>Me</sub>).

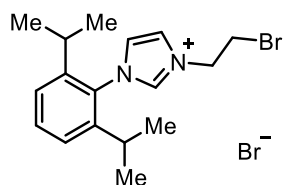

**L5**

$C_{17}H_{24}Br_2N_2$   
416.20 g/mol

Compound **L4** (1.99 g, 5.29 mmol, 1.00 eq.) is dissolved in DCM (15.0 mL) and cooled to 0 °C. A solution of phosphorus tribromide (2.17 g, 8.00 mmol, 1.10 eq.) in DCM (12.0 mL) is added slowly, the reaction mixture heated to 40 °C and stirred for 2 h. The work-up is performed under atmospheric conditions. After diluting with DCM (30.0 mL) the reaction mixture is slowly neutralized with sat.  $NaHCO_3$  (30.0 mL) solution in a separatory funnel. The organic phase is isolated and the aqueous phase extracted with DCM (3 x 30.0 mL). The combined organic phase is dried over  $MgSO_4$  and the solvent removed under reduced pressure, yielding compound **L5** as a white solid (1.47 g, 3.53 mmol, 67%).

**ESI-MS** (EI, 70 eV):  $m/z$  (%) = 336 (100) [**L5**- $Br^-$ ] $^+$ .

**$^1H$  NMR** (400 MHz,  $CDCl_3$ , 300 K)  $\delta$  [ppm] = 9.58 (t,  $^4J = 1.6$  Hz, 1H, NCHN), 8.24 (t,  $^4J = 1.7$  Hz, 1H, NCHCHN), 7.55 (t,  $^3J = 7.8$  Hz, 1H, NCHCHN), 7.32 (d,  $^3J = 7.8$  Hz, 2H, Dipp<sub>meta</sub>), 7.21 (t,  $^4J = 1.8$  Hz, 1H, Dipp<sub>para</sub>), 5.16 (t,  $^3J = 5.3$  Hz, 2H,  $NCH_2CH_2P$ ), 4.01 (t,  $^3J = 5.4$  Hz, 2H,  $NCH_2CH_2P$ ), 2.34 (hept,  $^3J = 6.8$  Hz, 2H, Dipp<sub>CH<sub>3</sub>CHCH<sub>3</sub></sub>), 1.19 (dd,  $^{2,3}J = 19.7, 6.8$  Hz, 12H, Dipp<sub>Me</sub>).

**$^{13}C$  NMR** (101 MHz,  $CDCl_3$ , 300 K)  $\delta$  [ppm] = 145.6 (2C), 137.9 (NCHN), 132.2, 130.0, 124.9 (2C), 124.3 (NCHCHN), 124.1 (NCHCHN), 53.57 ( $NCH_2CH_2Br$ ), 51.71 ( $NCH_2CH_2Br$ ), 32.02, 28.77, 24.47 (2C, Dipp<sub>Me</sub>), 24.32 (2C, Dipp<sub>Me</sub>).

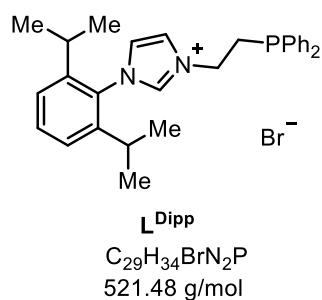

Potassium *tert*-butoxide (418 mg, 3.73 mmol, 1.10 eq.) and diphenylphosphine (694 mg, 3.73 mmol, 1.10 eq.) are dissolved in dimethyl sulfoxide (10.0 mL) and slowly added to a solution of compound **L5** (1.41 g, 3.39 mmol, 1.00 eq.) in dimethyl sulfoxide (10.0 mL). The reaction mixture is stirred at r.t. for 3 h. After removal of the solvent under reduced pressure ( $1 \cdot 10^{-3}$  mbar) at 90 °C the crude product is dissolved in DCM (6.00 mL), filtrated, concentrated to approximately 2.00 mL and precipitated with diethylether (5.00 mL). After filtration and drying under reduced pressure compound **L<sup>Dipp</sup>** is obtained as a white solid (1.31 g, 2.51 mmol, 74%).

**MS** (LIFDI):  $m/z$  (%): 441 (100) [**L<sup>Dipp</sup>**-Br]<sup>+</sup>.

**<sup>1</sup>H NMR** (400 MHz, CD<sub>2</sub>Cl<sub>2</sub>, 300 K)  $\delta$  [ppm] = 10.34 (s, 1H, NCHN), 7.81 (t, <sup>4</sup> $J$  = 1.7 Hz, 1H, NCHCHN), 7.58 (t, <sup>3</sup> $J$  = 7.9 Hz, 1H, NCHCHN), 7.54 - 7.47 (m, 5H, Ph), 7.44 - 7.37 (m, 5H, Ph), 7.35 (d, <sup>3</sup> $J$  = 7.9 Hz, 2H, Dipp<sub>meta</sub>), 7.17 (t, <sup>4</sup> $J$  = 1.8 Hz, 1H, Dipp<sub>para</sub>), 4.80 (dt, <sup>2,3</sup> $J$  = 11.0, 7.1 Hz, 2H, NCH<sub>2</sub>CH<sub>2</sub>P), 2.91 (t, <sup>3</sup> $J$  = 7.1 Hz, 2H, NCH<sub>2</sub>CH<sub>2</sub>P), 2.34 (hept, <sup>3</sup> $J$  = 6.6 Hz, 2H, Dipp<sub>CH<sub>3</sub>CHCH<sub>3</sub></sub>), 1.20 (dd, <sup>3</sup> $J$  = 35.7, 6.9 Hz, 12H, Dipp<sub>Me</sub>).

**<sup>13</sup>C NMR** (101 MHz, CDCl<sub>3</sub>, 300 K)  $\delta$  [ppm] = 146.1 (2C), 138.9 (NCHN), 136.9 (d,  $J$  = 11.4 Hz, 2C) 133.5 (2C), 133.3 (2C), 132.4, 129.9 (2C), 129.5 (2C), 129.4 (2C), 125.3 (3C), 124.6 (NCHCHN), 123.9 (NCHCHN), 48.70 (d,  $J$  = 21.2 Hz, NCH<sub>2</sub>CH<sub>2</sub>P), 30.25 (d,  $J$  = 15.4 Hz, NCH<sub>2</sub>CH<sub>2</sub>P), 29.22 (2C), 24.72 (2C, Dipp<sub>Me</sub>), 24.52 (2C, Dipp<sub>Me</sub>).

**<sup>31</sup>P NMR** (162 MHz, CD<sub>2</sub>Cl<sub>2</sub>, 300 K)  $\delta$  [ppm] = -23.8 (s, 1P).

## Complex Syntheses

### Synthesis of 1

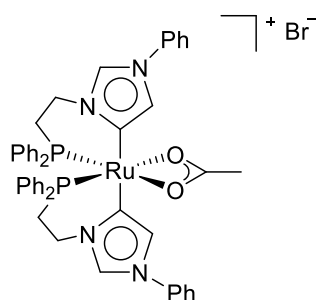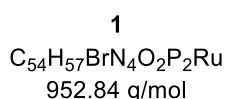

$Ru(OAc)_2(PPh_3)_2$  (500 mg, 670  $\mu$ mol, 1.00 eq),  $L^{Ph}$  (603 mg, 1.38 mmol, 2.05 eq) and anhydrous NaOAc (113 mg, 1.38 mmol, 2.05 eq) are dissolved in THF (90 mL) and stirred for 4 h at 60 °C. The precipitating black and yellow solids are dispersed in the THF by vigorous stirring. After termination of stirring, the yellow solid is transferred to a new Schlenk-flask *via* a cannula as dispersion in THF, whilst the black solid mostly remains at the reaction flask wall. The solvent is removed under reduced pressure and the residue dissolved in DCM (10 mL). The solution is filtered off *via* a whatman-filtration; precipitation is performed by addition of Et<sub>2</sub>O. The residual black precipitate is separated from the yellow precipitate applying the above technique, repeated until no black residue remained. The solution is filtered off *via* a whatman-filtration and the residual yellow solid washed with Et<sub>2</sub>O (10 mL) and *n*-pentane (10 mL). Product **1** is obtained as a yellow powder (0.20 g, 0.21 mmol, 31%).

**Elemental analysis** calcd (%) for  $C_{48}H_{45}BrN_4O_2P_2Ru$ : C, 60.51; H, 4.76; N, 5.88. Found: C, 60.01; H, 4.72; N, 5.77.

**MS** (LIFDI):  $m/z$  (%): 873.2 (100) [**1**-Br]<sup>+</sup>.

**<sup>1</sup>H NMR** (400 MHz, CD<sub>2</sub>Cl<sub>2</sub>, 300 K):  $\delta$  9.38 (d, <sup>4</sup> $J$  = 1.9 Hz, 2 H, NC<sub>4</sub>H<sub>4</sub>N), 7.81 (m, 4 H, Ph<sub>ortho</sub>), 7.47 (m, 12 H, Ph<sub>meta/para</sub>), 7.38 (m, 2H, Ph<sub>meta/para</sub>), 7.31 (m, 4 H, Ph<sub>meta/para</sub>), 7.18 (m, 4H, Ph<sub>meta/para</sub>), 7.05 (d, <sup>4</sup> $J$  = 1.8 Hz, 2 H, NC<sub>4</sub>H<sub>4</sub>N), 6.47 (m, 4 H, Ph<sub>ortho</sub>), 5.58 (m, 2 H, NCH<sub>2</sub>CH<sub>2</sub>P), 3.98 (m, 2 H, NCH<sub>2</sub>CH<sub>2</sub>P), 1.92 (s, 3 H, OAc<sub>Me</sub>), 1.89 (m, 2 H, NCH<sub>2</sub>CH<sub>2</sub>P), 1.36 (m, 2H, NCH<sub>2</sub>CH<sub>2</sub>P).

**<sup>13</sup>C NMR** (125 MHz, CD<sub>2</sub>Cl<sub>2</sub>, 300 K):  $\delta$  184.7 (s, OAc), 165.3 (s, NC<sub>4</sub>H<sub>4</sub>N), 138.4-138.0 (m, Ph<sub>quart</sub>), 136.5 (s, NCN), 134.1 (t, <sup>3</sup> $J_{CP}$  = 4.6 Hz), 133.6 (s), 132.1 (s, br), 130.6 (s), 130.2 (s), 130.0 (s), 129.2 (s), 128.7 (t, <sup>3</sup> $J_{CP}$  = 3.8 Hz), 128.4 (t, <sup>3</sup> $J_{CP}$  = 4.2 Hz), 124.3 (s), 121.9 (s), 46.1 (s, NCH<sub>2</sub>CH<sub>2</sub>P), 25.9 (s), 25.7 (t, <sup>3</sup> $J_{CP}$  = 6.4 Hz, NCH<sub>2</sub>CH<sub>2</sub>P).

**<sup>31</sup>P NMR** (162 MHz, CD<sub>2</sub>Cl<sub>2</sub>, 300 K):  $\delta$  55.8 (s).

## Synthesis of **3**

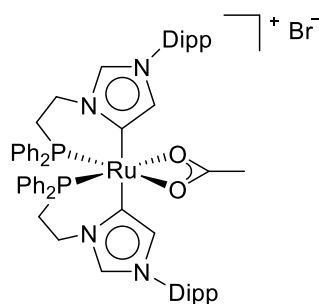

**3**

$C_{60}H_{69}BrN_4O_2P_2Ru$   
1121.16 g/mol

### 1) Method from $Ru(OAc)_2(PPh_3)_2$

$Ru(OAc)_2(PPh_3)_2$  (4.70 g, 6.32 mmol, 1.00 eq),  $L^{Dipp}$  (6.75 g, 12.9 mmol, 2.05 eq) and anhydrous NaOAc (1.04 g, 12.6 mmol, 2.00 eq) are dissolved in THF (100 mL) and stirred for 6 h at 60 °C. The solvent is removed under reduced pressure and the residue dissolved in DCM (25 mL). The solution is filtered off *via* a whatman-filtration; fractionated precipitation is performed by addition of  $Et_2O$  and the resulting solid washed with *n*-hexane (30 mL). Product **3** is obtained as a yellow powder (5.74 g, 5.12 mmol, 81%).

### 2) Method from Compound **3b**

Compound **3b** (1.50 g, 1.25 mmol, 1 eq) and anhydrous NaOAc (205 mg, 2.5 mmol, 2.00 eq) are dissolved in THF (50 mL) and stirred for 6 h at 60 °C. The resulting precipitate is isolated *via* a whatman-filtration, washed with THF (5 mL) and dissolved in DCM (10 mL). The yellow solution is filtered off, the solvent removed under reduced pressure and the resulting solid washed with *n*-hexane (10 mL). Product **3** is obtained as a yellow powder (1.18 g, 1.05 mmol, 84%).

**Elemental analysis** calcd (%) for  $C_{60}H_{69}BrN_4O_2P_2Ru$ : C, 64.28; H, 6.20; N, 5.00. Found: C, 62.93; H, 6.33; N, 4.94.

**MS** (LIFDI):  $m/z$  (%): 1041.3 (100) [**3**-Br]<sup>+</sup>.

**<sup>1</sup>H NMR** (400 MHz,  $CD_2Cl_2$ , 300 K):  $\delta$  8.59 (d,  $^4J = 1.8$  Hz, 2H, NCHN), 7.97-7.68 (m, 4H, Ph<sub>ortho</sub>), 7.44 (dt,  $^{2,3}J = 15.0, 7.6$  Hz, 4H, Ph<sub>para</sub>), 7.30 (d,  $^3J = 7.8$  Hz, 2H, Dipp<sub>p-CH</sub>), 7.25-7.00 (m, 12H, Ph<sub>meta</sub>+Dipp<sub>m-CH</sub>), 6.64 (s, 2H, NCCHN), 6.51 (t,  $^3J = 7.7$  Hz, 4H, Ph<sub>ortho</sub>), 4.75-4.55 (m, 2H, NCH<sub>2</sub>CH<sub>2</sub>P), 4.16 (q,  $^2J = 12.7$  Hz, 2H, NCH<sub>2</sub>CH<sub>2</sub>P), 2.48 (hept,  $^3J = 6.3$  Hz, 2H, Dipp<sub>CH<sub>3</sub>CH<sub>2</sub>CH<sub>3</sub></sub>), 2.29 (hept,  $^3J = 6.8$  Hz, 2H, Dipp<sub>CH<sub>3</sub>CH<sub>2</sub>CH<sub>3</sub></sub>), 1.95 (td,  $^{2,3}J = 14.7, 4.6$  Hz, 2H, NCH<sub>2</sub>CH<sub>2</sub>P), 1.78 (s, 3H, OAc<sub>Me</sub>), 1.70 (t,  $^2J = 13.0$  Hz, 2H, NCH<sub>2</sub>CH<sub>2</sub>P), 1.20 (q,  $^3J = 7.4, 6.9$  Hz, 18H, Dipp<sub>Me</sub>), 0.43 (d,  $^3J = 6.8$  Hz, 6H, Dipp<sub>Me</sub>).

**<sup>13</sup>C NMR** (125 MHz, CD<sub>2</sub>Cl<sub>2</sub>, 300 K): δ 184.2 (s, OAc), 165.1 (t, <sup>2</sup>J<sub>CP</sub> = 12.5 Hz, NCCHN), 146.2 (s, Dipp<sub>quart</sub>), 145.8 (s, Dipp<sub>quart</sub>), 138.9-137.6 (m, Ph<sub>quart</sub>), 134.8 (s, NCN), 134.2 (s, Dipp<sub>quart</sub>), 134.1 (s, Dipp<sub>quart</sub>), 134.0 (t, <sup>3</sup>J<sub>CP</sub> = 4.4 Hz, Ph<sub>ortho</sub>), 132.4 (s, br, Ph<sub>ortho</sub>), 132.3 (s, Dipp<sub>arom</sub>/Ph<sub>arom</sub>), 131.0 (s, Dipp<sub>arom</sub>/Ph<sub>arom</sub>), 130.2 (s, Dipp<sub>arom</sub>/Ph<sub>arom</sub>), 129.8 (s, Dipp<sub>arom</sub>/Ph<sub>arom</sub>), 129.4 (s, Dipp<sub>arom</sub>/Ph<sub>arom</sub>), 129.2 (s, Dipp<sub>arom</sub>/Ph<sub>arom</sub>), 129.0 (s, Dipp<sub>arom</sub>/Ph<sub>arom</sub>), 128.9 (d, <sup>3</sup>J<sub>CP</sub> = 6.9 Hz, Dipp<sub>arom</sub>/Ph<sub>arom</sub>), 128.3 (q, <sup>3</sup>J<sub>CP</sub> = 4.5 Hz, Dipp<sub>arom</sub>/Ph<sub>arom</sub>), 124.6 (s, Dipp<sub>arom</sub>/Ph<sub>arom</sub>), 124.3 (s, Dipp<sub>arom</sub>/Ph<sub>arom</sub>), 45.8 (s, NCH<sub>2</sub>CH<sub>2</sub>P), 28.9 (s, Dipp<sub>CH<sub>3</sub>CHCH<sub>3</sub></sub>), 26.4-26.1 (m, NCH<sub>2</sub>CH<sub>2</sub>P), 25.2 (s, OAc<sub>Me</sub>), 24.4 (d, <sup>3</sup>J = 7.5 Hz, Dipp<sub>Me</sub>), 24.2 (s, Dipp<sub>Me</sub>), 23.2 (s, Dipp<sub>Me</sub>), 21.8 (s, Dipp<sub>Me</sub>), 14.4 (s, Dipp<sub>Me</sub>).

**<sup>31</sup>P NMR** (162 MHz, CD<sub>2</sub>Cl<sub>2</sub>, 300 K): δ 56.1 (s).

## Synthesis of 3a

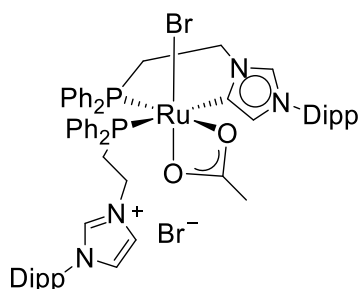

**3a**

C<sub>60</sub>H<sub>70</sub>Br<sub>2</sub>N<sub>4</sub>O<sub>2</sub>P<sub>2</sub>Ru  
1040.26 g/mol

Ru(OAc)<sub>2</sub>(PPh<sub>3</sub>)<sub>2</sub> (696 mg, 935 μmol, 1.00 eq) and L<sup>Dipp</sup> (1.00 g, 1.92 mmol, 2.05 eq) are dissolved in THF (100 mL) and stirred for 6 h at r.t. The solution is filtered off *via* a whatman-filtration and the residual pink precipitate washed with THF (10 mL). Product **3a** is obtained as a pink powder (876 mg, 729 μmol, 78%).

**Elemental analysis** calcd (%) for C<sub>60</sub>H<sub>70</sub>Br<sub>2</sub>N<sub>4</sub>O<sub>2</sub>P<sub>2</sub>Ru: C, 59.95; H, 5.87; N, 4.66. Found: C, 58.27; H, 5.81; N 4.54.

**<sup>1</sup>H NMR** (400 MHz, CD<sub>2</sub>Cl<sub>2</sub>, 300 K): δ 9.72 (t, <sup>4</sup>J = 1.6 Hz, 1H), 8.37 (t, <sup>4</sup>J = 1.7 Hz, 1H), 8.01 (t, <sup>4</sup>J = 1.4 Hz, 1H), 7.77-7.66 (m, 2H), 7.55 (t, <sup>3</sup>J = 7.8 Hz, 1H), 7.53-7.39 (m, 4H), 7.37-7.23 (m, 11/12H), 7.21-7.06 (m, 4/5H), 7.00 (t, <sup>3</sup>J = 8.4 Hz, 2H), 6.89 (t, <sup>3</sup>J = 8.5 Hz, 2H), 4.80-4.53 (m, 1H, CH<sub>2</sub>), 4.19 (q, <sup>2</sup>J = 13.1 Hz, 1H, CH<sub>2</sub>), 3.98-3.79 (m, 1H, CH<sub>2</sub>), 3.65-3.54 (m, 1H, CH<sub>2</sub>), 3.24-3.07 (m, 2H, CH<sub>2</sub>), 3.05-2.88 (m, 1H, CH<sub>2</sub>), 2.67-2.49 (m, 2H, Dipp<sub>CH<sub>3</sub>CH<sub>3</sub></sub>), 2.42 (td, <sup>2,3</sup>J = 13.2, 5.7 Hz, 1H, CH<sub>2</sub>), 2.33-2.16 (m, 2H, Dipp<sub>CH<sub>3</sub>CH<sub>3</sub></sub>), 1.29-1.12 (m, 24H, Dipp<sub>Me</sub>), 1.08 (s, 3H, OAc<sub>Me</sub>).

**<sup>13</sup>C NMR** (125 MHz, CD<sub>2</sub>Cl<sub>2</sub>, 300 K): δ 184.5 (s, OAc), 164.4 (dd, J<sub>PC</sub> = 101.3, 15.8 Hz, NCCHN<sub>bound</sub>), 146.0 (s, NCCHN<sub>dangl</sub>), 145.5 (d, J<sub>PC</sub> = 4.1 Hz), 145.4 (s), 140.9 (s), 140.6 (s), 137.9 (s), 137.6 (s), 136.9 (s), 135.8 (s), 135.6 (s), 134.4 (d, J<sub>PC</sub> = 11.9 Hz), 134.2 (d, J<sub>PC</sub> = 10.0 Hz), 134.0 (s), 133.7 (s), 133.6 (s), 132.8 (d, J<sub>PC</sub> = 9.3 Hz), 132.5 (d, J<sub>PC</sub> = 4.2 Hz), 132.4 (d, J<sub>PC</sub> = 7.8 Hz), 132.0 (s), 131.7 (s), 130.4 (s), 130.3 (s), 129.6 (s), 128.9 (d, J<sub>PC</sub> = 4.9 Hz), 128.8 (d, J<sub>PC</sub> = 2.0 Hz), 128.7 (s), 128.5 (d, J<sub>PC</sub> = 7.0 Hz), 128.2 (s), 128.1 (d, J<sub>PC</sub> = 8.6 Hz), 127.8-127.4 (m), 124.6 (d, J<sub>PC</sub> = 1.4 Hz), 123.9 (d, J<sub>PC</sub> = 9.9 Hz), 123.8 (s), 123.6 (s), 46.3 (s, NCH<sub>2</sub>CH<sub>2</sub>P<sub>bound</sub>), 44.4 (d, J<sub>PC</sub> = 8.6 Hz, NCH<sub>2</sub>CH<sub>2</sub>P<sub>dangl</sub>), 31.6 (d, J<sub>PC</sub> = 30.6 Hz, NCH<sub>2</sub>CH<sub>2</sub>P<sub>bound</sub>), 29.2 (d, J<sub>PC</sub> = 16.8 Hz, NCH<sub>2</sub>CH<sub>2</sub>P<sub>dangl</sub>), 28.6 (d, J<sub>PC</sub> = 6.1 Hz), 28.3 (d, J<sub>PC</sub> = 6.2 Hz), 24.6-23.6 (m, Dipp<sub>Me</sub>).

**<sup>31</sup>P NMR** (162 MHz, CD<sub>2</sub>Cl<sub>2</sub>, 300 K): δ 56.9 (d, J<sub>PP</sub> = 24.7 Hz, P<sub>transC</sub>), 25.1 (d, J<sub>PP</sub> = 24.6 Hz, P<sub>transO</sub>).



## NMR evidence of **3b**

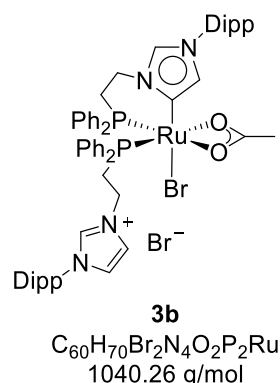

Compound **3b** was prepared and analyzed as an intermediate species. Compound **3a** (30.0 mg, 25.0  $\mu$ mol, 1 eq) is dissolved in CD<sub>2</sub>Cl<sub>2</sub> (4 mL) in an NMR tube at r.t. <sup>1</sup>H, <sup>13</sup>C, <sup>31</sup>P and 2D NMR measurements are performed at 1 h, 5 h, 17 h and 24 h for the NMR study (Manuscript, Figure 2). Characterization of **3b** was evaluated for measurements at 24 h excluding complex **3** as side-product.

**<sup>1</sup>H NMR** (400 MHz, CD<sub>2</sub>Cl<sub>2</sub>, 300 K):  $\delta$  9.86 (t, <sup>4</sup>J = 1.5 Hz, 1H, NCHN<sub>dangl</sub>), 8.24 (t, <sup>4</sup>J = 1.7 Hz, 1H, NCHCHN<sub>dangl</sub>), 8.15 (d, <sup>4</sup>J = 1.8 Hz, 1H, NCHN<sub>bound</sub>), 8.05 (ddd, <sup>2,3</sup>J = 9.9, 6.8, 3.1 Hz, 2H, Ph<sub>ortho</sub>), 7.91-7.80 (m, 2H, Ph<sub>ortho</sub>), 7.62 (t, <sup>3</sup>J = 8.5 Hz, 2H, Ph<sub>para</sub>), 7.56 (t, <sup>3</sup>J = 7.8 Hz, 1H, NCHCHN<sub>dangl</sub>), 7.45 (t, <sup>3</sup>J = 7.8 Hz, 2H, Ph<sub>para</sub>), 7.39 (td, <sup>3,4</sup>J = 7.3, 1.3 Hz, 2H, Ph<sub>meta</sub>/Dipp<sub>arom</sub>), 7.38-7.07 (m, 20H, Ph<sub>meta</sub>/Dipp<sub>arom</sub>), 6.50 (d, <sup>4</sup>J = 1.8 Hz, 1H, NCCHN), 6.43 (t, <sup>3</sup>J = 8.4 Hz, 2H, Ph<sub>ortho</sub>), 4.51-4.31 (m, 1H, CH<sub>2</sub>), 3.98 (q, <sup>2</sup>J = 13.3 Hz, 1H, CH<sub>2</sub>), 3.50 (td, <sup>2,3</sup>J = 12.0, 6.5 Hz, 1H, CH<sub>2</sub>), 2.75 (qd, <sup>2,3</sup>J = 12.2, 6.6 Hz, 1H, CH<sub>2</sub>), 2.66-2.52 (m, 1H, CH<sub>2</sub>), 2.43-2.28 (m, 3H, CH<sub>2</sub>, Dipp<sub>CH<sub>3</sub>CHCH<sub>3</sub></sub>), 2.31-2.15 (m, 2H, Dipp<sub>CH<sub>3</sub>CHCH<sub>3</sub></sub>), 1.88 (s, 3H, OAc<sub>Me</sub>), 1.29-1.12 (m, 23H, Dipp<sub>Me</sub>), 1.11 (d, <sup>3</sup>J = 6.8 Hz, 3H, Dipp<sub>Me</sub>), 0.54 (d, <sup>3</sup>J = 6.8 Hz, 3H, Dipp<sub>Me</sub>).

**<sup>13</sup>C NMR** (125 MHz, CD<sub>2</sub>Cl<sub>2</sub>, 300 K):  $\delta$  186.3 (s, OAc), 158.1 (t, J<sub>PC</sub> = 14.6 Hz, NCCHN<sub>bound</sub>), 146.4 (s), 145.9 (d, J<sub>PC</sub> = 14.7 Hz), 145.5 (s), 139.1-137.9 (m), 137.4 (s), 136.5 (dd, J<sub>PC</sub> = 38.2, 21.9 Hz), 134.6 (d, J<sub>PC</sub> = 9.6 Hz), 134.4 (d, J<sub>PC</sub> = 9.8 Hz), 133.9 (s), 132.9 (d, J<sub>PC</sub> = 8.4 Hz), 132.5 (d, J<sub>PC</sub> = 8.0 Hz), 132.3 (s), 131.9 (s), 131.2 (s), 130.7 (s), 130.3-129.8 (m), 128.6 (d, J<sub>PC</sub> = 9.0 Hz), 128.5 (s), 128.4 (s), 128.3 (s), 128.2 (s), 128.1 (d, J<sub>PC</sub> = 2.9 Hz), 128.1 (s), 125.2 (d, J<sub>PC</sub> = 3.3 Hz), 124.7 (s), 124.6 (s), 124.5 (s), 124.4 (s), 47.8 (d, J<sub>PC</sub> = 7.4 Hz, NCH<sub>2</sub>CH<sub>2</sub>P<sub>dangl</sub>), 45.9 (s, NCH<sub>2</sub>CH<sub>2</sub>P<sub>bound</sub>), 32.9 (d, J<sub>PC</sub> = 21.5 Hz, NCH<sub>2</sub>CH<sub>2</sub>P<sub>bound</sub>), 29.2 (d, J<sub>PC</sub> = 4.1 Hz), 28.9 (d, J<sub>PC</sub> = 13.4 Hz, NCH<sub>2</sub>CH<sub>2</sub>P<sub>dangl</sub>), 26.1 (s), 25.1 (s), 24.8 (s), 24.8 (s), 24.7 (s), 24.6 (d, J<sub>PC</sub> = 2.6 Hz), 24.5 (s), 24.3 (s), 23.5 (s), 23.2 (s).

**<sup>31</sup>P NMR** (162 MHz, CD<sub>2</sub>Cl<sub>2</sub>, 300 K):  $\delta$  50.1 (d, J<sub>PP</sub> = 43.3 Hz), 49.6 (d, J<sub>PP</sub> = 43.3 Hz).

## NMR Spectra

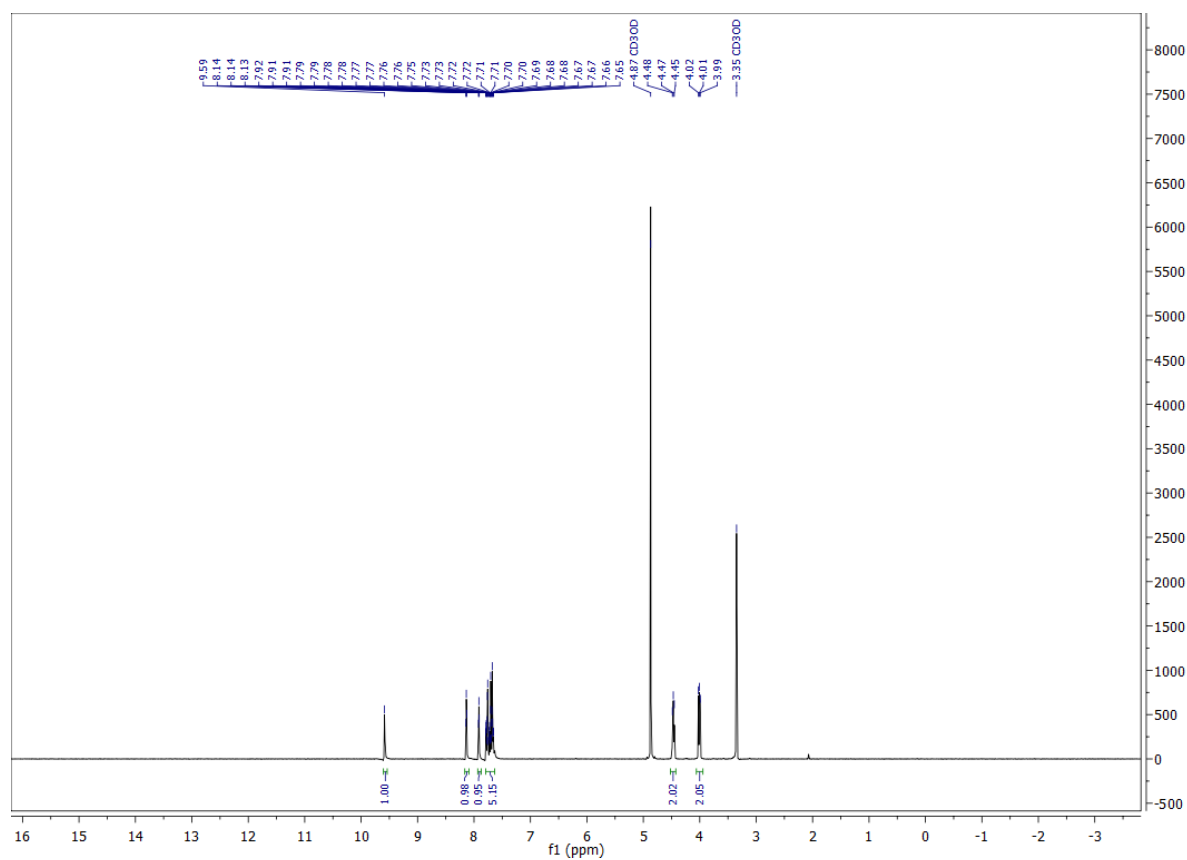

Figure S1:  $^1\text{H}$  NMR (400 MHz,  $\text{CD}_3\text{OD}$ , 300 K) spectrum of L1.

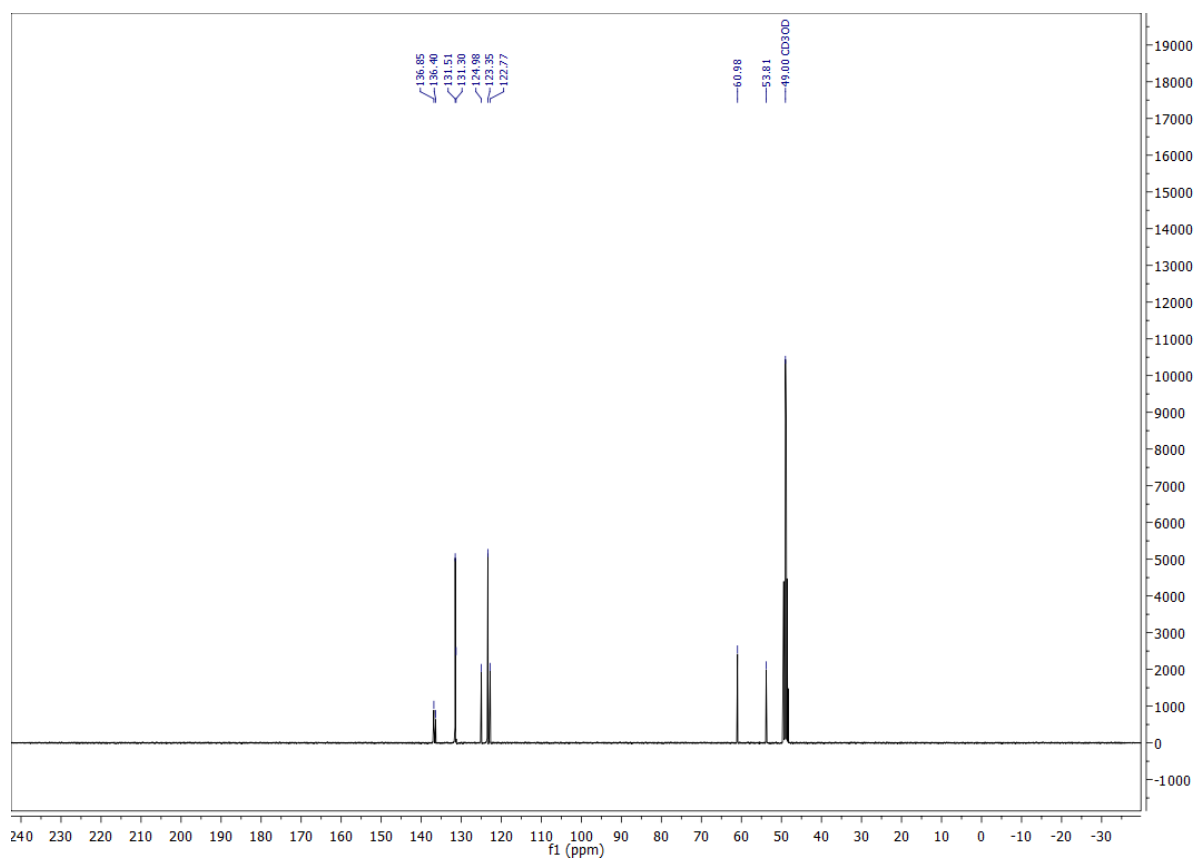

Figure S2:  $^{13}\text{C}$  NMR (101 MHz,  $\text{CD}_3\text{OD}$ , 300 K) spectrum of L1.

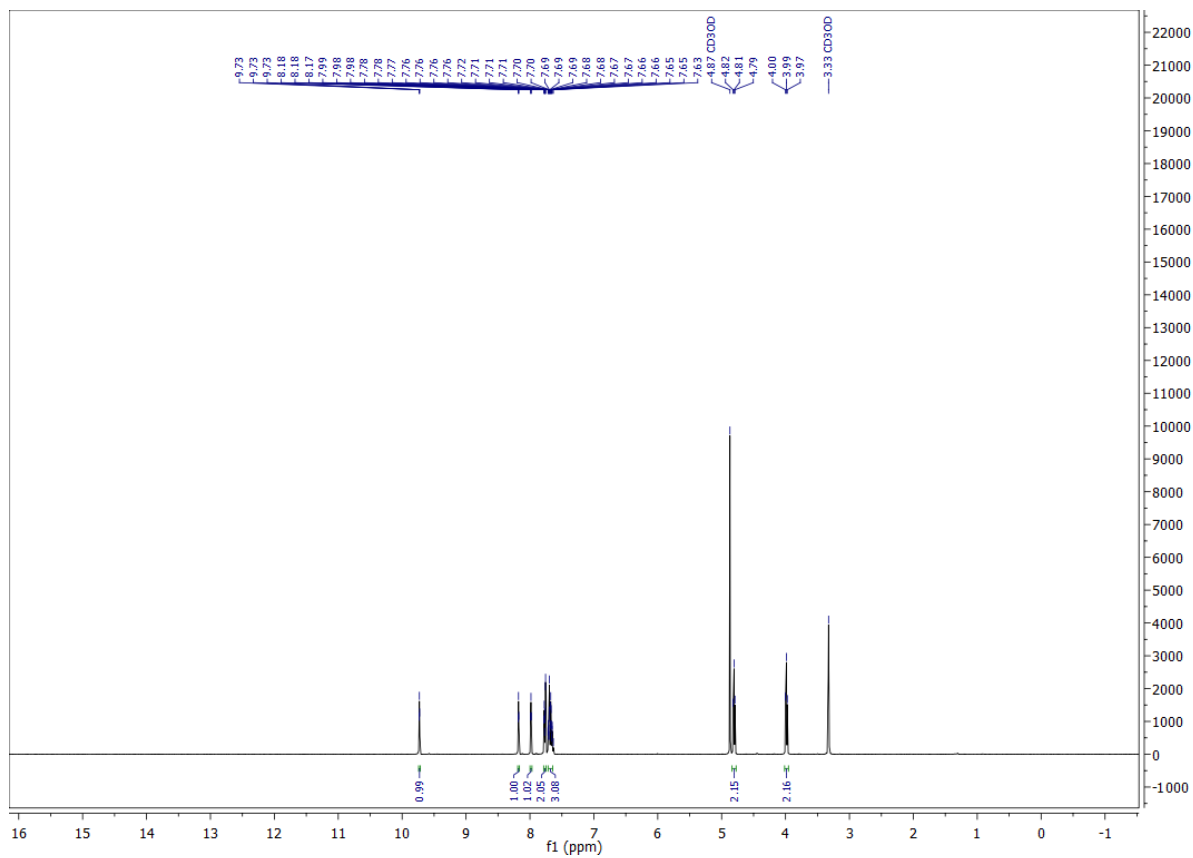

Figure S3:  $^1\text{H}$  NMR (400 MHz,  $\text{CD}_3\text{OD}$ , 300 K) spectrum of L2.

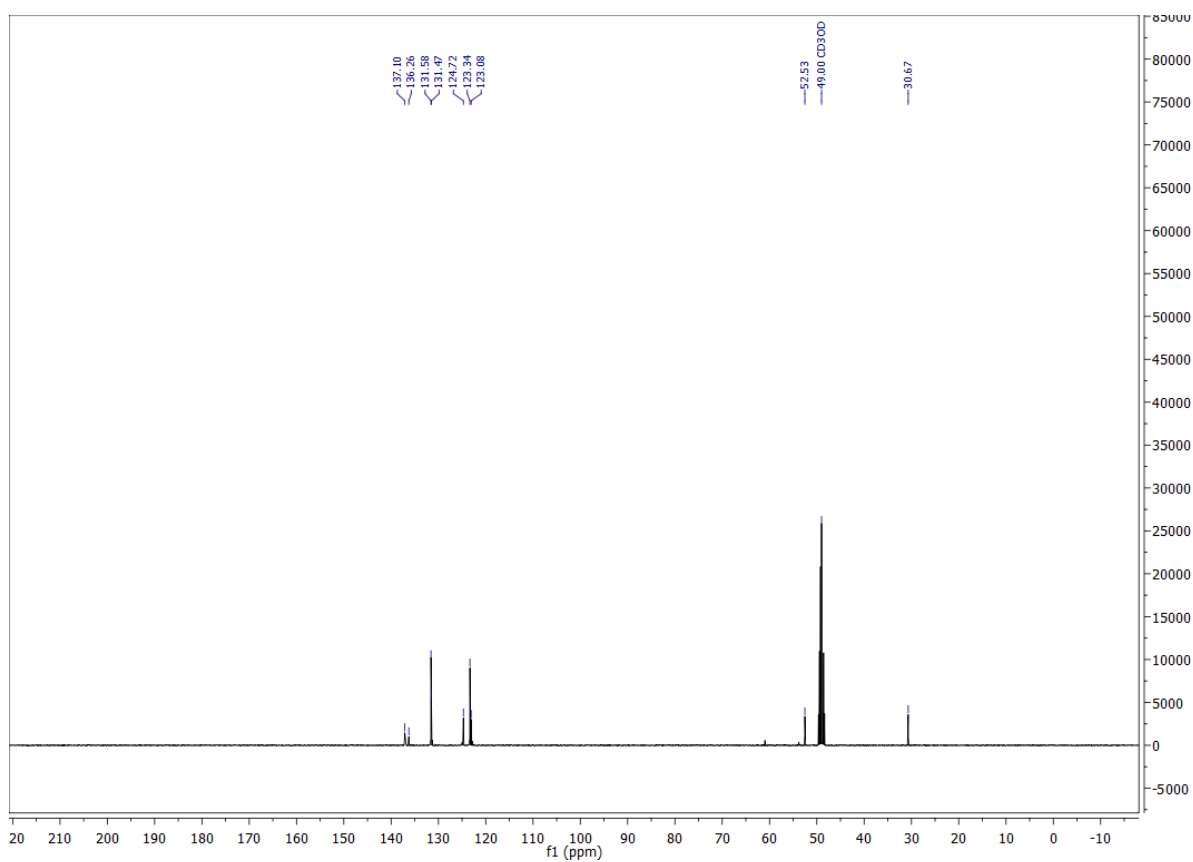

Figure S4:  $^{13}\text{C}$  NMR (101 MHz,  $\text{CD}_3\text{OD}$ , 300 K) spectrum of L2.

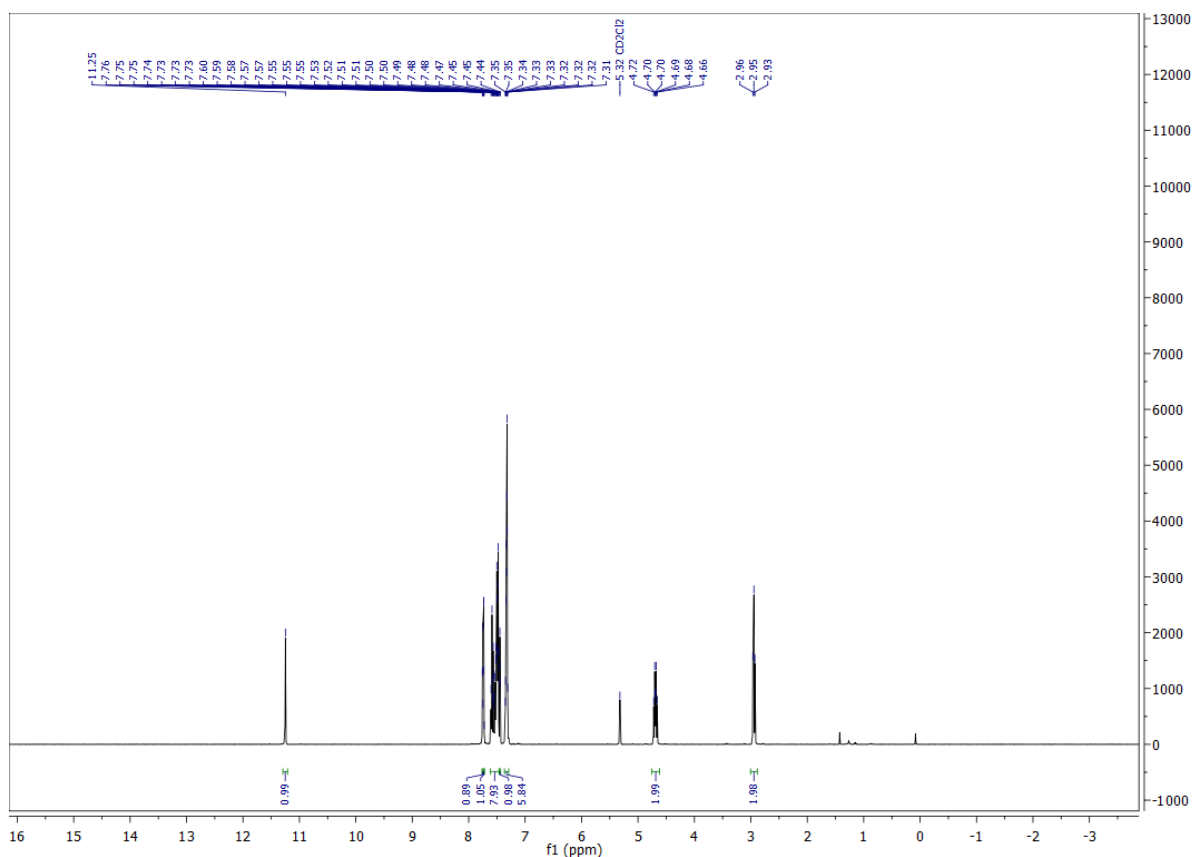

Figure S5:  $^1\text{H}$  NMR (400 MHz,  $\text{CD}_2\text{Cl}_2$ , 300 K) spectrum of  $\text{L}^{\text{Ph}}$ .

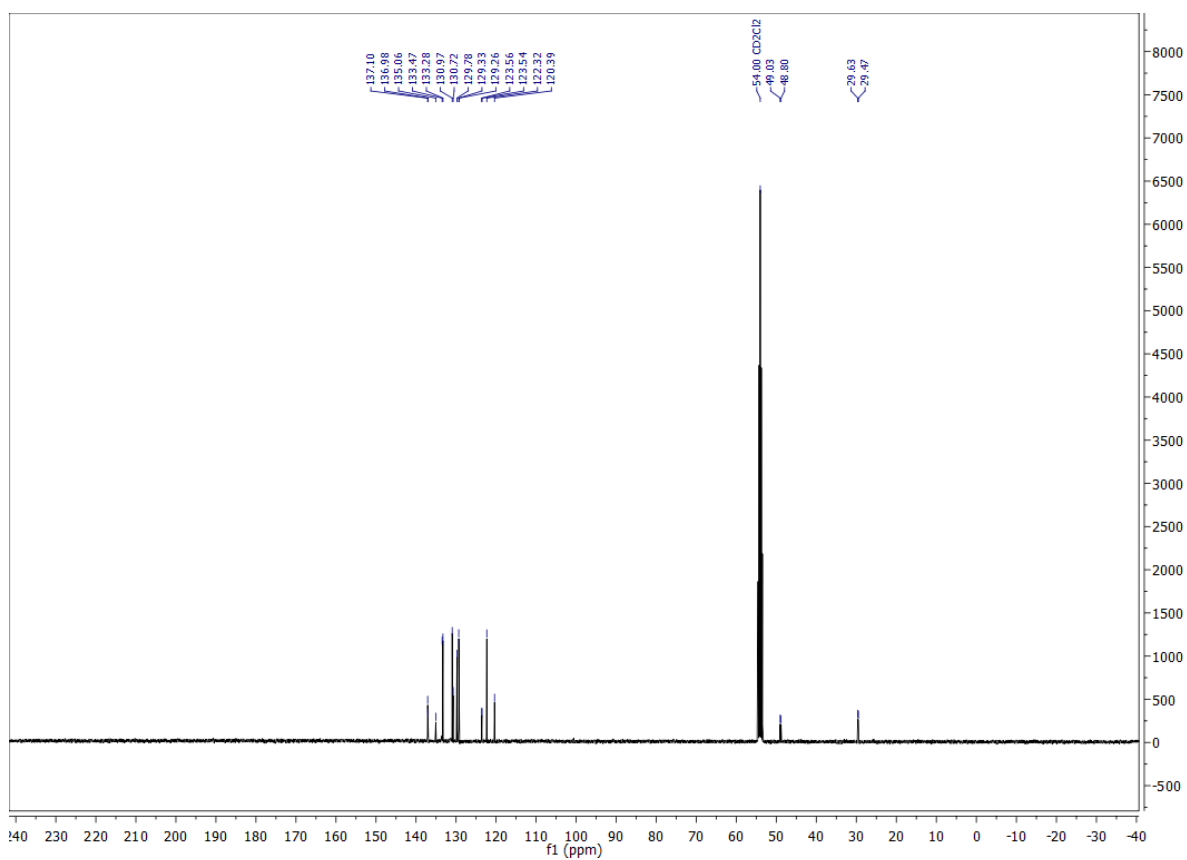

Figure S6:  $^{13}\text{C}$  NMR (101 MHz,  $\text{CD}_2\text{Cl}_2$ , 300 K) spectrum of  $\text{L}^{\text{Ph}}$ .

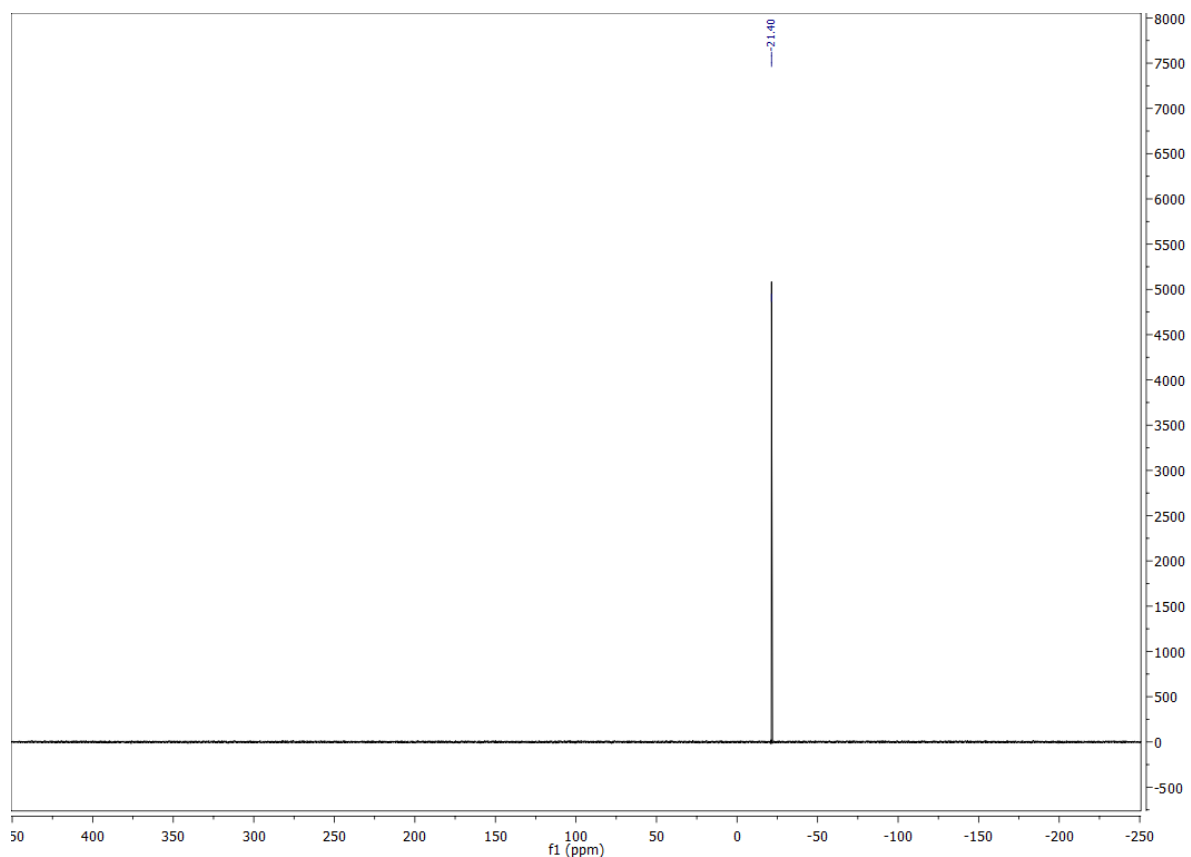

Figure S7:  $^{31}\text{P}$  NMR (162 MHz,  $\text{CD}_2\text{Cl}_2$ , 300 K) spectrum of **LPh**.

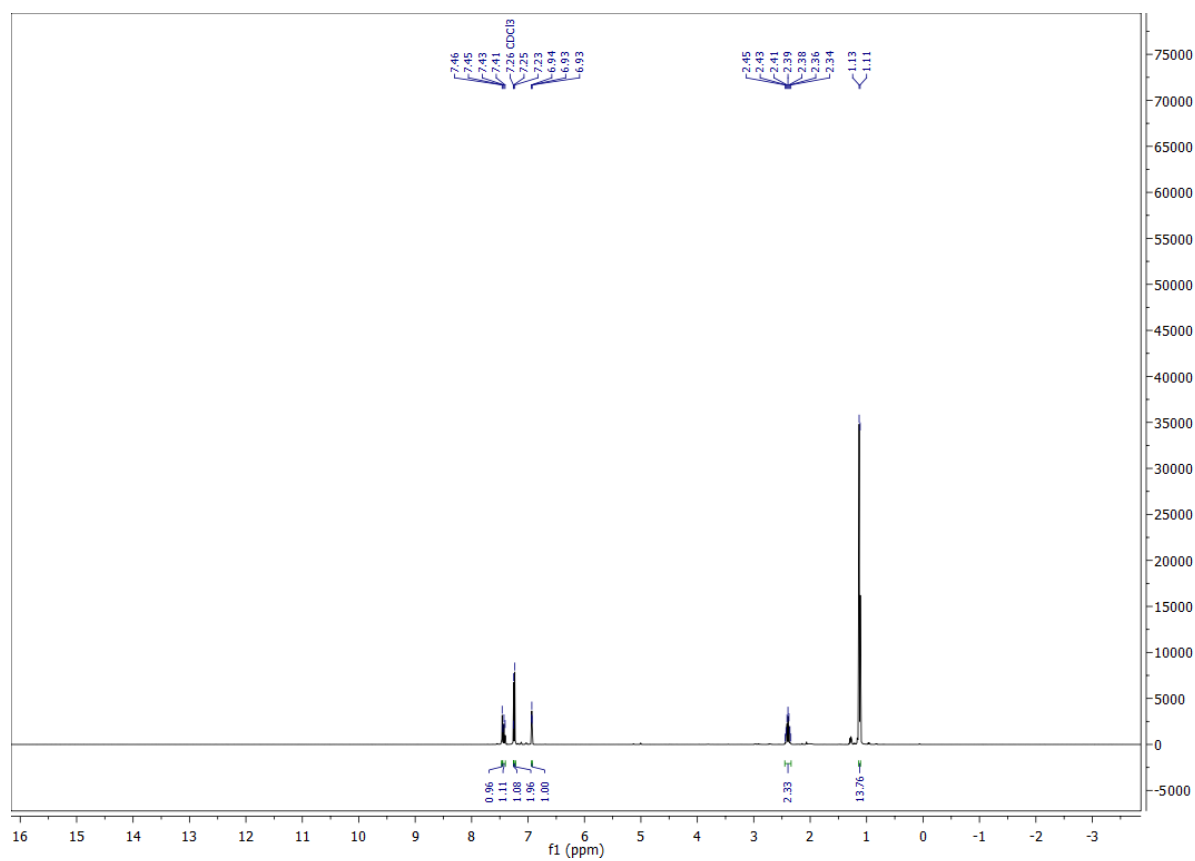

Figure S8:  $^1\text{H}$  NMR (400 MHz,  $\text{CDCl}_3$ , 300 K) spectrum of **L3**.

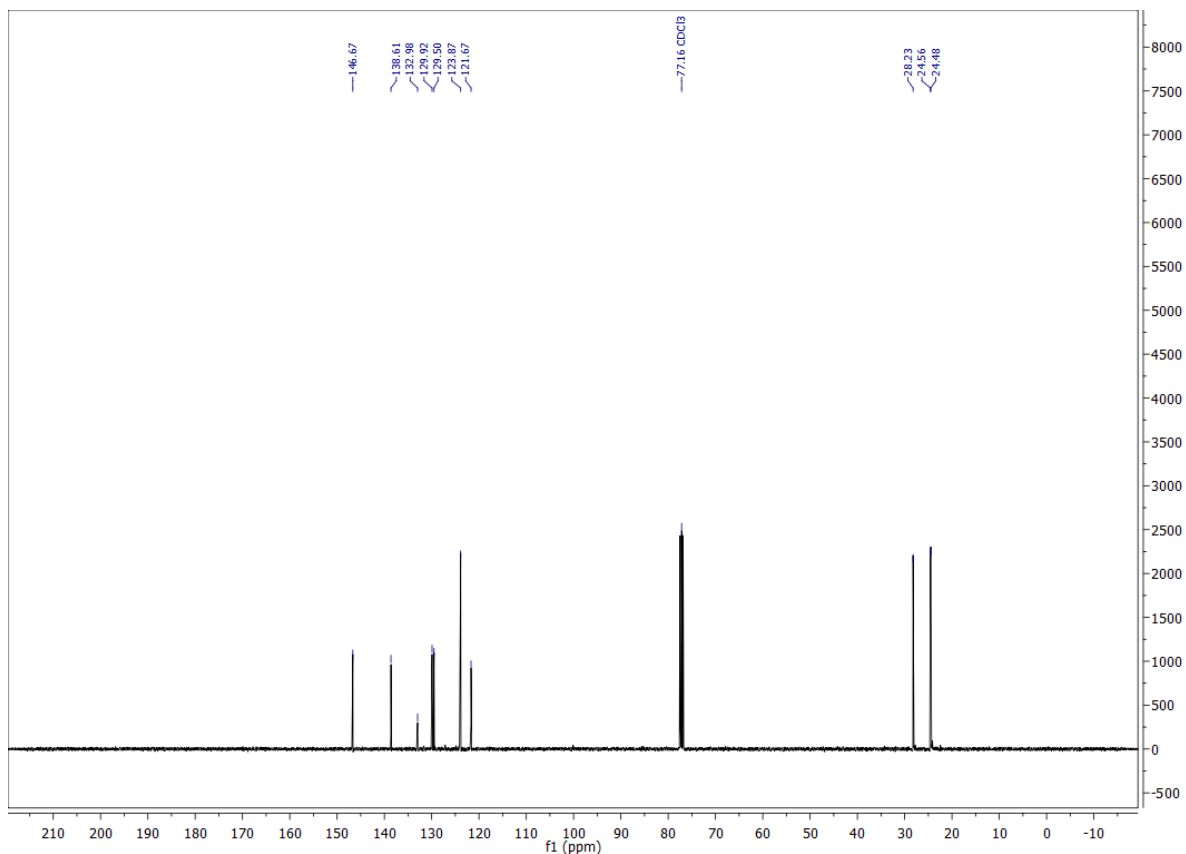

Figure S9:  $^{13}\text{C}$  NMR (101 MHz,  $\text{CDCl}_3$ , 300 K) spectrum of L3.

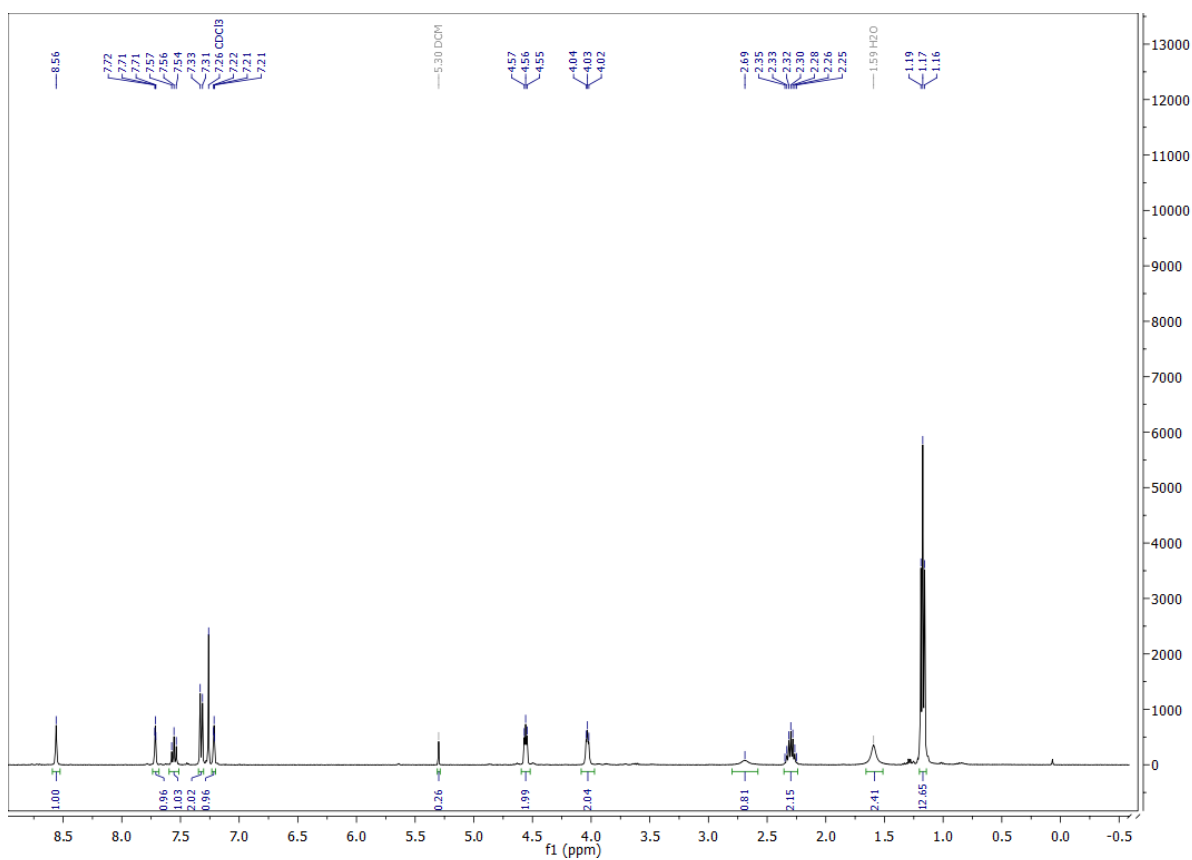

Figure S10:  $^1\text{H}$  NMR (400 MHz,  $\text{CD}_2\text{Cl}_2$ , 300 K) spectrum of L4.

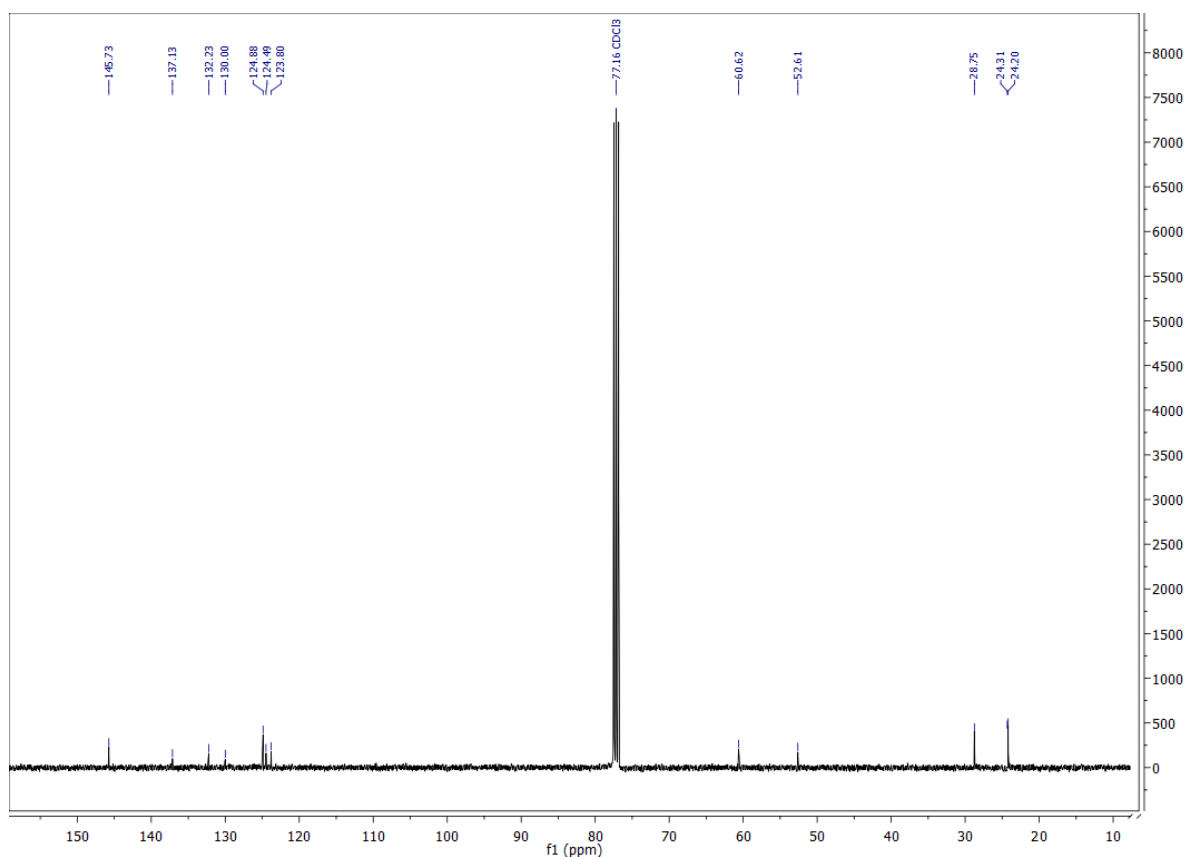

Figure S11:  $^{13}\text{C}$  NMR (101 MHz,  $\text{CDCl}_3$ , 300 K) spectrum of L4.

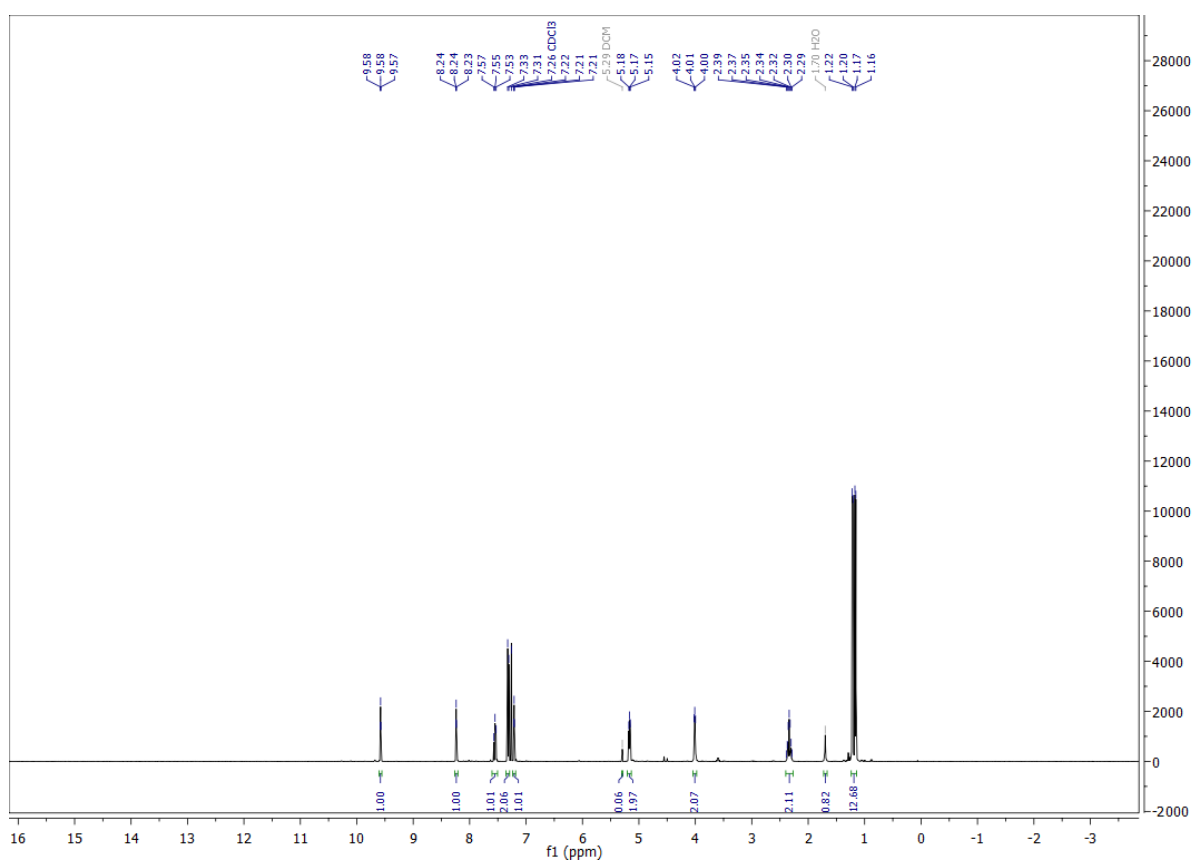

Figure S12:  $^1\text{H}$  NMR (400 MHz,  $\text{CDCl}_3$ , 300 K) spectrum of L5.

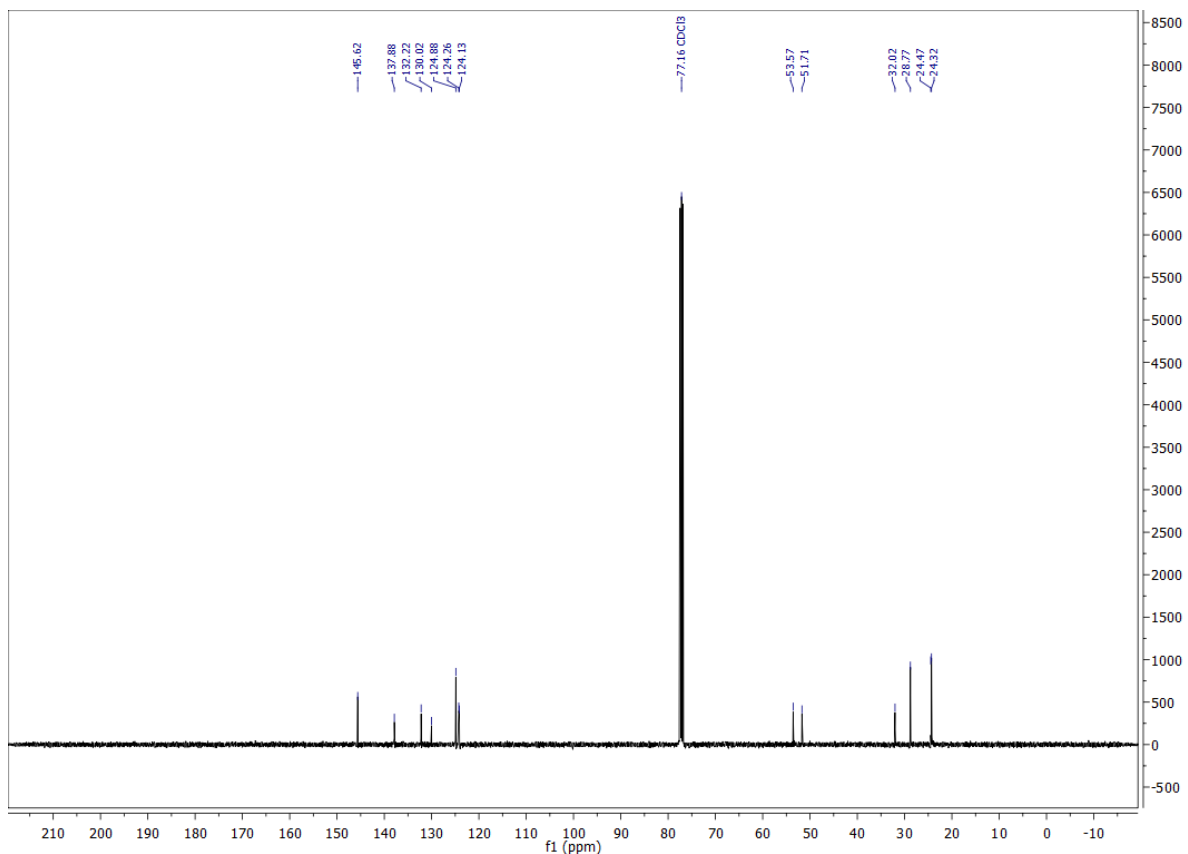

Figure S13:  $^{13}\text{C}$  NMR (101 MHz,  $\text{CDCl}_3$ , 300 K) spectrum of **L5**.

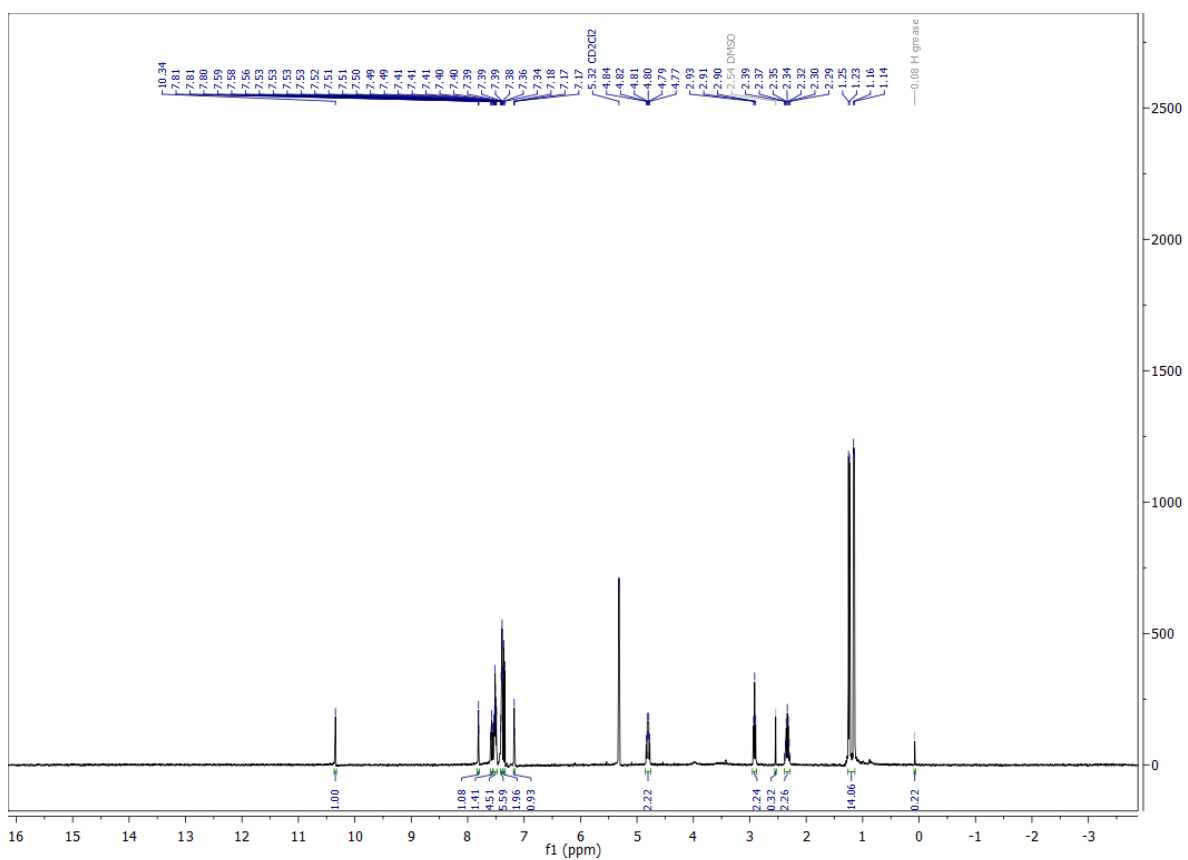

Figure S14:  $^1\text{H}$  NMR (400 MHz,  $\text{CD}_2\text{Cl}_2$ , 300 K) spectrum of **L5**.



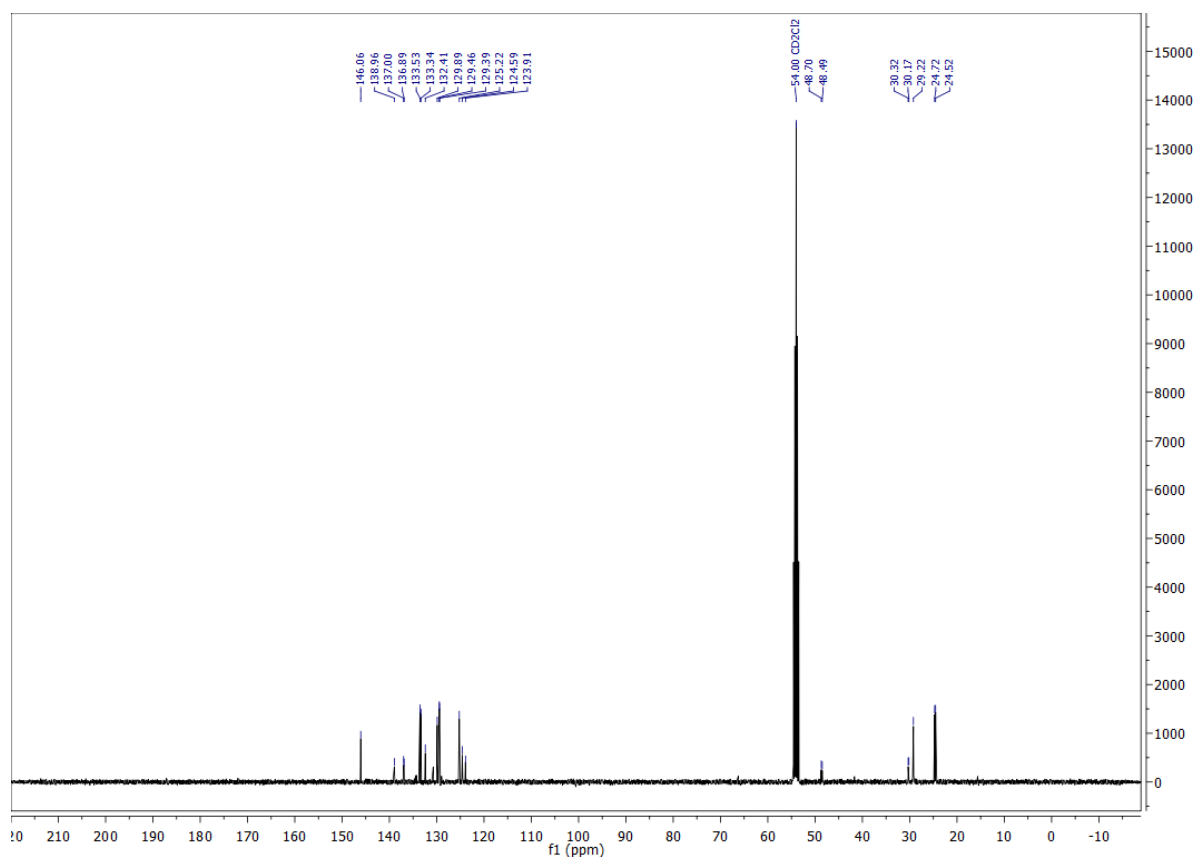

Figure S15:  $^{13}\text{C}$  NMR (101 MHz,  $\text{CD}_2\text{Cl}_2$ , 300 K) spectrum of  $\text{L}^{\text{Dipp}}$ .

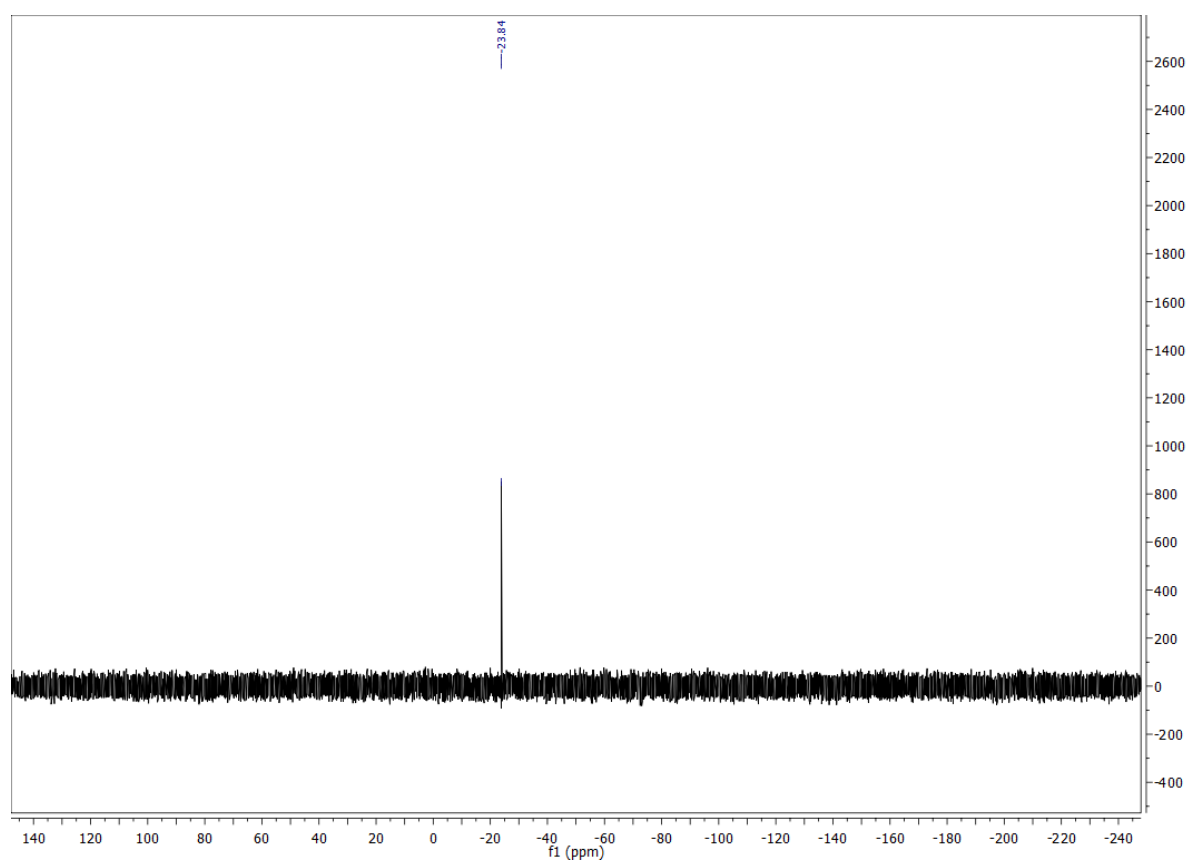

Figure S16:  $^{31}\text{P}$  NMR (162 MHz,  $\text{CD}_2\text{Cl}_2$ , 300 K) spectrum of  $\text{L}^{\text{Dipp}}$ .

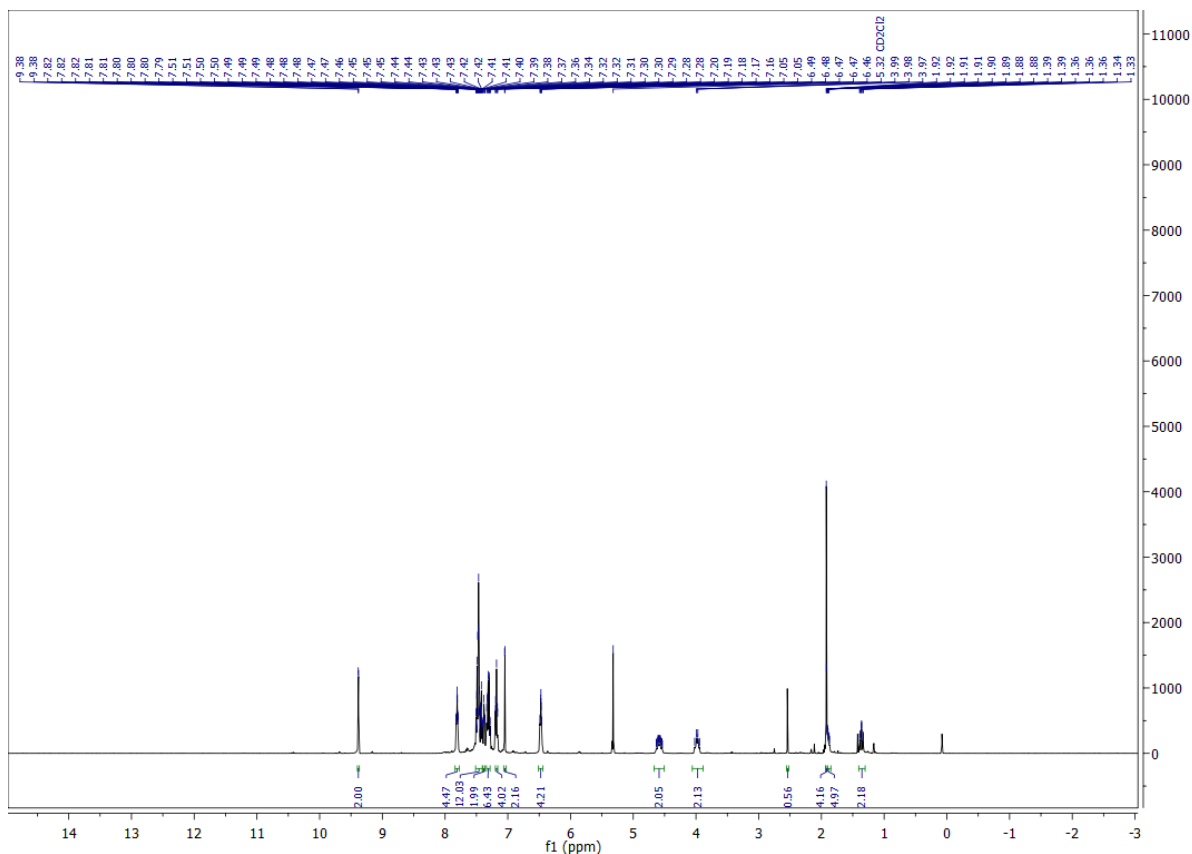

Figure S17:  $^1\text{H}$  NMR (400 MHz,  $\text{CD}_2\text{Cl}_2$ , 300 K) spectrum of **1**.

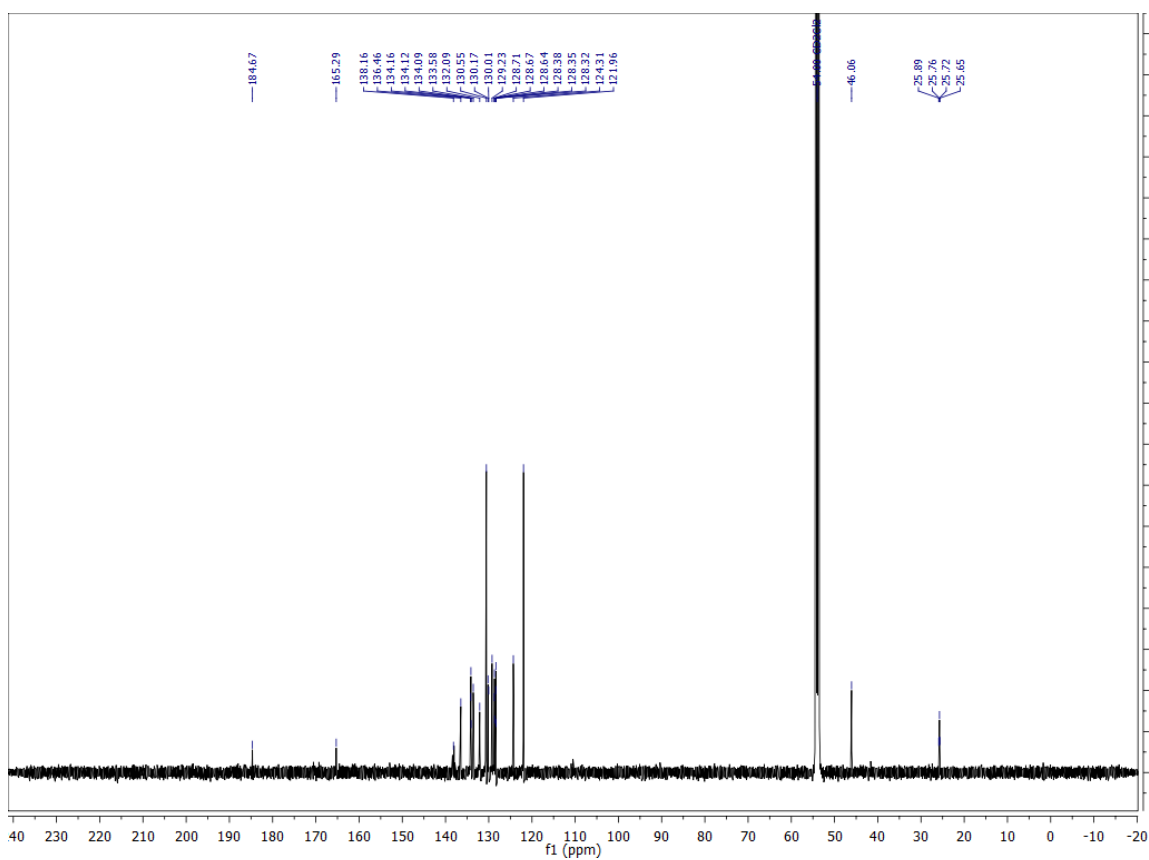

Figure S18:  $^{13}\text{C}$  NMR (125 MHz,  $\text{CD}_2\text{Cl}_2$ , 300 K) spectrum of **1**.

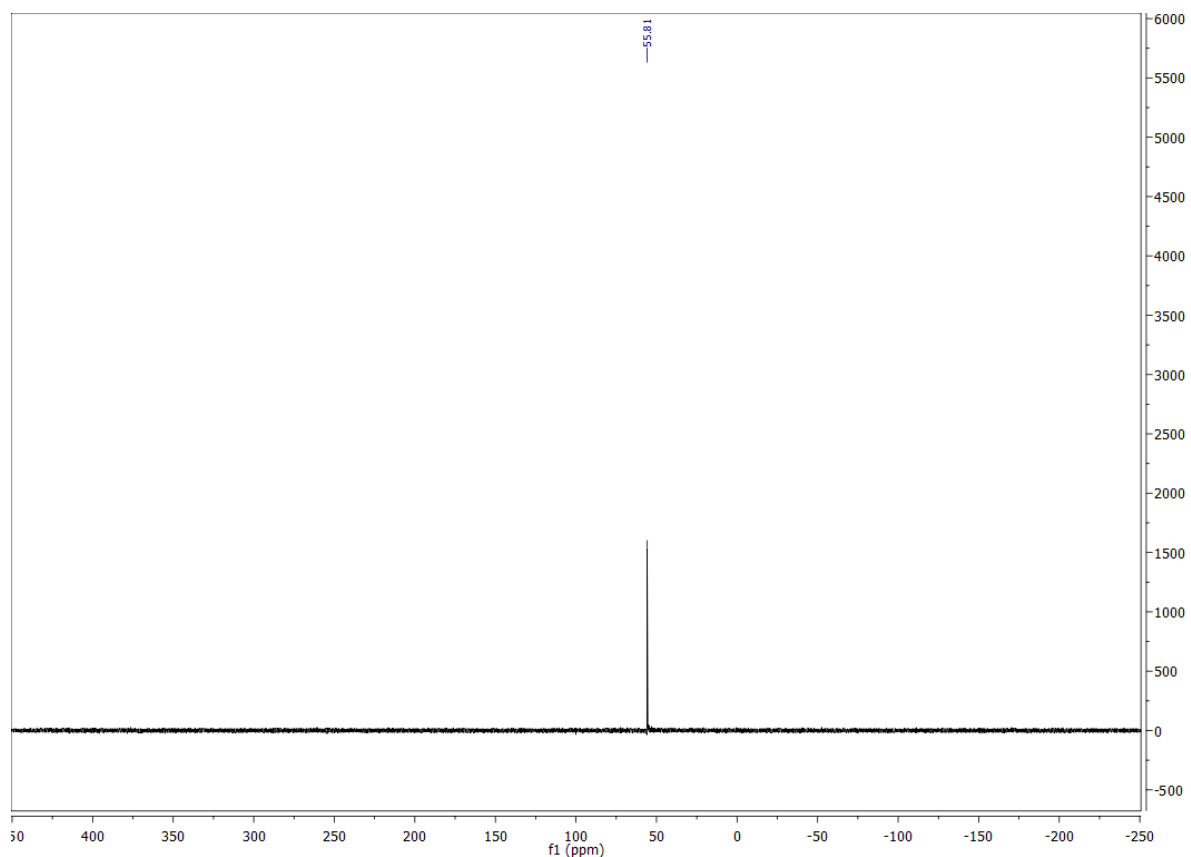

Figure S19:  $^{31}\text{P}$  NMR (162 MHz,  $\text{CD}_2\text{Cl}_2$ , 300 K) spectrum of **1**.

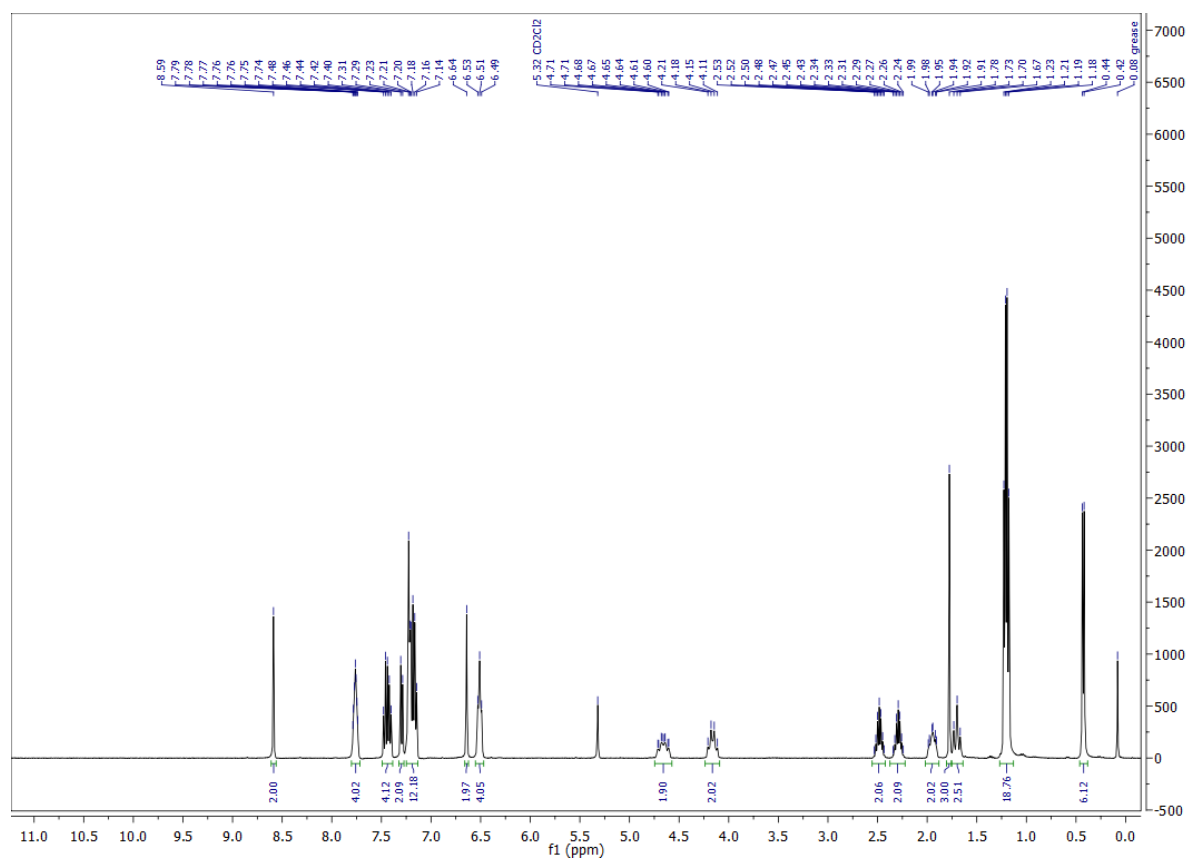

Figure S20:  $^1\text{H}$  NMR (400 MHz,  $\text{CD}_2\text{Cl}_2$ , 300 K) spectrum of **3**.

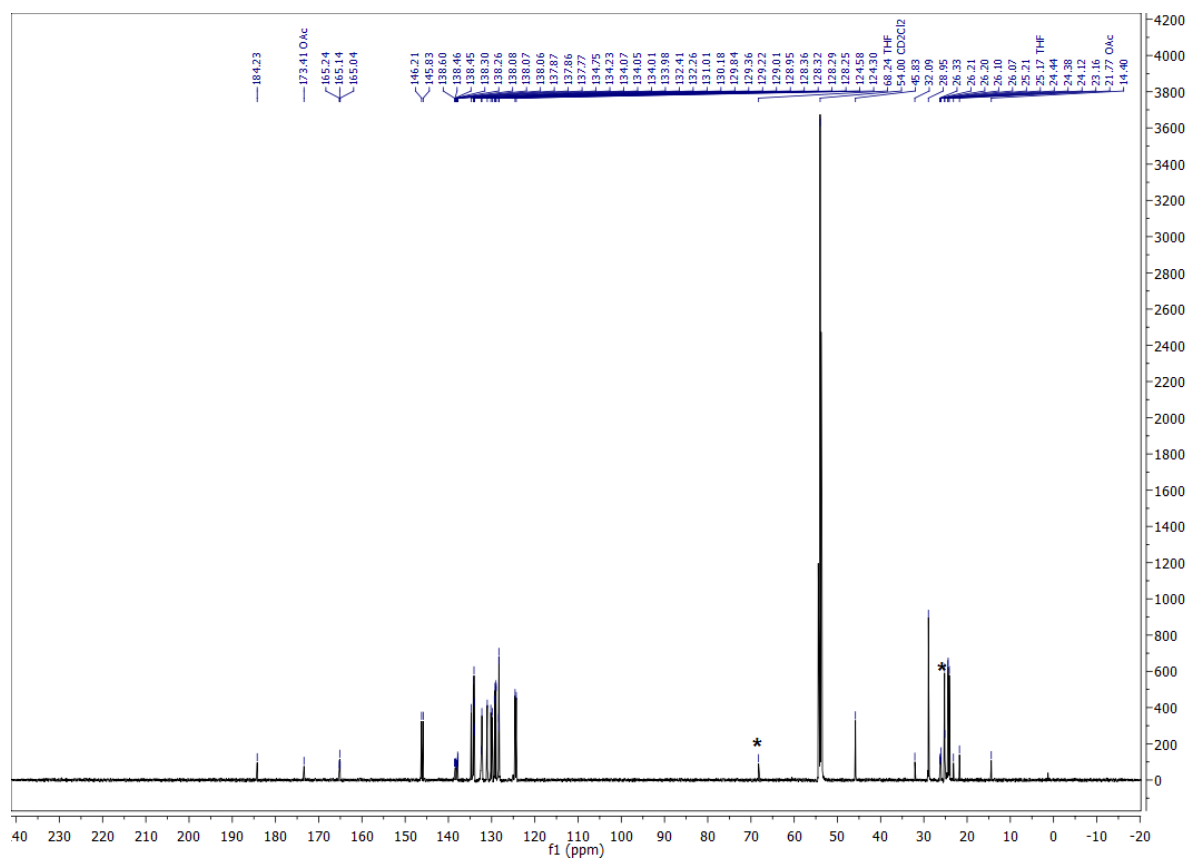

Figure S21:  $^{13}\text{C}$  NMR (125 MHz,  $\text{CD}_2\text{Cl}_2$ , 300 K) spectrum of **3**. Residual THF marked with asterisks (\*).

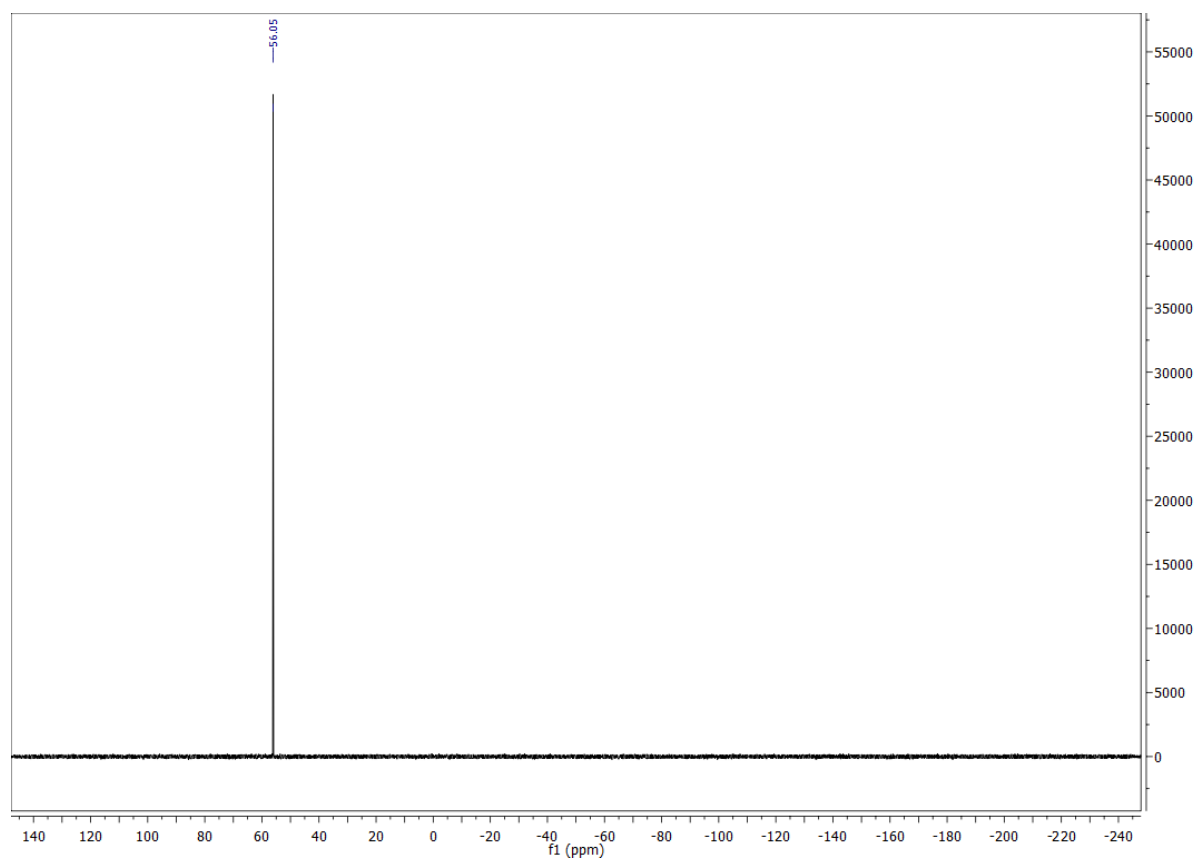

Figure S22:  $^{31}\text{P}$  NMR (162 MHz,  $\text{CD}_2\text{Cl}_2$ , 300 K) spectrum of **3**.



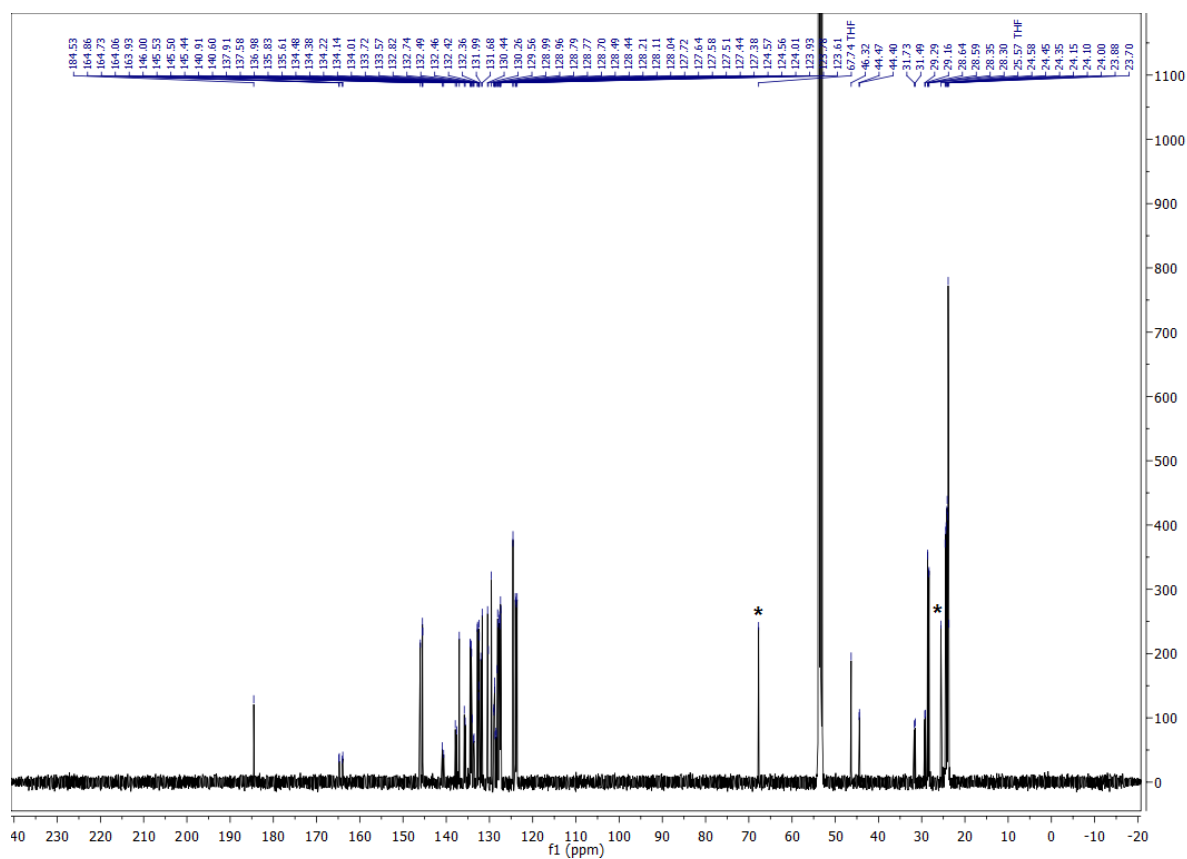

Figure S25:  $^{13}\text{C}$  NMR (125 MHz,  $\text{CD}_2\text{Cl}_2$ , 300 K) spectrum of **3a**. Residual THF marked with asterisks (\*).

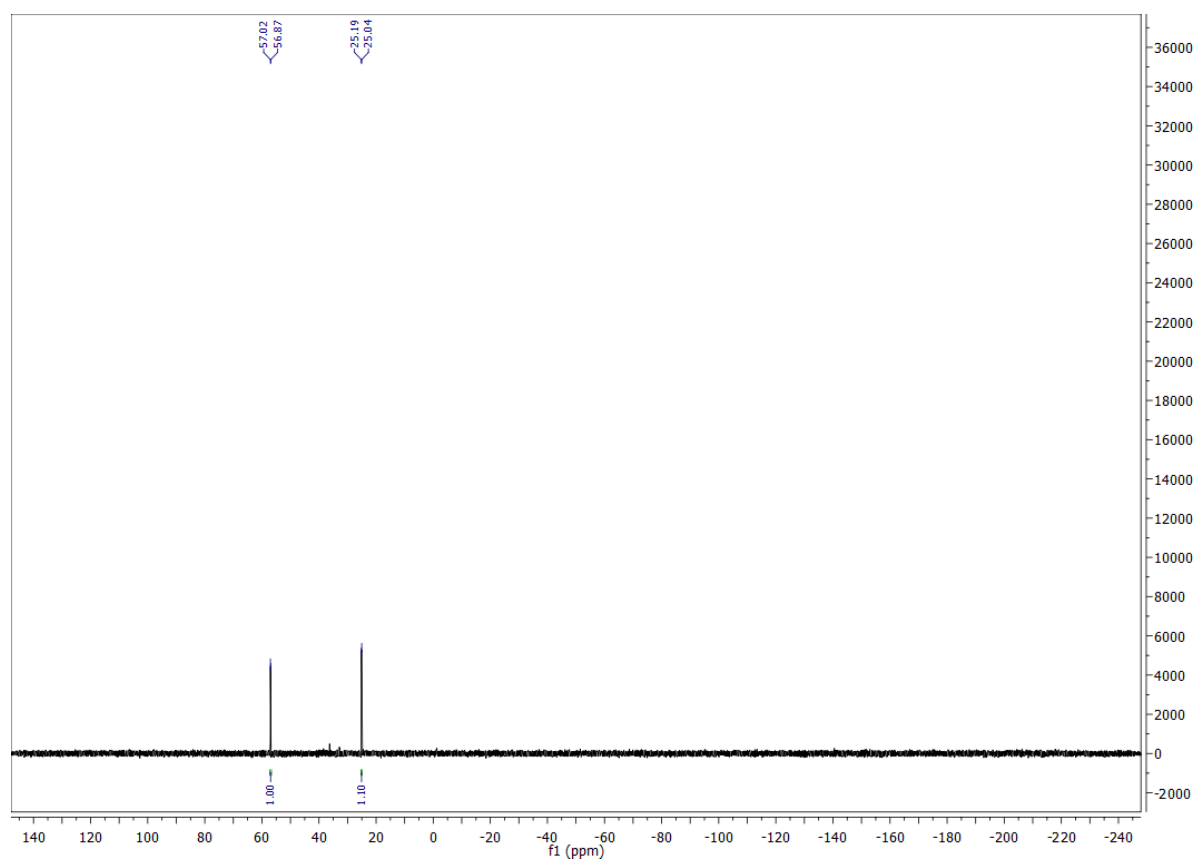

Figure S26:  $^{31}\text{P}$  NMR (162 MHz,  $\text{CD}_2\text{Cl}_2$ , 300 K) spectrum of **3a**.

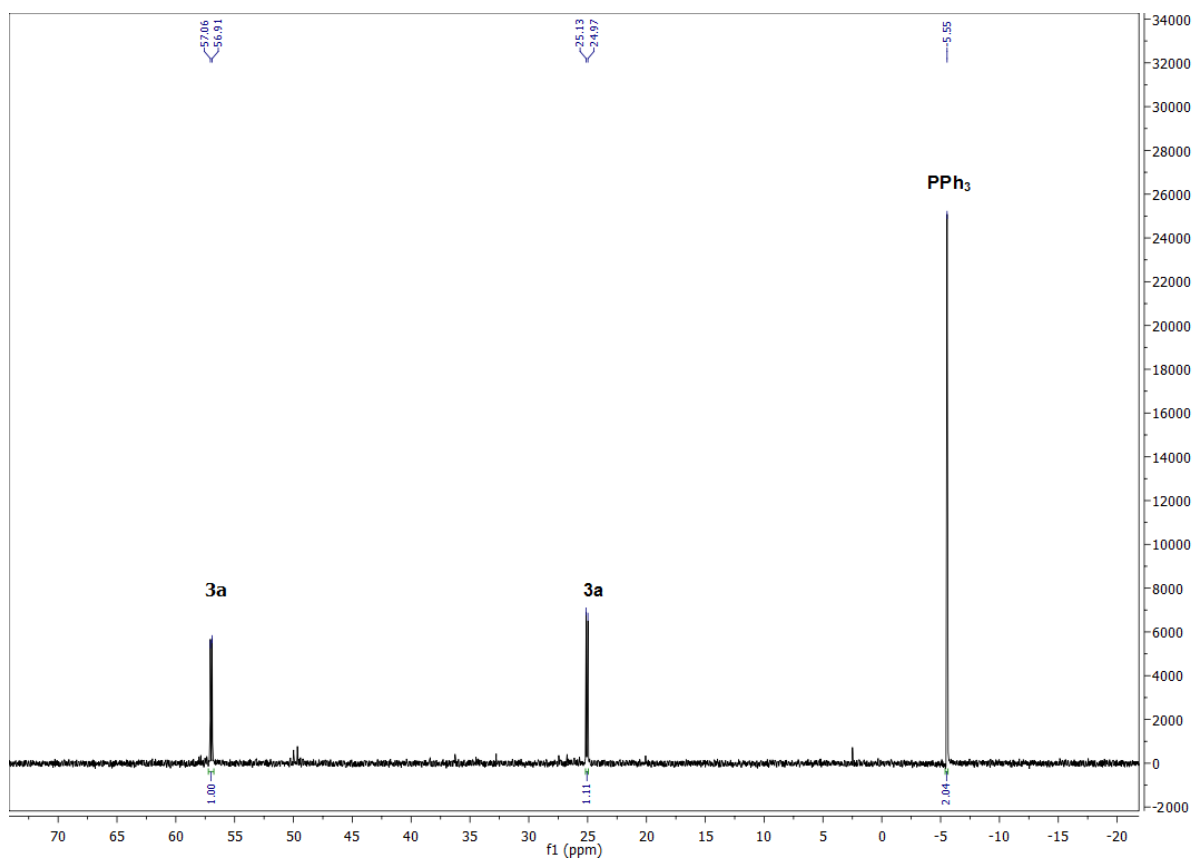

Figure S27:  $^{31}\text{P}$  NMR control experiment showing full substitution of  $\text{PPh}_3$  with  $\text{L}_{\text{Dipp}}$ , during preparation of **3a**.

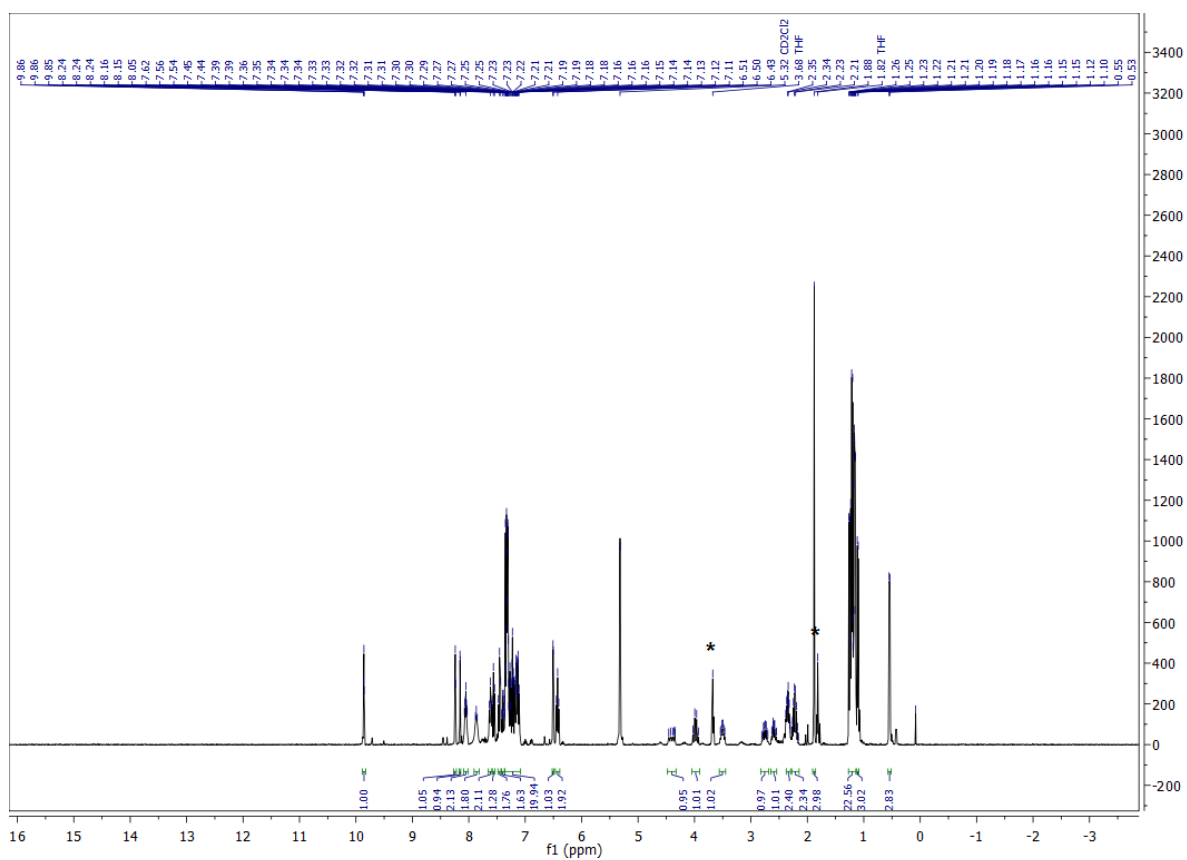

Figure S28:  $^1\text{H}$  NMR (400 MHz,  $\text{CD}_2\text{Cl}_2$ , 300 K) spectrum of **3b** with low formation of **3**. Residual THF marked with asterisks (\*).

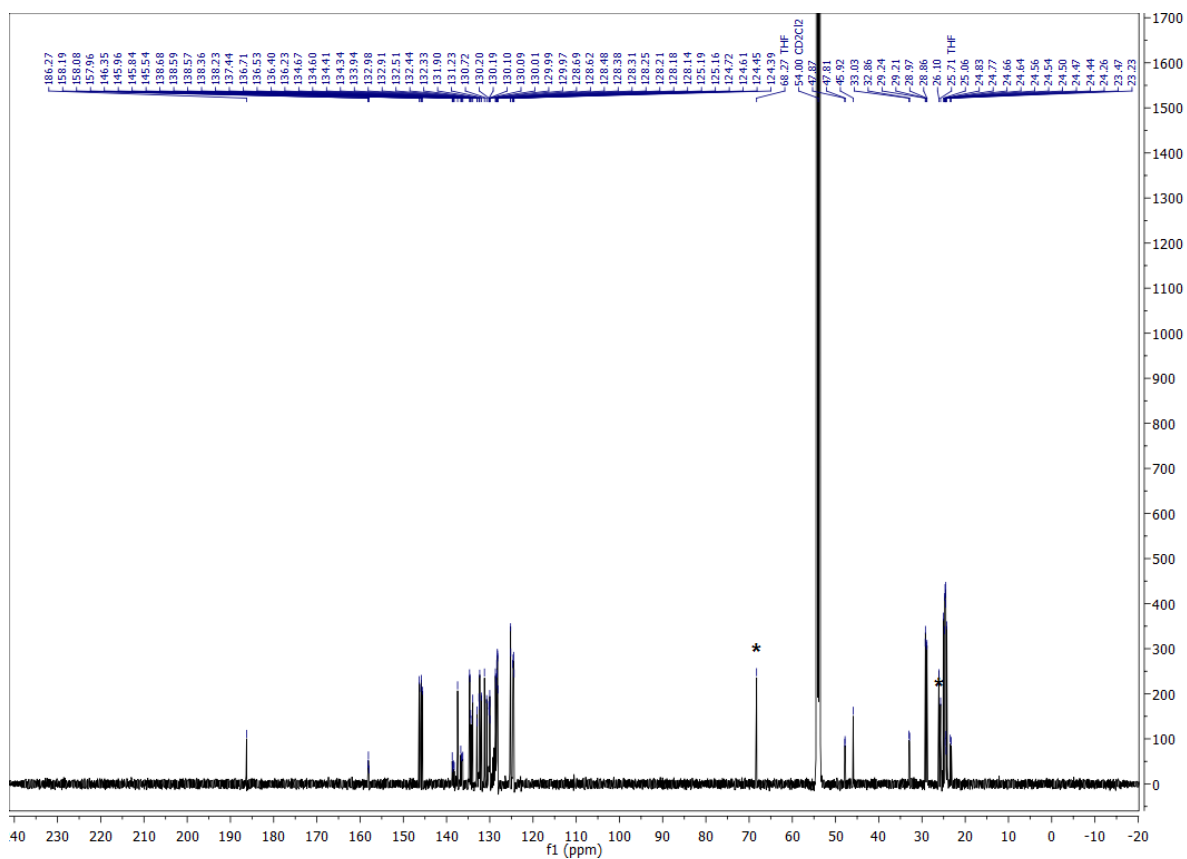

Figure S29:  $^{13}\text{C}$  NMR (125 MHz,  $\text{CD}_2\text{Cl}_2$ , 300 K) spectrum of **3b** with low formation of **3**. Residual THF marked with asterisks (\*).

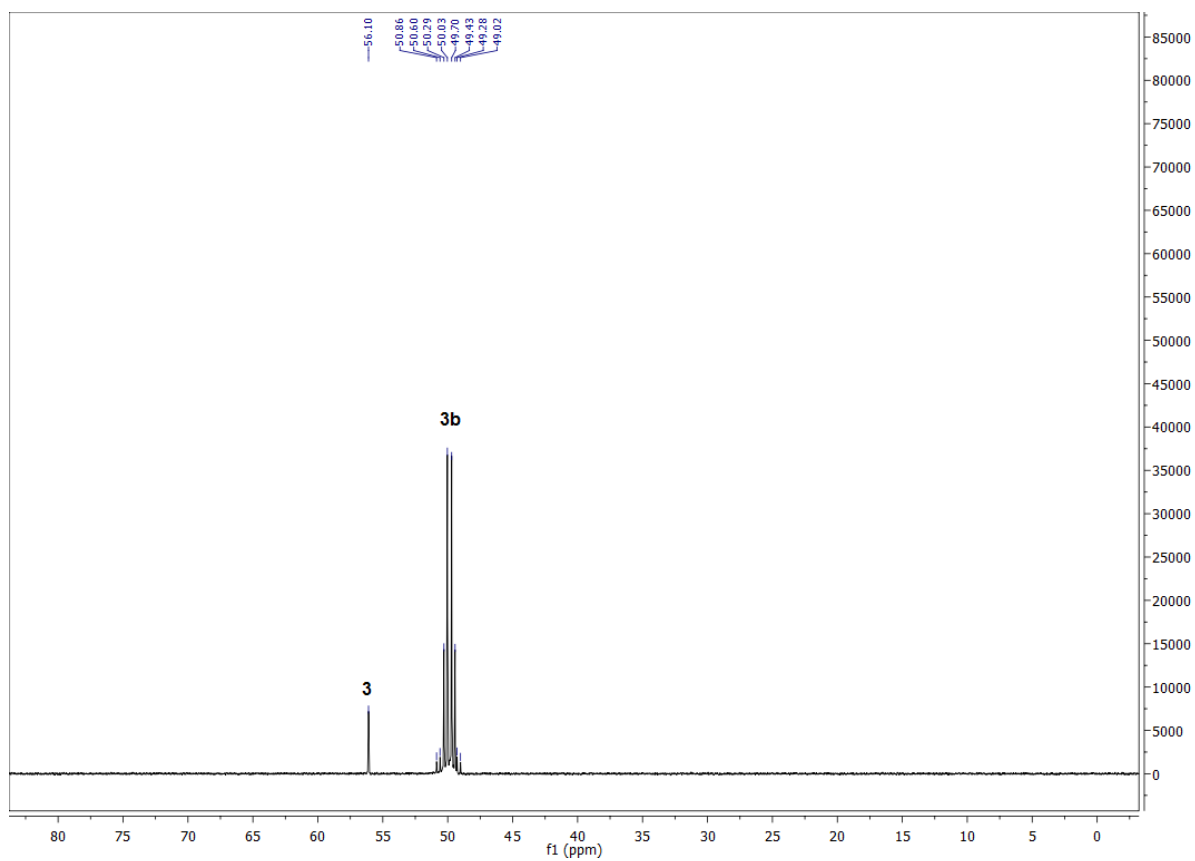

Figure S30:  $^{31}\text{P}$  NMR (162 MHz,  $\text{CD}_2\text{Cl}_2$ , 300 K) spectrum of **3b** with low formation of **3**.



## Single Crystal X-Ray Structure Determination

The single crystal was grown by layering a solution of complex **3** in dichloromethane and a drop of benzene with *n*-pentane. X-ray crystallographic data was collected on a single crystal x-ray diffractometer with the following setup: A CMOS detector (Bruker APEX III,  $\kappa$ -CMOS), a TXS rotating anode and a Helios optic using the APEX3 software package.<sup>5</sup> The measurement used MoK $\alpha$  radiation ( $\lambda = 0.71073 \text{ \AA}$ ) and was performed on a single crystal coated with perfluorinated ether. The crystal was fixed on top of a micromount sample holder and frozen under a stream of cold nitrogen at 100 K. A matrix scan was used to determine the initial lattice parameters. Reflections were corrected for Lorentz and polarisation effects, scan speed, and background using SAINT.<sup>6</sup> Absorption corrections, including odd and even ordered spherical harmonics were performed using SADABS.<sup>7</sup> Space group assignment was based upon systematic absences, E statistics, and successful refinement of the structure. The structure was solved by direct methods (SHELXT) with the aid of successive difference Fourier maps, and was refined against all data using SHELXL-2015 in conjunction with SHELXLE.<sup>8</sup> Hydrogen atoms were calculated in ideal positions as follows: Methyl hydrogen atoms were refined as part of rigid rotating groups, with a C–H distance of 0.98  $\text{\AA}$  and  $U_{\text{iso(H)}} = 1.5 \cdot U_{\text{eq(C)}}$ . Other H atoms were placed in calculated positions and refined using a riding model, with methylene and aromatic C–H distances of 0.99  $\text{\AA}$  and 0.95  $\text{\AA}$ , respectively, other C–H distances of 1.00  $\text{\AA}$  and  $U_{\text{iso(H)}} = 1.2 \cdot U_{\text{eq(C)}}$ . Non-hydrogen atoms were refined with anisotropic displacement parameters. Full-matrix least-squares refinements were carried out by minimizing  $\sum w(F_o^2 - F_c^2)^2$  with SHELXL weighting scheme. Neutral atom scattering factors for all atoms and anomalous dispersion corrections for the non-hydrogen atoms were taken from *International Tables for Crystallography*.<sup>9</sup> The image of the crystal structure was generated with Mercury.<sup>10</sup> CCDC 2163076 contains the supplementary crystallographic data for this paper. This data can be obtained free of charge *via* [www.ccdc.cam.ac.uk/data\\_request/cif](http://www.ccdc.cam.ac.uk/data_request/cif), or by emailing [data\\_request@ccdc.cam.ac.uk](mailto:data_request@ccdc.cam.ac.uk), or by contacting The Cambridge Crystallographic Data Centre, 12 Union Road, Cambridge CB2 1EZ, UK; fax: +44 1223 336033.

**Table S1:** Crystallographic Data of Complex **3** CCDC: 2163076.

| Sample and Crystal Data                  |                                                                                                                                                               |
|------------------------------------------|---------------------------------------------------------------------------------------------------------------------------------------------------------------|
| Chemical formula                         | C <sub>66</sub> H <sub>81</sub> BrCl <sub>12</sub> N <sub>4</sub> O <sub>2</sub> P <sub>2</sub> Ru                                                            |
| Formula weight                           | 1630.66 g·mol <sup>-1</sup>                                                                                                                                   |
| Temperature                              | 100(2) K                                                                                                                                                      |
| Wavelength                               | 0.71073 Å                                                                                                                                                     |
| Crystal size                             | 0.286 mm x 0.300 mm x 0.430 mm                                                                                                                                |
| Crystal habit                            | clear yellow fragment                                                                                                                                         |
| Crystal System                           | triclinic                                                                                                                                                     |
| Space group                              | P 1                                                                                                                                                           |
| Unit cell dimensions                     | a = 11.3315(7) Å      α = 77.650(3) °<br>b = 12.2669(8) Å      β = 88.094(3) °<br>c = 14.2038(10) Å     γ = 75.630(2) °                                       |
| Volume                                   | 1867.9(2) Å <sup>3</sup>                                                                                                                                      |
| Z                                        | 1                                                                                                                                                             |
| Density (calculated)                     | 1.450 g·cm <sup>-3</sup>                                                                                                                                      |
| Absorption coefficient                   | 1.261 mm <sup>-1</sup>                                                                                                                                        |
| F(000)                                   | 834                                                                                                                                                           |
| Data Collection and Structure Refinement |                                                                                                                                                               |
| Diffractometer                           | Bruker D8 Venture                                                                                                                                             |
| Radiation Source                         | TXS rotating anode, Mo                                                                                                                                        |
| Theta range for data collection          | 2.34 to 25.35 °                                                                                                                                               |
| Index ranges                             | -13<=h<=13, -14<=k<=14, -17<=l<=17                                                                                                                            |
| Reflections collected                    | 77741                                                                                                                                                         |
| Independent reflections                  | 13197 [R(int) = 0.0363]                                                                                                                                       |
| Coverage of independent reflections      | 99.8%                                                                                                                                                         |
| Absorption correction                    | Multi-Scan                                                                                                                                                    |
| Max. and min. transmission               | 0.7140 and 0.6130                                                                                                                                             |
| Structure solution technique             | Direct methods                                                                                                                                                |
| Structure solution program               | SHELXT 2018/2 (Sheldrick, 2018)                                                                                                                               |
| Function minimized                       | Full-matrix least-squares on F <sup>2</sup>                                                                                                                   |
| Refinement program                       | SHELXL-2018/3 (Sheldrick, 2018)                                                                                                                               |
| Data / restraints / parameters           | 13197 / 690 / 988                                                                                                                                             |
| Goodness-of-fit on F <sup>2</sup>        | 1.058                                                                                                                                                         |
| Final R indices                          | 12932 data; I>2σ(I); R1 = 0.0359, wR2 = 0.0961<br>all data R1 = 0.0369, wR2 = 0.0973                                                                          |
| Weighting scheme                         | w=1/[σ <sup>2</sup> (F <sub>o</sub> <sup>2</sup> )+(0.0618P) <sup>2</sup> +2.1130P]<br>where P=(F <sub>o</sub> <sup>2</sup> +2F <sub>c</sub> <sup>2</sup> )/3 |
| Absolute structure parameter             | 0.4(0)                                                                                                                                                        |
| Largest diff. max. min.                  | 0.904 and -0.805 eÅ <sup>-3</sup>                                                                                                                             |
| R.M.S. deviation from mean               | 0.089 eÅ <sup>-3</sup>                                                                                                                                        |

### **General Procedure for Catalytic Transfer Hydrogenation Reactions**

In a typical experiment, a schlenk-tube (25.0 mL) is charged with catalyst stock solution (in *iso*-propanol, 1.00 mM) according to the desired loading. Acetophenone (116.7  $\mu$ L, 1.00 mmol) and *iso*-propanol (so that total volume equals 10.0 mL) are added. A small syringe is inserted through a septum with a long cannula. The argon valve (0.30 bar) is left open during the entire reaction for a constant overpressure. The mixture is stirred and heated to the desired temperature for 2 min. The reaction is started by addition of a 0.1 M solution of NaO<sup>*i*</sup>Pr in *iso*-propanol (200  $\mu$ L, 0.02 mmol, 2.00 mol%). Samples (0.50 mL) are taken at defined intervals using the syringe. The cannula is not removed from the reaction flask during this process, instead the syringe is detached from the cannula. The samples are quenched in a cooling solution (0 °C) of diethylether and filtered over a short pad of silica to remove residual catalyst. Analysis is performed *via* gas chromatography. Blanc experiments without catalyst or without base show no conversion within the investigated reaction times.

### **General Procedure for Catalytic Oppenauer-type Oxidation Reactions**

In a typical experiment, a schlenk-tube (25.0 mL) is charged with catalyst stock solution (in DCM, 1.00 mM) according to the desired loading and the solvent removed under reduced pressure. KO<sup>*t*</sup>Bu (1.12 mg, 0.01 mmol, 2.00 mol%), substrate (0.50 mmol) and <sup>*t*</sup>BuOH (so that total volume equals 5.00 mL) are added. A small syringe is inserted through a septum with a long cannula. The argon valve (0.30 bar) is left open during the entire reaction for a constant overpressure. The mixture is stirred and heated to the desired temperature for 2 min. The reaction is started by addition of acetone (0.20 mL, 2.72 mmol). Samples (0.50 mL) are taken at defined intervals using the syringe. The cannula is not removed from the reaction flask during this process, instead the syringe is detached from the cannula. The samples are quenched in a cooling solution (0 °C) of diethylether and filtered over a short pad of silica to remove residual catalyst. Analysis is performed *via* gas chromatography. Blanc experiments without catalyst or without base show no conversion within the investigated reaction times.

### **TOF Calculations**

For reactions reaching near to full conversion, calculation at the slope at 50% conversion (TOF<sub>50</sub>, representing steepest slope), were calculated as “initial” TOFs. For lower conversions or long induction periods, in which this would misrepresent the “initial” TOF, the steepest slope of the kinetic curve was used for calculations, allowing for valid comparison of all results.

## Catalytic Results

### Transfer Hydrogenation

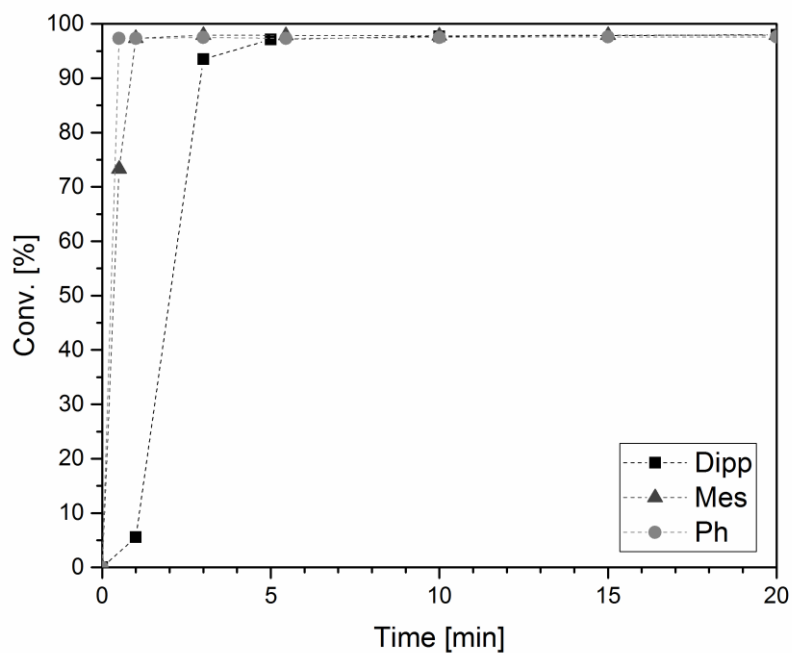

**Figure S31:** Catalytic TH of acetophenone with complexes **1**, **2** and **3** (Ph, Mes, Dipp respectively) at 80 °C with NaOiPr (2.00 mol%) in *iso*-propanol at S/C = 1 000.

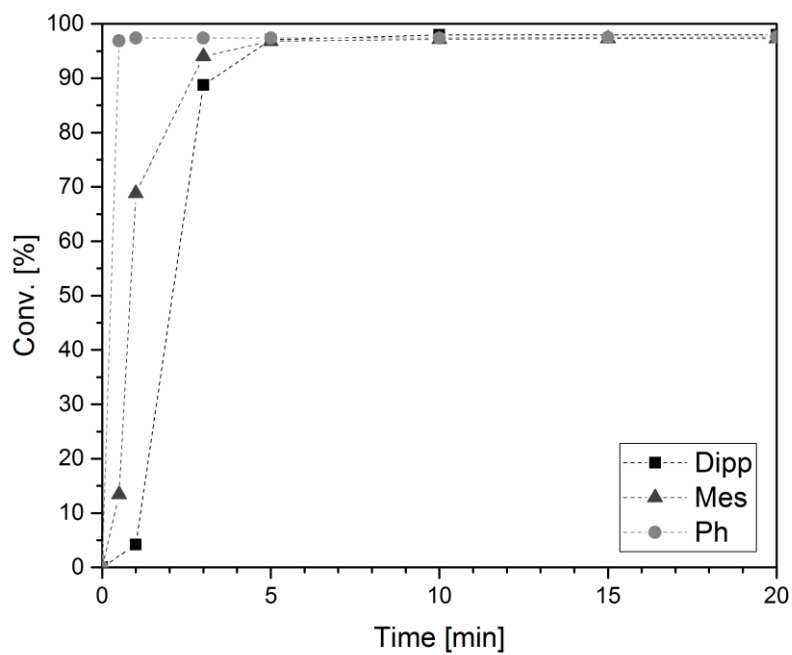

**Figure S32:** Catalytic TH of acetophenone with complexes **1**, **2** and **3** (Ph, Mes, Dipp respectively) at 80 °C with NaOiPr (2.00 mol%) in *iso*-propanol at S/C = 2 000.

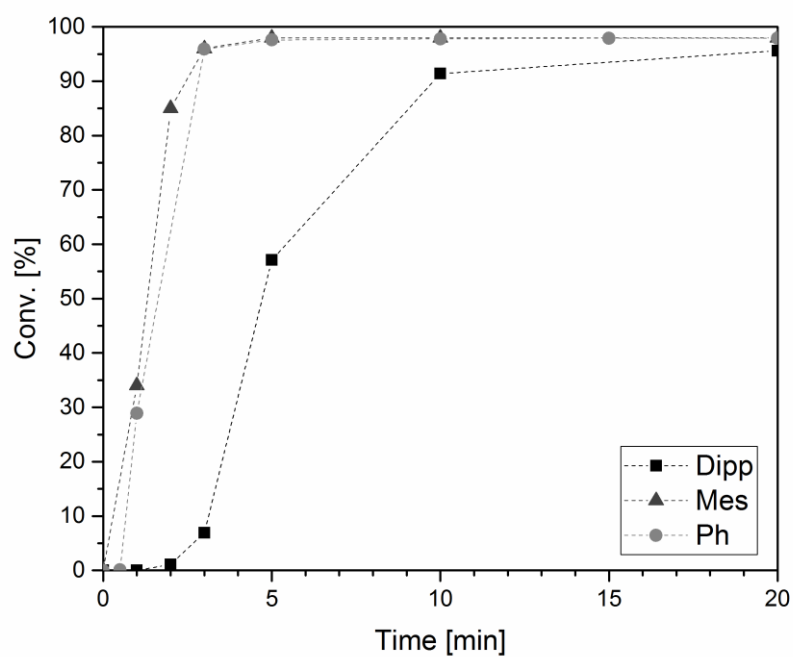

**Figure S33:** Catalytic TH of acetophenone with complexes **1**, **2** and **3** (Ph, Mes, Dipp respectively) at 80 °C with NaOiPr (2.00 mol%) in *iso*-propanol at S/C = 10 000.

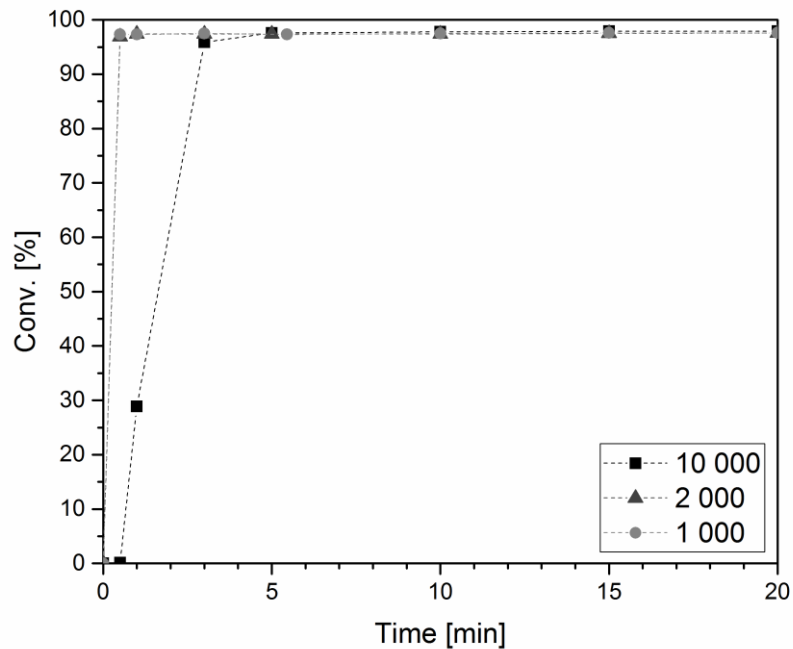

**Figure S34:** Catalytic TH of acetophenone with complex **1** (Ph) at 80 °C with NaOiPr (2.00 mol%) in *iso*-propanol at S/C = 1 000, 2 000 and 10 000.

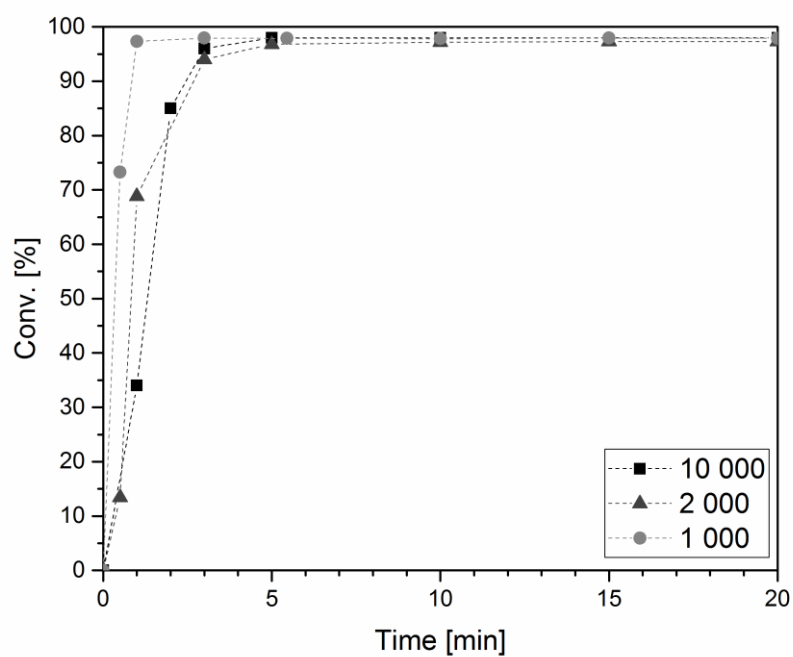

**Figure S35:** Catalytic TH of acetophenone with complex **2** (Mes) at 80 °C with NaOiPr (2.00 mol%) in *iso*-propanol at S/C = 1 000, 2 000 and 10 000.

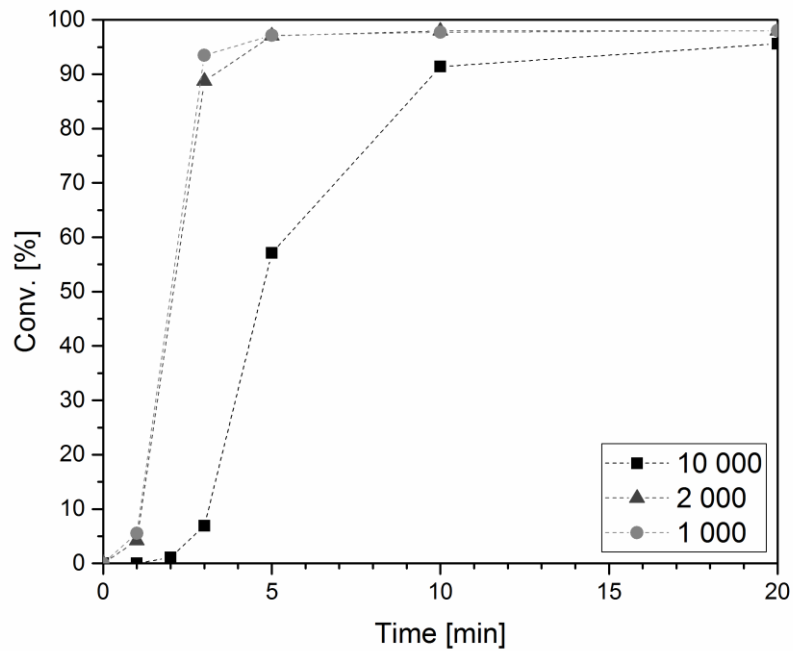

**Figure S36:** Catalytic TH of acetophenone with complex **3** (Dipp) at 80 °C with NaOiPr (2.00 mol%) in *iso*-propanol at S/C = 1 000, 2 000 and 10 000.

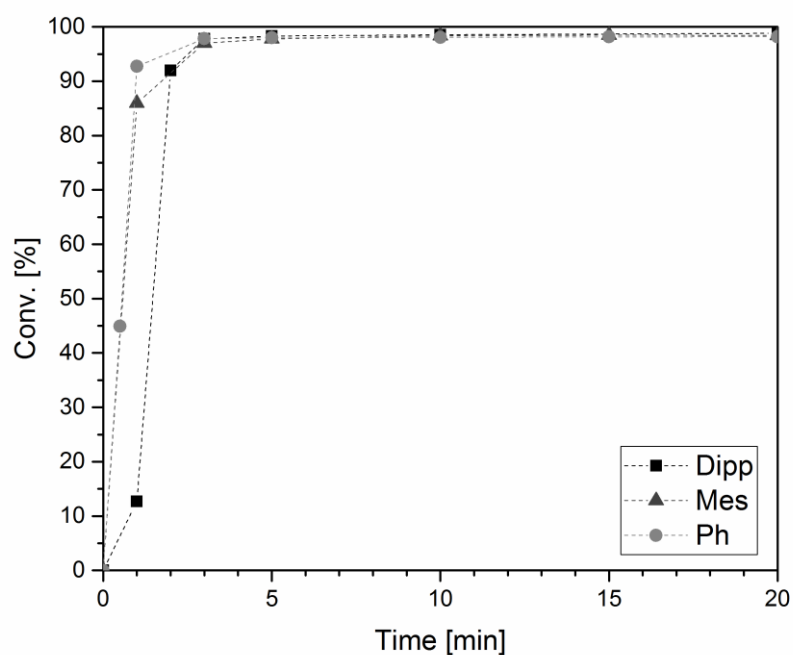

**Figure S37:** Catalytic TH of acetophenone with complexes **1**, **2** and **3** (Ph, Mes, Dipp respectively) at S/C = 10 000 with NaO*i*Pr (2.00 mol%) in *iso*-propanol at 90 °C.

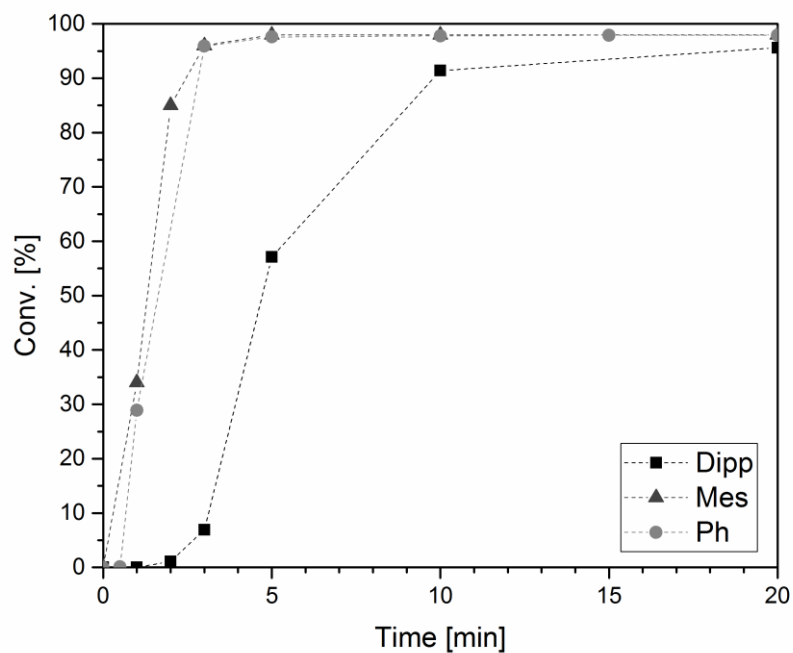

**Figure S38:** Catalytic TH of acetophenone with complexes **1**, **2** and **3** (Ph, Mes, Dipp respectively) at S/C = 10 000 with NaO*i*Pr (2.00 mol%) in *iso*-propanol at 80 °C.

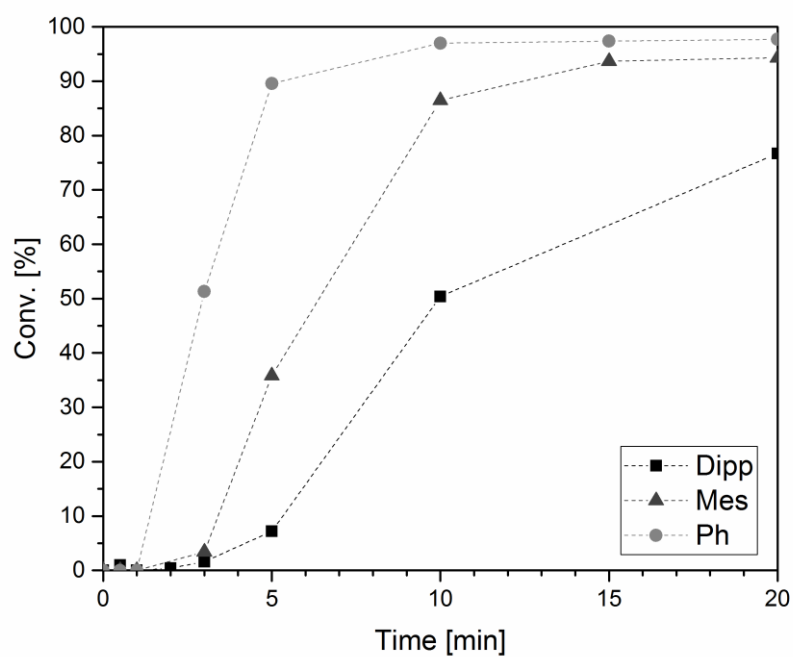

**Figure S39:** Catalytic TH of acetophenone with complexes **1**, **2** and **3** (Ph, Mes, Dipp respectively) at S/C = 10 000 with NaOiPr (2.00 mol%) in *iso*-propanol at 70 °C.

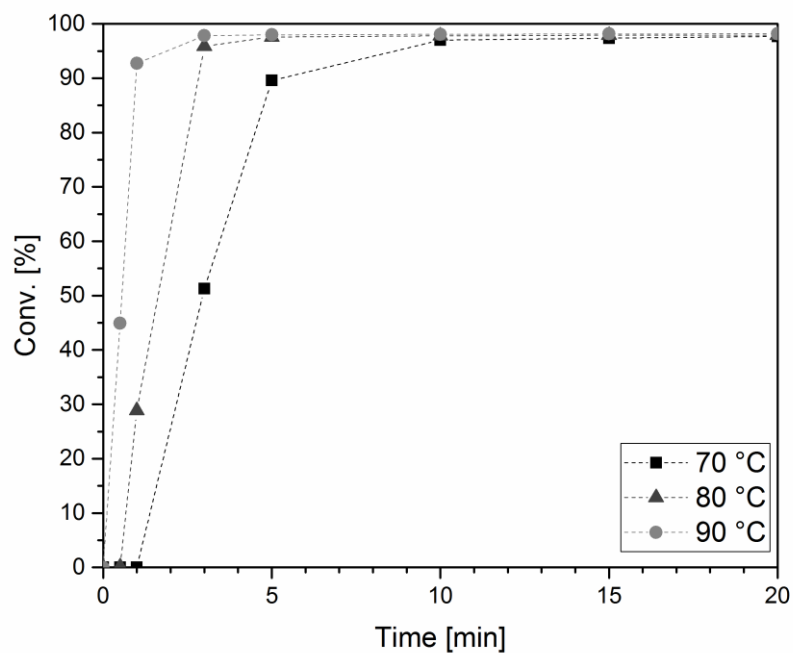

**Figure S40:** Catalytic TH of acetophenone with complex **1** (Ph) at S/C = 10 000 with NaOiPr (2.00 mol%) in *iso*-propanol at 70 °C, 80 °C and 90 °C.



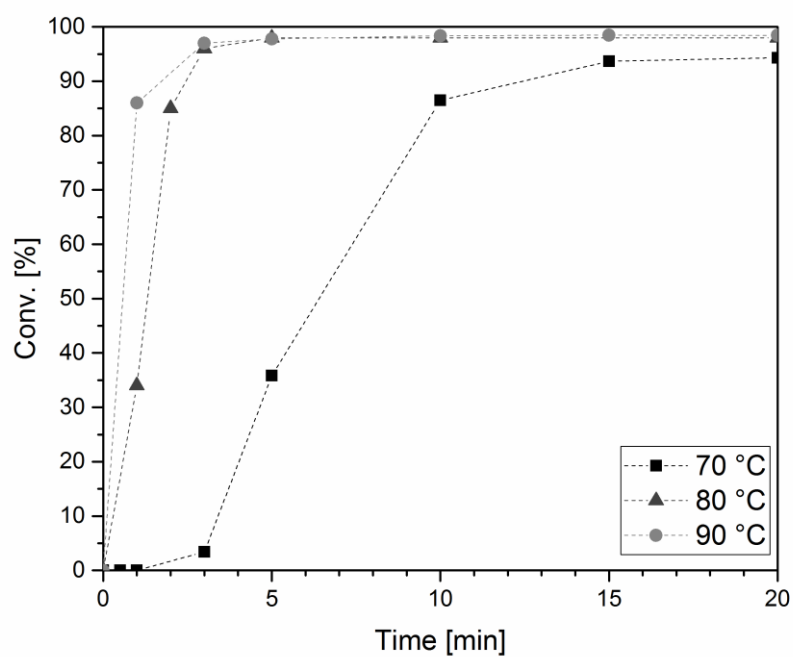

**Figure S41:** Catalytic TH of acetophenone with complex **2** (Mes) at S/C = 10 000 with NaOiPr (2.00 mol%) in *iso*-propanol at 70 °C, 80 °C and 90 °C.

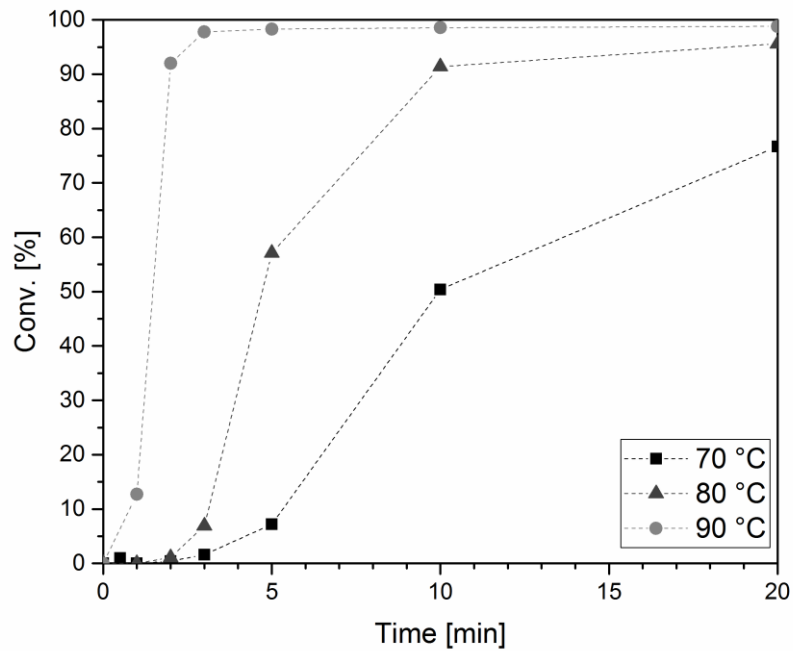

**Figure S42:** Catalytic TH of acetophenone with complex **3** (Dipp) at S/C = 10 000 with NaOiPr (2.00 mol%) in *iso*-propanol at 70 °C, 80 °C and 90 °C.

**Table S2:** Activities of various ruthenium NHC complexes in TH reactions with acetophenone (AcPh) and *p*-chloroacetophenone (*p*-Cl-AcPh) as model substrates.

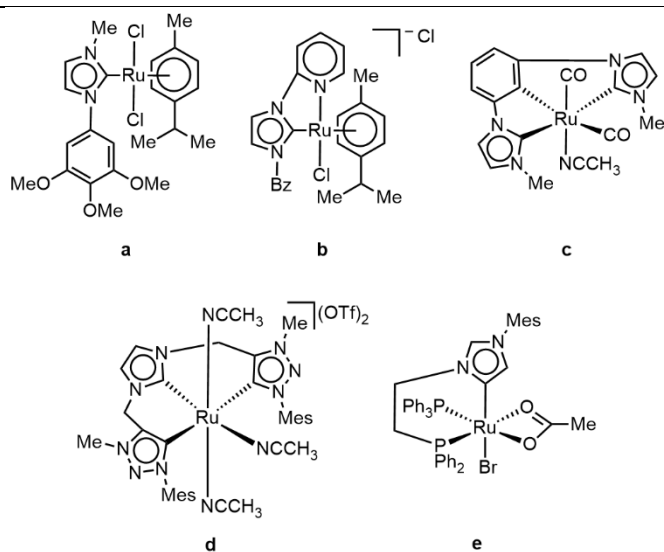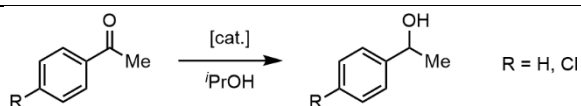

| Complex                | Substrate         | Loading [mol%] | TOF [h <sup>-1</sup> ] | Conversion [%] | Time [min] |
|------------------------|-------------------|----------------|------------------------|----------------|------------|
| <b>a</b> <sup>11</sup> | AcPh              | 0.75           | 256                    | 96             | 30         |
|                        | <i>p</i> -Cl-AcPh | 0.03           | 5 200                  | 65             | 30         |
| <b>b</b> <sup>12</sup> | AcPh              | 0.50           | 199                    | 99             | 120        |
| <b>c</b> <sup>13</sup> | AcPh              | 0.01           | 2 467                  | 74             | 180        |
| <b>d</b> <sup>14</sup> | AcPh              | 0.50           | 580                    | 98             | 80         |
| <b>e</b> <sup>15</sup> | AcPh              | 0.05           | 38 000                 | 97             | 120        |
|                        | AcPh*             | 0.01           | 140 000                | 86             | 60         |

\*Ethylenediamine (EDA) as additive.

## Oppenauer-Type Oxidation

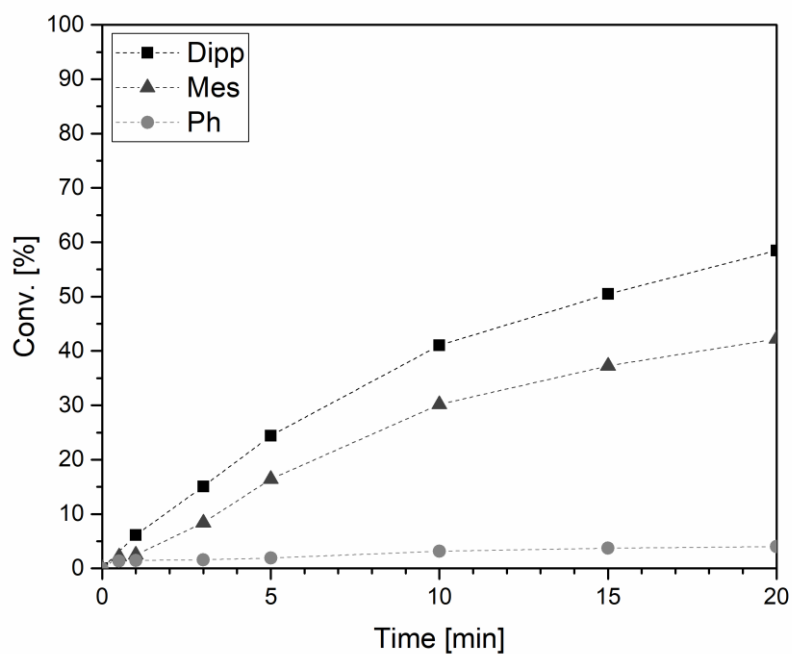

**Figure S43:** Catalytic *Oppenauer*-type oxidation of  $\alpha$ -tetralol with complexes **1**, **2** and **3** (Ph, Mes, Dipp respectively) at  $S/C = 10\ 000$  with  $KO^tBu$  (2.00 mol%) and acetone (6 eq.) in  $tBuOH$  at  $40\ ^\circ C$ .

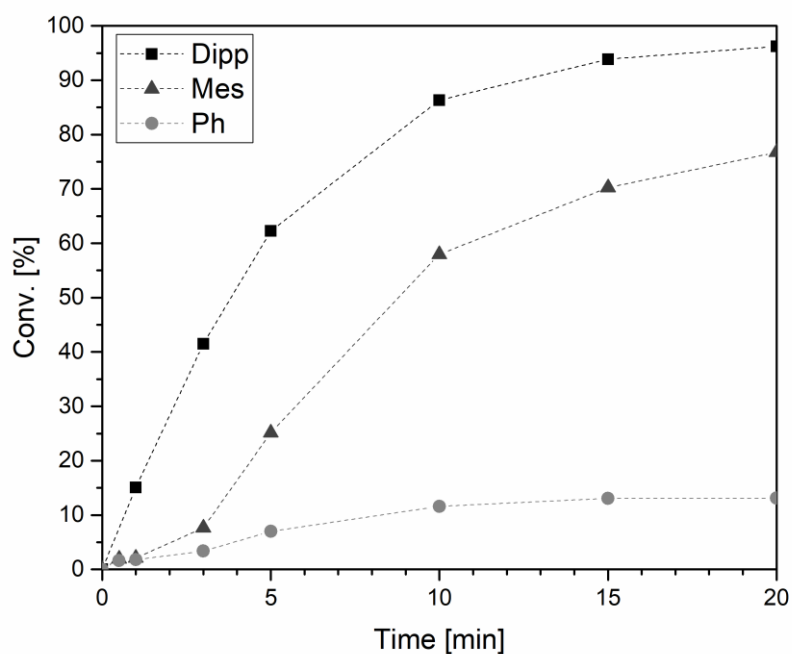

**Figure S44:** Catalytic *Oppenauer*-type oxidation of  $\alpha$ -tetralol with complexes **1**, **2** and **3** (Ph, Mes, Dipp respectively) at  $S/C = 10\ 000$  with  $KO^tBu$  (2.00 mol%) and acetone (6 eq.) in  $tBuOH$  at  $50\ ^\circ C$ .

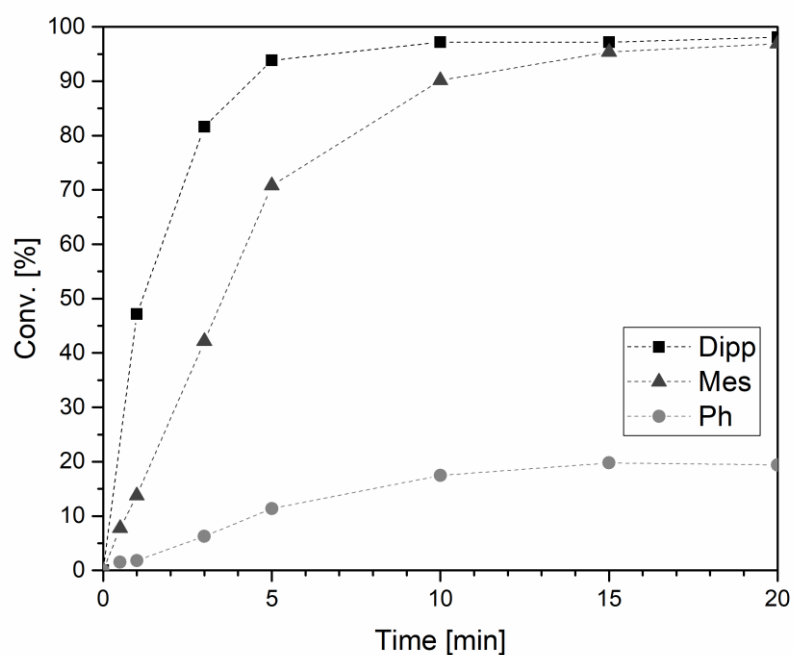

**Figure S45:** Catalytic *Oppenauer*-type oxidation of  $\alpha$ -tetralol with complexes **1**, **2** and **3** (Ph, Mes, Dipp respectively) at S/C = 10 000 with KO<sup>t</sup>Bu (2.00 mol%) and acetone (6 eq.) in <sup>t</sup>BuOH at 60 °C.

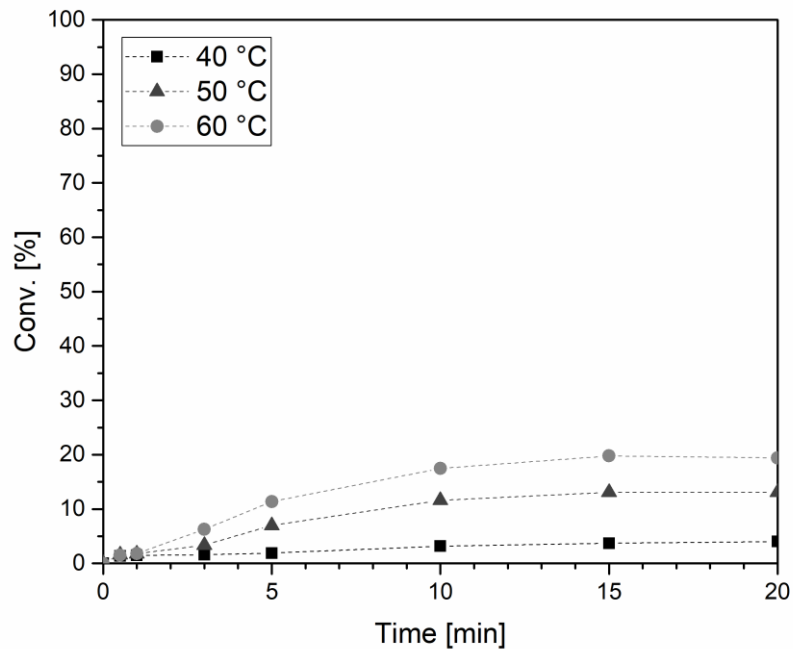

**Figure S46:** Catalytic *Oppenauer*-type oxidation of  $\alpha$ -tetralol with complex **1** (Ph) at S/C = 10 000 with KO<sup>t</sup>Bu (2.00 mol%) and acetone (6 eq.) in <sup>t</sup>BuOH at 40 °C, 50 °C and 60 °C.

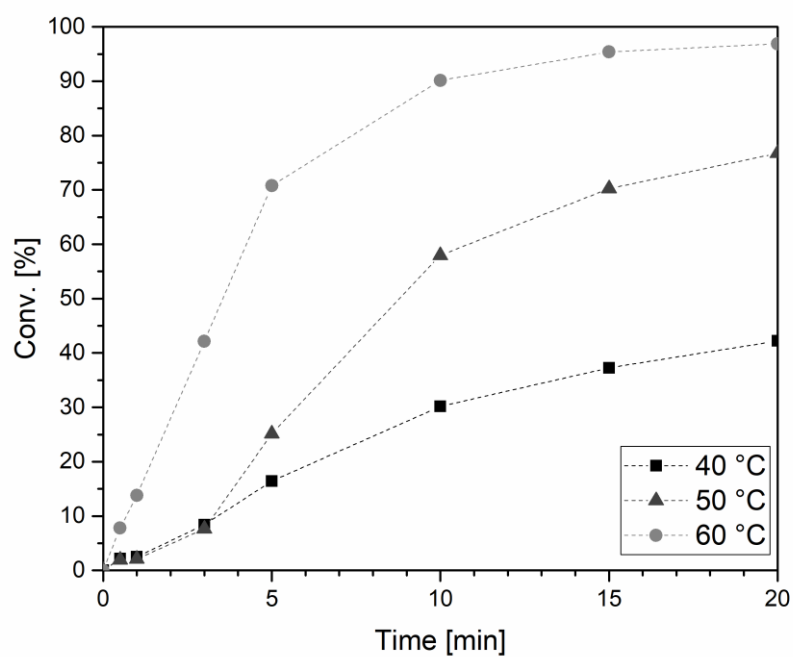

**Figure S47:** Catalytic *Oppenauer*-type oxidation of  $\alpha$ -tetralol with complex **2** (Mes) at S/C = 10 000 with KO<sup>t</sup>Bu (2.00 mol%) and acetone (6 eq.) in <sup>t</sup>BuOH at 40 °C, 50 °C and 60 °C.

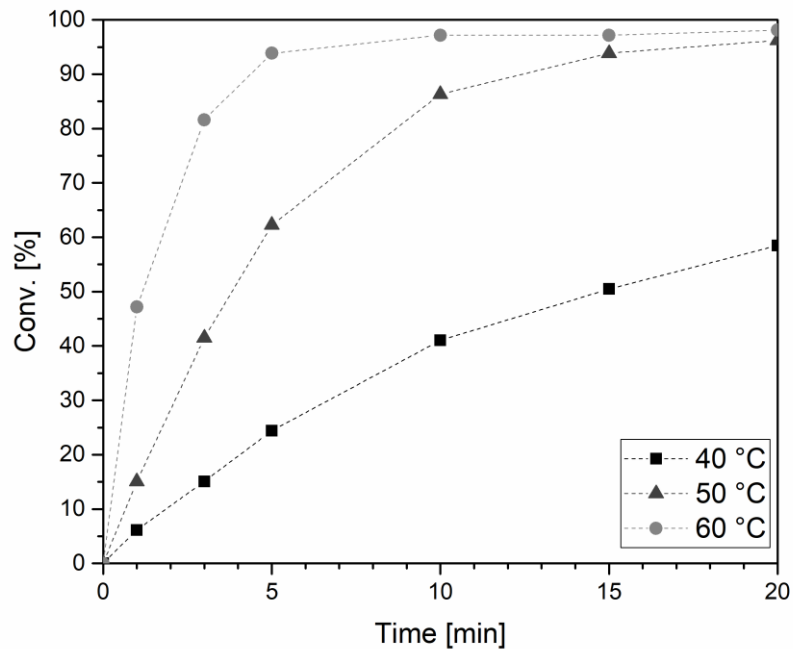

**Figure S48:** Catalytic *Oppenauer*-type oxidation of  $\alpha$ -tetralol with complex **3** (Dipp) at S/C = 10 000 with KO<sup>t</sup>Bu (2.00 mol%) and acetone (6 eq.) in <sup>t</sup>BuOH at 40 °C, 50 °C and 60 °C.

**Table S3:** Activities of various ruthenium complexes in *Oppenauer*-type oxidation reactions with various substrates.

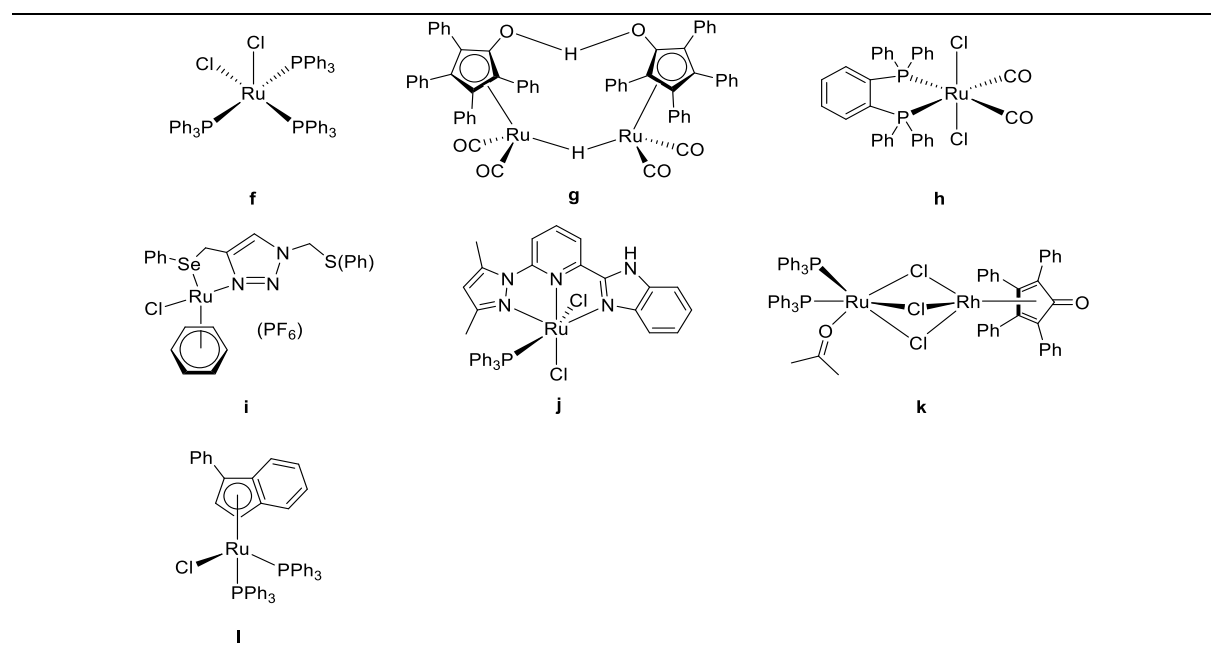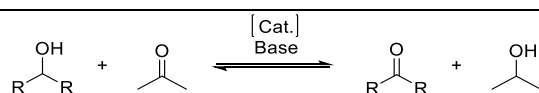

| Complex                | Substrate          | Loading [mol%] | TOF [h <sup>-1</sup> ] | Conversion [%] | Time [h] |
|------------------------|--------------------|----------------|------------------------|----------------|----------|
| <b>f</b> <sup>16</sup> | $\alpha$ -Tetralol | 0.1            | n.a. <sup>a</sup>      | 90             | 7        |
|                        | 1-Indanol          | 0.1            | 1 500                  | 90             | 1.5      |
| <b>g</b> <sup>16</sup> | 1-Indanol          | 0.1            | n.a. <sup>a</sup>      | 87             | 17       |
| <b>h</b> <sup>17</sup> | Cyclohexanol       | 0.1            | n.a. <sup>a</sup>      | 91             | 6        |
| <b>i</b> <sup>18</sup> | Benzylalcohol      | 0.1            | 2 300 <sup>b</sup>     | 98             | 3        |
| <b>j</b> <sup>19</sup> | $\alpha$ -Tetralol | 0.5            | 792                    | 99             | 0.25     |
| <b>k</b> <sup>20</sup> | 1-Indanol          | 0.1            | n.a. <sup>a</sup>      | 96             | 24       |
| <b>l</b> <sup>21</sup> | 1-Indanol          | 0.5            | 200                    | 99             | 1        |

<sup>a</sup>Not available/not reported by source. <sup>b</sup>Calculated manually from NMR conversion measurement.

## DFT - Computational Structure Calculations

### General Remarks

DFT calculations were performed with Gaussian-16<sup>22</sup> and processed using GaussView-6.<sup>23</sup> Calculations were performed in a gas atmosphere, initial parameters were imported from the optimized DFT structure of the previously reported complex  $\kappa^2$ -acetato-*bis*-( $\kappa^2$ -(1-(mesityl)-3-(2-diphenylphosphinoethyl)-imidazolium)-ruthenium(II) bromide **2**<sup>3a</sup> and the wingtip structures altered to fit the wingtip structure of the desired complexes **1** or **3** (from mesityl to phenyl and di-*iso*-propylphenyl, respectively) in the GaussView-6 software. The same procedure was applied to the hydride analogues **1<sub>H</sub>** and **3<sub>H</sub>**, starting from the previously reported hydride **2<sub>H</sub>**.<sup>3a</sup> Geometry optimizations were obtained without using constraint coordinates. The obtained structures are true ground states as no negative eigenvalues were found during vibrational analysis. In accordance to previous calculations,<sup>3a</sup> the pure functional B97D3<sup>24</sup> was used. The basis set def2-SVP was applied to small atoms.<sup>25</sup> Ru was treated by the Stuttgart/Dresden 1997 SDD relativistic effective core potential (ECP) and its respective basis set.<sup>26</sup> The para-methyl groups of the mesityl moieties were removed from **2** and **2<sub>H</sub>** to facilitate convergence.

### Coordinate Tables

**Table S4:** Coordinates of **1** calculated with B97D3/def2-SVP (charge 1, multiplicity 1, SCF: E = -3000.33 h).

| Atom | Coordinates [Å] |           |           |
|------|-----------------|-----------|-----------|
|      | x               | y         | z         |
| Ru   | -0.001152       | -0.721289 | 0.003788  |
| N    | -2.163494       | -0.506085 | 2.296147  |
| C    | -1.855528       | -0.828043 | 0.954733  |
| P    | 0.768749        | 0.805581  | 1.448612  |
| P    | -0.773700       | 0.792691  | -1.453005 |
| N    | -4.066447       | -1.112273 | 1.427994  |
| C    | -3.479039       | -0.670762 | 2.560583  |
| H    | -3.990097       | -0.454328 | 3.497542  |
| O    | 0.493670        | -2.681031 | 0.991710  |
| O    | -0.492962       | -2.688521 | -0.969948 |
| C    | -0.429081       | 1.196258  | 2.833404  |
| H    | 0.129943        | 1.621924  | 3.683758  |
| H    | -1.148202       | 1.950190  | 2.473725  |
| C    | 1.853807        | -0.833697 | -0.946759 |
| C    | 3.477425        | -0.683968 | -2.553380 |
| H    | 3.988200        | -0.472851 | -3.491717 |
| C    | -3.085322       | -1.223557 | 0.440289  |

|   |           |           |           |
|---|-----------|-----------|-----------|
| H | -3.338545 | -1.587124 | -0.551734 |
| N | 2.161367  | -0.520910 | -2.290497 |
| C | -1.184031 | -0.054459 | 3.290116  |
| H | -0.488400 | -0.887983 | 3.488429  |
| H | -1.730055 | 0.150245  | 4.226344  |
| N | 4.065669  | -1.116104 | -1.417588 |
| C | 3.084437  | -1.222976 | -0.429406 |
| H | 3.338424  | -1.577859 | 0.565573  |
| C | 1.180923  | -0.078762 | -3.287800 |
| H | 0.486852  | -0.915143 | -3.479314 |
| H | 1.726443  | 0.119517  | -4.225705 |
| C | 0.423732  | 1.174152  | -2.840851 |
| H | -0.135850 | 1.592109  | -3.694652 |
| H | 1.141559  | 1.932135  | -2.487089 |
| C | -5.463827 | -1.358664 | 1.242006  |
| C | -6.211999 | -1.985367 | 2.251724  |
| C | -7.580661 | -2.210449 | 2.050907  |
| H | -8.167760 | -2.701209 | 2.835118  |
| C | -8.191426 | -1.829761 | 0.846108  |
| C | -7.430307 | -1.215944 | -0.160862 |
| H | -7.902594 | -0.915499 | -1.102918 |
| C | -6.064592 | -0.970998 | 0.031777  |
| C | 5.463543  | -1.358023 | -1.229367 |
| C | 6.062805  | -0.961146 | -0.021369 |
| C | 7.428912  | -1.202009 | 0.173633  |
| H | 7.900023  | -0.894394 | 1.113959  |
| C | 8.191882  | -1.820871 | -0.828840 |
| C | 7.582635  | -2.210658 | -2.031498 |
| H | 8.171232  | -2.705242 | -2.812174 |
| C | 6.213626  | -1.989715 | -2.234567 |
| C | 2.283038  | 2.518066  | -0.154786 |
| H | 2.664040  | 1.580530  | -0.570000 |
| C | 2.761389  | 3.744462  | -0.631242 |
| H | 3.510851  | 3.763766  | -1.431638 |
| C | 2.287916  | 4.946589  | -0.080333 |
| H | 2.657771  | 5.908179  | -0.454238 |
| C | 1.344298  | 4.908525  | 0.954832  |
| H | 0.967453  | 5.841042  | 1.389870  |
| C | 0.869615  | 3.679751  | 1.437973  |
| H | 0.129550  | 3.682346  | 2.242176  |
| C | 1.325096  | 2.472138  | 0.880600  |
| C | 3.346140  | 1.104470  | 2.678125  |
| H | 3.328906  | 2.140133  | 2.326070  |
| C | 4.467189  | 0.637264  | 3.381883  |
| H | 5.308532  | 1.315097  | 3.569623  |
| C | 4.511189  | -0.686139 | 3.845736  |
| H | 5.388524  | -1.050056 | 4.393183  |



|   |           |           |           |
|---|-----------|-----------|-----------|
| C | 3.423216  | -1.539790 | 3.606033  |
| H | 3.448168  | -2.576671 | 3.961476  |
| C | 2.304281  | -1.080779 | 2.895428  |
| H | 1.496193  | -1.777943 | 2.659916  |
| C | 2.256648  | 0.247418  | 2.419675  |
| C | -2.260675 | 0.224413  | -2.419531 |
| C | -2.305266 | -1.107042 | -2.886369 |
| H | -1.495334 | -1.800632 | -2.646713 |
| C | -3.423478 | -1.573601 | -3.593151 |
| H | -3.446092 | -2.612910 | -3.941581 |
| C | -4.513747 | -0.724319 | -3.837857 |
| H | -5.390531 | -1.094118 | -4.382232 |
| C | -4.472793 | 0.602248  | -3.382871 |
| H | -5.315972 | 1.276686  | -3.574560 |
| C | -3.352502 | 1.076960  | -2.682951 |
| H | -3.337673 | 2.114967  | -2.337791 |
| C | -1.332654 | 2.462936  | -0.898617 |
| C | -2.290515 | 2.515726  | 0.136511  |
| H | -2.669626 | 1.580971  | 0.559617  |
| C | -2.771233 | 3.745166  | 0.602631  |
| H | -3.520602 | 3.769749  | 1.402965  |
| C | 0.068913  | -4.839403 | -0.014450 |
| H | 1.023696  | -5.151290 | -0.477201 |
| H | -0.754771 | -5.253107 | -0.617762 |
| H | 0.039155  | -5.244829 | 1.009545  |
| C | 0.009483  | -3.331679 | 0.008718  |
| C | -0.879717 | 3.666675  | -1.466340 |
| H | -0.139905 | 3.663999  | -2.270765 |
| C | -1.356817 | 4.898550  | -0.993590 |
| H | -0.981991 | 5.828091  | -1.436675 |
| C | -2.300311 | 4.943516  | 0.041411  |
| H | -2.672073 | 5.907507  | 0.407154  |
| H | 9.260646  | -2.003539 | -0.671774 |
| H | -9.259906 | -2.015644 | 0.690881  |
| H | 5.725826  | -2.327797 | -3.155157 |
| H | 5.468534  | -0.459099 | 0.749253  |
| H | -5.722896 | -2.316568 | 3.174112  |
| H | -5.471727 | -0.472879 | -0.742461 |

**Table S5:** Coordinates of  $1_{\text{H}}$  calculated with B97D3/def2-SVP (charge 0, multiplicity 1, SCF: E = -2773.45 h).

| Atom | Coordinates [Å] |           |           |
|------|-----------------|-----------|-----------|
|      | x               | y         | z         |
| Ru   | 0.000007        | 0.332106  | 0.000005  |
| P    | -1.642051       | -0.968692 | -0.974044 |
| C    | 1.058388        | 0.373409  | -1.770999 |

|   |           |           |           |
|---|-----------|-----------|-----------|
| P | 1.642073  | -0.968703 | 0.974032  |
| N | -1.094590 | -0.598472 | 2.762496  |
| N | -1.994835 | 1.297252  | 2.237643  |
| N | 1.094598  | -0.598398 | -2.762514 |
| N | 1.994819  | 1.297329  | -2.237632 |
| C | -1.058379 | 0.373360  | 1.771005  |
| C | 2.366433  | 2.527854  | -1.618316 |
| C | 3.725003  | 2.778533  | -1.370291 |
| C | 3.157923  | 4.966404  | -0.481563 |
| C | 1.396774  | 3.493516  | -1.300706 |
| C | -3.725045 | 2.778414  | 1.370281  |
| C | -3.158010 | 4.966306  | 0.481578  |
| C | -1.396835 | 3.493465  | 1.300749  |
| C | -2.366472 | 2.527773  | 1.618334  |
| C | 2.230151  | -2.472166 | 0.071174  |
| C | -3.291103 | -0.216363 | -1.428897 |
| C | -2.230108 | -2.472185 | -0.071221 |
| C | 3.291113  | -0.216371 | 1.428927  |
| C | 0.330921  | -1.847278 | -2.755992 |
| H | 0.680938  | -2.467863 | -1.916847 |
| H | 0.590632  | -2.381130 | -3.685678 |
| C | -1.176660 | -1.626857 | -2.667500 |
| H | -1.496351 | -0.870334 | -3.405207 |
| H | -1.718594 | -2.562569 | -2.890787 |
| C | -0.330907 | -1.847349 | 2.755945  |
| H | -0.590621 | -2.381226 | 3.685616  |
| H | -0.680917 | -2.467912 | 1.916781  |
| C | 1.176674  | -1.626919 | 2.667467  |
| H | 1.496357  | -0.870415 | 3.405197  |
| H | 1.718611  | -2.562634 | 2.890730  |
| C | 4.387403  | -1.033870 | 1.778203  |
| H | 4.295358  | -2.124782 | 1.716590  |
| C | 5.598052  | -0.463236 | 2.193929  |
| H | 6.443867  | -1.110245 | 2.458183  |
| C | 5.728194  | 0.933909  | 2.271711  |
| H | 6.676387  | 1.380594  | 2.595857  |
| C | 4.641442  | 1.751419  | 1.930957  |
| H | 4.733357  | 2.842994  | 1.978683  |
| C | 3.430765  | 1.179080  | 1.510303  |
| H | 2.573998  | 1.803075  | 1.227695  |
| C | 3.131755  | -2.299737 | -1.004239 |
| H | 3.572677  | -1.312834 | -1.185219 |
| C | 1.676662  | -3.752147 | 0.284531  |
| H | 0.969006  | -3.919453 | 1.102169  |
| C | 3.452897  | -3.368465 | -1.848972 |
| H | 4.150136  | -3.210464 | -2.681173 |
| C | 2.881963  | -4.635466 | -1.638215 |

|   |           |           |           |
|---|-----------|-----------|-----------|
| H | 3.130038  | -5.471978 | -2.302256 |
| C | 1.998465  | -4.822578 | -0.563449 |
| H | 1.553183  | -5.808961 | -0.382483 |
| C | -1.676596 | -3.752153 | -0.284597 |
| H | -0.968931 | -3.919432 | -1.102234 |
| C | -1.998388 | -4.822605 | 0.563360  |
| H | -1.553088 | -5.808978 | 0.382379  |
| C | -2.881900 | -4.635529 | 1.638121  |
| H | -3.129966 | -5.472057 | 2.302144  |
| C | -3.452857 | -3.368542 | 1.848896  |
| H | -4.150108 | -3.210568 | 2.681093  |
| C | -3.131724 | -2.299792 | 1.004188  |
| H | -3.572666 | -1.312900 | 1.185181  |
| C | -4.387393 | -1.033865 | -1.778168 |
| H | -4.295337 | -2.124778 | -1.716578 |
| C | -5.598057 | -0.463234 | -2.193855 |
| H | -6.443871 | -1.110246 | -2.458103 |
| C | -5.728216 | 0.933912  | -2.271597 |
| H | -6.676421 | 1.380594  | -2.595711 |
| C | -4.641466 | 1.751424  | -1.930845 |
| H | -4.733395 | 2.843000  | -1.978542 |
| C | -3.430772 | 1.179088  | -1.510236 |
| H | -2.574005 | 1.803086  | -1.227633 |
| C | -4.120157 | 4.000490  | 0.807378  |
| H | -5.181787 | 4.185963  | 0.607270  |
| C | -1.799596 | 4.707585  | 0.731876  |
| H | -1.045412 | 5.463868  | 0.487493  |
| C | 1.799511  | 4.707644  | -0.731833 |
| H | 1.045310  | 5.463904  | -0.487431 |
| C | 4.120092  | 4.000618  | -0.807391 |
| H | 5.181720  | 4.186121  | -0.607303 |
| C | 2.588058  | 0.886804  | -3.435643 |
| H | 3.325299  | 1.498575  | -3.952278 |
| C | 2.012346  | -0.302326 | -3.765116 |
| H | 2.170082  | -0.958030 | -4.620612 |
| C | -2.012348 | -0.302431 | 3.765098  |
| H | -2.170083 | -0.958155 | 4.620579  |
| C | -2.588073 | 0.886697  | 3.435644  |
| H | -3.325328 | 1.498448  | 3.952284  |
| H | -0.875595 | 1.614720  | -0.462863 |
| H | 0.875597  | 1.614716  | 0.462904  |
| H | 3.463376  | 5.920459  | -0.035839 |
| H | -3.463481 | 5.920355  | 0.035854  |
| H | 0.343379  | 3.270056  | -1.482823 |
| H | 4.464814  | 2.002186  | -1.591349 |
| H | -4.464837 | 2.002042  | 1.591318  |
| H | -0.343437 | 3.270034  | 1.482884  |

**Table S6:** Coordinates of **2** calculated with B97D3/def2-SVP (charge 1, multiplicity 1, SCF: E = -3157.39 h).

| Atom | Coordinates [Å] |           |           |
|------|-----------------|-----------|-----------|
|      | x               | y         | z         |
| Ru   | -0.000904       | -0.559926 | 0.002713  |
| N    | -2.255452       | -0.380114 | 2.204970  |
| C    | -1.894400       | -0.690739 | 0.873711  |
| P    | 0.690350        | 0.968711  | 1.482841  |
| P    | -0.698348       | 0.958383  | -1.484893 |
| N    | -4.101202       | -1.069388 | 1.284188  |
| C    | -3.570433       | -0.603581 | 2.429416  |
| H    | -4.115010       | -0.449508 | 3.360295  |
| O    | 0.447574        | -2.529778 | 1.010081  |
| O    | -0.434095       | -2.533924 | -1.001638 |
| C    | -0.582640       | 1.366142  | 2.795225  |
| H    | -0.074000       | 1.815801  | 3.664600  |
| H    | -1.298266       | 2.099064  | 2.388468  |
| C    | 1.893055        | -0.687624 | -0.867661 |
| C    | 3.567708        | -0.607387 | -2.425105 |
| H    | 4.111334        | -0.458469 | -3.357395 |
| C    | -3.092643       | -1.136151 | 0.322940  |
| H    | -3.317150       | -1.484013 | -0.682434 |
| N    | 2.252373        | -0.385330 | -2.201197 |
| C    | -1.327957       | 0.103584  | 3.233478  |
| H    | -0.620501       | -0.710460 | 3.470332  |
| H    | -1.917463       | 0.304574  | 4.143746  |
| N    | 4.100287        | -1.064149 | -1.277019 |
| C    | 3.092636        | -1.126469 | -0.314544 |
| H    | 3.318787        | -1.466074 | 0.693311  |
| C    | 1.322425        | 0.089623  | -3.231648 |
| H    | 0.617359        | -0.728078 | -3.463008 |
| H    | 1.910482        | 0.287309  | -4.143575 |
| C    | 0.573520        | 1.352281  | -2.799649 |
| H    | 0.063448        | 1.795912  | -3.671273 |
| H    | 1.287079        | 2.089399  | -2.396884 |
| C    | -5.481951       | -1.422525 | 1.072963  |
| C    | -5.930918       | -2.681731 | 1.524665  |
| C    | -7.276493       | -3.012009 | 1.278716  |
| H    | -7.657683       | -3.982870 | 1.615686  |
| C    | -8.122400       | -2.121867 | 0.604884  |
| C    | -7.641432       | -0.883399 | 0.159638  |
| H    | -8.309088       | -0.193605 | -0.369408 |
| C    | -6.304714       | -0.506232 | 0.381907  |
| C    | -5.765254       | 0.818083  | -0.100339 |
| H    | -6.573882       | 1.451742  | -0.497790 |

|   |           |           |           |
|---|-----------|-----------|-----------|
| H | -5.015255 | 0.684529  | -0.900544 |
| H | -5.265898 | 1.371799  | 0.715157  |
| C | 5.481364  | -1.414465 | -1.063970 |
| C | -5.000868 | -3.632975 | 2.238591  |
| H | -5.440458 | -4.641317 | 2.299172  |
| H | -4.794794 | -3.298471 | 3.272919  |
| H | -4.025818 | -3.708075 | 1.724662  |
| C | 6.304727  | -0.490804 | -0.383647 |
| C | 7.641781  | -0.865468 | -0.159095 |
| H | 8.310084  | -0.170049 | 0.361697  |
| C | 8.122191  | -2.108734 | -0.591412 |
| C | 7.275368  | -3.006503 | -1.253962 |
| H | 7.656110  | -3.981143 | -1.580361 |
| C | 5.929537  | -2.678823 | -1.501783 |
| C | 5.764931  | 0.837805  | 0.086307  |
| H | 6.573671  | 1.476248  | 0.475789  |
| H | 5.016778  | 0.711071  | 0.889440  |
| H | 5.263133  | 1.382860  | -0.733513 |
| C | 4.997846  | -3.638071 | -2.202854 |
| H | 5.437938  | -4.646680 | -2.254703 |
| H | 4.787358  | -3.314272 | -3.239674 |
| H | 4.024638  | -3.708389 | -1.684516 |
| C | 2.312783  | 2.658925  | -0.026199 |
| H | 2.708589  | 1.713737  | -0.408260 |
| C | 2.835225  | 3.877591  | -0.474889 |
| H | 3.638874  | 3.885470  | -1.221219 |
| C | 2.335995  | 5.087474  | 0.035638  |
| H | 2.741038  | 6.043339  | -0.315866 |
| C | 1.320942  | 5.064744  | 1.001662  |
| H | 0.923262  | 6.003654  | 1.403168  |
| C | 0.801043  | 3.843380  | 1.456602  |
| H | 0.003939  | 3.856190  | 2.204392  |
| C | 1.285248  | 2.629160  | 0.939979  |
| C | 3.107120  | 1.335548  | 2.978983  |
| H | 3.067170  | 2.383211  | 2.665187  |
| C | 4.162826  | 0.902158  | 3.795247  |
| H | 4.933478  | 1.616769  | 4.107861  |
| C | 4.234927  | -0.436852 | 4.207584  |
| H | 5.062751  | -0.774214 | 4.842057  |
| C | 3.240479  | -1.340282 | 3.802942  |
| H | 3.288601  | -2.389318 | 4.118475  |
| C | 2.185715  | -0.914520 | 2.981348  |
| H | 1.447407  | -1.640474 | 2.631215  |
| C | 2.112054  | 0.429186  | 2.557453  |
| C | -2.118224 | 0.409861  | -2.557394 |
| C | -2.190245 | -0.936765 | -2.972144 |
| H | -1.452118 | -1.659795 | -2.615580 |

|   |           |           |           |
|---|-----------|-----------|-----------|
| C | -3.242929 | -1.368606 | -3.793252 |
| H | -3.289966 | -2.419837 | -4.101569 |
| C | -4.236673 | -0.468394 | -4.206656 |
| H | -5.062824 | -0.810486 | -4.840773 |
| C | -4.166081 | 0.873481  | -3.803479 |
| H | -4.936280 | 1.585579  | -4.122860 |
| C | -3.112619 | 1.312902  | -2.987567 |
| H | -3.073988 | 2.362701  | -2.680787 |
| C | -1.297641 | 2.619929  | -0.950725 |
| C | -2.324931 | 2.651351  | 0.015618  |
| H | -2.717356 | 1.706784  | 0.402662  |
| C | -2.851021 | 3.870646  | 0.458279  |
| H | -3.654433 | 3.879843  | 1.204843  |
| C | 0.095161  | -4.684675 | -0.029104 |
| H | 1.076635  | -4.985024 | -0.441340 |
| H | -0.690192 | -5.102674 | -0.678895 |
| H | 0.014769  | -5.097066 | 0.989452  |
| C | 0.020844  | -3.176801 | -0.000618 |
| C | -0.817218 | 3.832950  | -1.473639 |
| H | -0.020346 | 3.844359  | -2.221710 |
| C | -1.340800 | 5.054981  | -1.024759 |
| H | -0.946161 | 5.993087  | -1.431116 |
| C | -2.355693 | 5.079442  | -0.058592 |
| H | -2.763611 | 6.035825  | 0.288149  |
| H | 9.167066  | -2.382570 | -0.405970 |
| H | -9.167014 | -2.397793 | 0.421041  |

**Table S7:** Coordinates of **2<sub>H</sub>** calculated with B97D3/def2-SVP (charge 0, multiplicity 1, SCF: E = -2930.53 h).

| Atom | Coordinates [Å] |           |           |
|------|-----------------|-----------|-----------|
|      | x               | y         | z         |
| Ru   | -0.000010       | 0.105012  | 0.000012  |
| P    | -1.660084       | -1.220858 | -0.926453 |
| C    | 0.920366        | 0.239780  | -1.838123 |
| P    | 1.659874        | -1.221082 | 0.926465  |
| N    | -0.925951       | -0.684982 | 2.872368  |
| N    | -1.670519       | 1.282861  | 2.374088  |
| N    | 0.925916        | -0.685175 | -2.872291 |
| N    | 1.670827        | 1.282538  | -2.374016 |
| C    | -0.920305       | 0.239937  | 1.838167  |
| C    | 2.069286        | 2.480760  | -1.689727 |
| C    | 3.386257        | 2.545689  | -1.182187 |
| C    | 2.904507        | 4.805845  | -0.400132 |
| C    | 1.175758        | 3.571333  | -1.609738 |
| C    | -3.385839       | 2.546122  | 1.182202  |
| C    | -2.903859       | 4.806185  | 0.400032  |

|   |           |           |           |
|---|-----------|-----------|-----------|
| C | -1.175227 | 3.571559  | 1.609674  |
| C | -2.068865 | 2.481084  | 1.689733  |
| C | 2.216430  | -2.731176 | 0.012586  |
| C | -3.306920 | -0.471736 | -1.402410 |
| C | -2.216858 | -2.730861 | -0.012583 |
| C | 3.306807  | -0.472176 | 1.402408  |
| C | 4.337224  | 1.388995  | -1.351482 |
| H | 4.709340  | 1.322337  | -2.391211 |
| H | 5.203657  | 1.483582  | -0.678927 |
| H | 3.834597  | 0.436928  | -1.124352 |
| C | -0.214141 | 3.479380  | -2.171202 |
| H | -0.227370 | 2.979756  | -3.155441 |
| H | -0.824472 | 2.858383  | -1.488884 |
| H | -0.680447 | 4.473426  | -2.260274 |
| C | 0.272893  | -1.993460 | -2.822856 |
| H | 0.720773  | -2.576870 | -2.005082 |
| H | 0.516442  | -2.510392 | -3.766755 |
| C | -1.237006 | -1.884601 | -2.638022 |
| H | -1.657202 | -1.173436 | -3.369965 |
| H | -1.725016 | -2.860226 | -2.807006 |
| C | -4.336870 | 1.389476  | 1.351463  |
| H | -4.708789 | 1.322627  | 2.391249  |
| H | -5.203414 | 1.484255  | 0.679075  |
| H | -3.834347 | 0.437421  | 1.124048  |
| C | 0.214713  | 3.479434  | 2.171005  |
| H | 0.227985  | 2.979805  | 3.155243  |
| H | 0.824878  | 2.858365  | 1.488598  |
| H | 0.681164  | 4.473415  | 2.260026  |
| C | -0.273160 | -1.993381 | 2.822935  |
| H | -0.516759 | -2.510246 | 3.766858  |
| H | -0.721179 | -2.576747 | 2.005203  |
| C | 1.236746  | -1.884785 | 2.638038  |
| H | 1.657108  | -1.173736 | 3.369999  |
| H | 1.724581  | -2.860510 | 2.806939  |
| C | 4.478212  | -1.243341 | 1.540957  |
| H | 4.463032  | -2.310032 | 1.290718  |
| C | 5.669436  | -0.654170 | 1.990981  |
| H | 6.577309  | -1.263572 | 2.081611  |
| C | 5.699625  | 0.707922  | 2.331107  |
| H | 6.630963  | 1.166612  | 2.685447  |
| C | 4.531571  | 1.476629  | 2.213561  |
| H | 4.543109  | 2.543105  | 2.468629  |
| C | 3.347470  | 0.891339  | 1.744596  |
| H | 2.440426  | 1.488104  | 1.605348  |
| C | 3.084214  | -2.582081 | -1.094359 |
| H | 3.525755  | -1.602919 | -1.305502 |
| C | 1.654322  | -4.002540 | 0.252953  |

|   |           |           |           |
|---|-----------|-----------|-----------|
| H | 0.968641  | -4.153535 | 1.092037  |
| C | 3.371515  | -3.663521 | -1.935048 |
| H | 4.046988  | -3.522165 | -2.787837 |
| C | 2.791502  | -4.921079 | -1.695091 |
| H | 3.009966  | -5.767337 | -2.357088 |
| C | 1.935547  | -5.084444 | -0.594904 |
| H | 1.480827  | -6.062236 | -0.392267 |
| C | -1.655011 | -4.002332 | -0.252975 |
| H | -0.969360 | -4.153450 | -1.092061 |
| C | -1.936449 | -5.084187 | 0.594873  |
| H | -1.481931 | -6.062070 | 0.392222  |
| C | -2.792360 | -4.920664 | 1.695071  |
| H | -3.010987 | -5.766888 | 2.357058  |
| C | -3.372101 | -3.662987 | 1.935066  |
| H | -4.047528 | -3.521506 | 2.787871  |
| C | -3.084579 | -2.581594 | 1.094393  |
| H | -3.525885 | -1.602332 | 1.305568  |
| C | -4.478425 | -1.242743 | -1.540976 |
| H | -4.463389 | -2.309438 | -1.290751 |
| C | -5.669578 | -0.653405 | -1.990972 |
| H | -6.577533 | -1.262685 | -2.081601 |
| C | -5.699586 | 0.708691  | -2.331086 |
| H | -6.630862 | 1.167511  | -2.685423 |
| C | -4.531422 | 1.477232  | -2.213561 |
| H | -4.542817 | 2.543707  | -2.468633 |
| C | -3.347397 | 0.891783  | -1.744605 |
| H | -2.440274 | 1.488425  | -1.605364 |
| C | -3.783110 | 3.723251  | 0.523358  |
| H | -4.794328 | 3.781805  | 0.104084  |
| C | -1.617683 | 4.731979  | 0.948511  |
| H | -0.935974 | 5.586446  | 0.868345  |
| C | 1.618331  | 4.731741  | -0.948629 |
| H | 0.936739  | 5.586314  | -0.868582 |
| C | 3.783645  | 3.722814  | -0.523400 |
| H | 4.794865  | 3.781278  | -0.104113 |
| C | 2.106153  | 1.005290  | -3.670608 |
| H | 2.703050  | 1.715930  | -4.239868 |
| C | 1.630505  | -0.233438 | -3.984532 |
| H | 1.728190  | -0.827921 | -4.892435 |
| C | -1.630354 | -0.233067 | 3.984653  |
| H | -1.728103 | -0.827514 | 4.892573  |
| C | -2.105778 | 1.005748  | 3.670728  |
| H | -2.702523 | 1.716509  | 4.239996  |
| H | -0.931896 | 1.377771  | -0.350561 |
| H | 0.932025  | 1.377681  | 0.350583  |
| H | 3.227149  | 5.717199  | 0.117939  |
| H | -3.226404 | 5.717537  | -0.118102 |



**Table S8:** Coordinates of **3** calculated with B97D3/def2-SVP (charge 1, multiplicity 1, SCF: E = -3471.49 h).

| Atom | Coordinates [Å] |           |           |
|------|-----------------|-----------|-----------|
|      | x               | y         | z         |
| Ru   | -0.004724       | -0.328988 | 0.001704  |
| N    | -2.359922       | -0.150375 | 2.092524  |
| C    | -1.930547       | -0.454647 | 0.781195  |
| P    | 0.620373        | 1.197189  | 1.511987  |
| P    | -0.620507       | 1.190124  | -1.519298 |
| N    | -4.139781       | -0.894270 | 1.088863  |
| C    | -3.677806       | -0.410492 | 2.255952  |
| H    | -4.266716       | -0.286275 | 3.163747  |
| O    | 0.370217        | -2.303920 | 1.039696  |
| O    | -0.420359       | -2.308776 | -1.010054 |
| C    | -0.720823       | 1.605397  | 2.752492  |
| H    | -0.257872       | 2.060985  | 3.644051  |
| H    | -1.413009       | 2.335998  | 2.303227  |
| C    | 1.922650        | -0.480023 | -0.777886 |
| C    | 3.675073        | -0.423538 | -2.247201 |
| H    | 4.266484        | -0.293211 | -3.152529 |
| C    | -3.088500       | -0.931641 | 0.175545  |
| H    | -3.258533       | -1.276722 | -0.841110 |
| N    | 2.355356        | -0.171256 | -2.087692 |
| C    | -1.489917       | 0.348016  | 3.163652  |
| H    | -0.795627       | -0.461948 | 3.449355  |
| H    | -2.128475       | 0.560376  | 4.037538  |
| N    | 4.136182        | -0.908244 | -1.080325 |
| C    | 3.081220        | -0.955653 | -0.170897 |
| H    | 3.250332        | -1.302413 | 0.845474  |
| C    | 1.488062        | 0.323976  | -3.162611 |
| H    | 0.791860        | -0.485686 | -3.444156 |
| H    | 2.128471        | 0.528387  | -4.037049 |
| C    | 0.721970        | 1.586531  | -2.761779 |
| H    | 0.260786        | 2.036311  | -3.657219 |
| H    | 1.415451        | 2.319083  | -2.317820 |
| C    | -5.490360       | -1.324223 | 0.824477  |
| C    | -5.841793       | -2.655445 | 1.146276  |
| C    | -7.160628       | -3.052779 | 0.859908  |
| H    | -7.478813       | -4.074130 | 1.091340  |
| C    | -8.070341       | -2.162664 | 0.276329  |
| C    | -7.681166       | -0.857524 | -0.049507 |
| H    | -8.403270       | -0.179529 | -0.515181 |
| C    | -6.373666       | -0.408314 | 0.208574  |
| C    | 5.492299        | -1.320096 | -0.813656 |
| C    | 6.361262        | -0.393764 | -0.192092 |

|   |           |           |           |
|---|-----------|-----------|-----------|
| C | 7.675242  | -0.823786 | 0.065172  |
| H | 8.385895  | -0.136785 | 0.535186  |
| C | 8.086084  | -2.120613 | -0.267389 |
| C | 7.191400  | -3.021049 | -0.857536 |
| H | 7.525457  | -4.036204 | -1.094471 |
| C | 5.866751  | -2.642707 | -1.143416 |
| C | 2.317880  | 2.878678  | 0.075186  |
| H | 2.722350  | 1.931746  | -0.293715 |
| C | 2.860419  | 4.094939  | -0.356498 |
| H | 3.688897  | 4.097464  | -1.074217 |
| C | 2.345058  | 5.307505  | 0.131023  |
| H | 2.766149  | 6.261241  | -0.207170 |
| C | 1.291585  | 5.290171  | 1.055002  |
| H | 0.880536  | 6.231173  | 1.437731  |
| C | 0.748683  | 4.071412  | 1.489627  |
| H | -0.080223 | 4.088688  | 2.201859  |
| C | 1.250251  | 2.854109  | 0.996867  |
| C | 2.931052  | 1.566511  | 3.162685  |
| H | 2.908730  | 2.614681  | 2.848440  |
| C | 3.921106  | 1.138816  | 4.059539  |
| H | 4.658994  | 1.857946  | 4.433613  |
| C | 3.971645  | -0.201085 | 4.471973  |
| H | 4.749109  | -0.533730 | 5.169571  |
| C | 3.021387  | -1.111612 | 3.985448  |
| H | 3.054084  | -2.161719 | 4.299594  |
| C | 2.028497  | -0.690386 | 3.087891  |
| H | 1.320602  | -1.418875 | 2.684076  |
| C | 1.976347  | 0.655102  | 2.666095  |
| C | -1.979418 | 0.644000  | -2.668438 |
| C | -2.028355 | -0.701469 | -3.090858 |
| H | -1.315430 | -1.427399 | -2.691715 |
| C | -3.026518 | -1.127521 | -3.980154 |
| H | -3.056528 | -2.177733 | -4.294170 |
| C | -3.985886 | -0.221867 | -4.457810 |
| H | -4.767820 | -0.558350 | -5.148533 |
| C | -3.938628 | 1.118069  | -4.045175 |
| H | -4.683308 | 1.833654  | -4.412546 |
| C | -2.942936 | 1.550601  | -3.156864 |
| H | -2.923479 | 2.598789  | -2.842805 |
| C | -1.247322 | 2.851051  | -1.013712 |
| C | -2.317676 | 2.882657  | -0.095225 |
| H | -2.724583 | 1.938461  | 0.277956  |
| C | -2.861008 | 4.102072  | 0.326289  |
| H | -3.692805 | 4.109725  | 1.040280  |
| C | -0.008456 | -4.460720 | 0.015715  |
| H | 0.998748  | -4.801766 | -0.286450 |
| H | -0.741062 | -4.861201 | -0.702429 |

|   |           |           |           |
|---|-----------|-----------|-----------|
| H | -0.207326 | -4.851356 | 1.026804  |
| C | -0.030494 | -2.950747 | 0.018254  |
| C | -0.743315 | 4.064559  | -1.513081 |
| H | 0.087200  | 4.076385  | -2.223570 |
| C | -1.286244 | 5.286619  | -1.087712 |
| H | -0.873187 | 6.224745  | -1.475318 |
| C | -2.342804 | 5.310982  | -0.167388 |
| H | -2.764346 | 6.267326  | 0.162795  |
| H | 9.114526  | -2.435815 | -0.056518 |
| H | -9.093953 | -2.493073 | 0.065161  |
| C | 4.862693  | -3.641888 | -1.709764 |
| H | 4.030237  | -3.069344 | -2.156315 |
| C | 5.903516  | 1.021184  | 0.147833  |
| H | 4.806285  | 0.993583  | 0.265687  |
| C | -4.816942 | -3.638238 | 1.705197  |
| H | -4.020070 | -3.051126 | 2.196148  |
| C | -5.935096 | 1.013817  | -0.127111 |
| H | -4.837703 | 1.000161  | -0.246391 |
| C | 4.264869  | -4.492831 | -0.569296 |
| H | 5.053925  | -5.077160 | -0.062347 |
| H | 3.768875  | -3.860497 | 0.187084  |
| H | 3.517799  | -5.202918 | -0.968176 |
| C | 5.453133  | -4.526406 | -2.820074 |
| H | 5.918860  | -3.919482 | -3.616467 |
| H | 6.219338  | -5.220115 | -2.430701 |
| H | 4.659086  | -5.143552 | -3.276315 |
| C | 6.226302  | 1.986091  | -1.011052 |
| H | 5.738813  | 1.670704  | -1.950539 |
| H | 5.884037  | 3.008648  | -0.771098 |
| H | 7.315107  | 2.026075  | -1.195001 |
| C | 6.477505  | 1.538381  | 1.475889  |
| H | 6.296647  | 0.822211  | 2.295000  |
| H | 7.563998  | 1.727221  | 1.411891  |
| H | 5.993360  | 2.493287  | 1.746002  |
| C | -5.401658 | -4.585140 | 2.765499  |
| H | -5.917671 | -4.027683 | 3.567031  |
| H | -6.123686 | -5.297606 | 2.328396  |
| H | -4.595265 | -5.183263 | 3.225248  |
| C | -4.153492 | -4.425445 | 0.554454  |
| H | -4.904407 | -5.026495 | 0.010313  |
| H | -3.665406 | -3.750185 | -0.168664 |
| H | -3.384187 | -5.112908 | 0.950186  |
| C | -6.267179 | 1.971585  | 1.035014  |
| H | -5.778264 | 1.656357  | 1.973793  |
| H | -5.932626 | 2.997968  | 0.799786  |
| H | -7.356476 | 2.002173  | 1.217970  |
| C | -6.516924 | 1.527258  | -1.453232 |

|   |           |          |           |
|---|-----------|----------|-----------|
| H | -6.326538 | 0.816107 | -2.274641 |
| H | -7.605970 | 1.700436 | -1.388240 |
| H | -6.046513 | 2.489851 | -1.720601 |

**Table S9:** Coordinates of  $\mathbf{3}_H$  calculated with B97D3/def2-SVP (charge 0, multiplicity 1, SCF: E = -3244.62 h).

| Atom | Coordinates [Å] |           |           |
|------|-----------------|-----------|-----------|
|      | x               | y         | z         |
| Ru   | -0.000359       | 0.303273  | -0.000055 |
| P    | 1.646940        | 1.672250  | -0.933500 |
| C    | -0.873677       | 0.162725  | -1.868649 |
| P    | -1.648459       | 1.671547  | 0.932860  |
| N    | 0.867827        | 1.127488  | 2.870768  |
| N    | 1.457100        | -0.920907 | 2.517303  |
| N    | -0.867887       | 1.124954  | -2.871848 |
| N    | -1.455699       | -0.923676 | -2.517353 |
| C    | 0.873588        | 0.164515  | 1.868283  |
| C    | -1.793209       | -2.218871 | -1.986329 |
| C    | -3.083198       | -2.419061 | -1.430786 |
| C    | -2.574130       | -4.808861 | -1.305544 |
| C    | -0.884709       | -3.282249 | -2.178642 |
| C    | 3.084721        | -2.416843 | 1.431744  |
| C    | 2.576362        | -4.806899 | 1.308907  |
| C    | 0.886500        | -3.279892 | 2.180495  |
| C    | 1.794754        | -2.216472 | 1.987234  |
| C    | -2.383681       | 3.034783  | -0.079452 |
| C    | 3.190016        | 0.924586  | -1.684587 |
| C    | 2.382079        | 3.035784  | 0.078485  |
| C    | -3.191451       | 0.923817  | 1.684015  |
| C    | -4.028009       | -1.248542 | -1.167036 |
| H    | -3.390324       | -0.439683 | -0.766675 |
| C    | 0.492636        | -3.060810 | -2.785667 |
| H    | 0.631181        | -1.972391 | -2.879677 |
| C    | -0.374401       | 2.491880  | -2.716648 |
| H    | -0.877324       | 2.942715  | -1.854034 |
| H    | -0.687087       | 3.054300  | -3.612716 |
| C    | 1.134612        | 2.549014  | -2.533002 |
| H    | 1.640212        | 2.037682  | -3.369078 |
| H    | 1.485999        | 3.594553  | -2.530487 |
| C    | 4.029073        | -1.246265 | 1.166646  |
| H    | 3.390930        | -0.437821 | 0.766183  |
| C    | -0.490884       | -3.058215 | 2.787341  |
| H    | -0.629937       | -1.969715 | 2.879680  |
| C    | 0.372645        | 2.493751  | 2.715134  |
| H    | 0.685024        | 3.056945  | 3.610821  |
| H    | 0.874655        | 2.944841  | 1.852106  |

|   |           |           |           |
|---|-----------|-----------|-----------|
| C | -1.136522 | 2.548812  | 2.532172  |
| H | -1.640932 | 2.036524  | 3.368386  |
| H | -1.489547 | 3.593808  | 2.530017  |
| C | -4.399534 | 1.632017  | 1.833461  |
| H | -4.526995 | 2.606346  | 1.348944  |
| C | -5.439707 | 1.105672  | 2.616129  |
| H | -6.379021 | 1.663594  | 2.717085  |
| C | -5.275465 | -0.119313 | 3.280997  |
| H | -6.084083 | -0.521974 | 3.902866  |
| C | -4.072630 | -0.827923 | 3.137285  |
| H | -3.936772 | -1.791296 | 3.643785  |
| C | -3.047390 | -0.316552 | 2.330533  |
| H | -2.116183 | -0.869449 | 2.178259  |
| C | -3.311854 | 2.694939  | -1.090053 |
| H | -3.685827 | 1.668866  | -1.154599 |
| C | -1.900914 | 4.359747  | -0.030881 |
| H | -1.161778 | 4.648745  | 0.724233  |
| C | -3.737203 | 3.647061  | -2.024042 |
| H | -4.454603 | 3.358543  | -2.802207 |
| C | -3.242019 | 4.960959  | -1.972239 |
| H | -3.570221 | 5.705713  | -2.706886 |
| C | -2.325007 | 5.312807  | -0.968927 |
| H | -1.934779 | 6.336916  | -0.916339 |
| C | 1.899459  | 4.360787  | 0.029640  |
| H | 1.160350  | 4.649713  | -0.725529 |
| C | 2.323643  | 5.314003  | 0.967491  |
| H | 1.933535  | 6.338144  | 0.914670  |
| C | 3.240574  | 4.962259  | 1.970908  |
| H | 3.568839  | 5.707128  | 2.705412  |
| C | 3.735600  | 3.648313  | 2.023000  |
| H | 4.452928  | 3.359851  | 2.801252  |
| C | 3.310190  | 2.696058  | 1.089182  |
| H | 3.684089  | 1.669980  | 1.153933  |
| C | 4.398075  | 1.632842  | -1.833929 |
| H | 4.525464  | 2.607157  | -1.349361 |
| C | 5.438312  | 1.106573  | -2.616568 |
| H | 6.377609  | 1.664538  | -2.717450 |
| C | 5.274172  | -0.118406 | -3.281474 |
| H | 6.082844  | -0.521005 | -3.903311 |
| C | 4.071376  | -0.827097 | -3.137818 |
| H | 3.935586  | -1.790470 | -3.644338 |
| C | 3.046062  | -0.315787 | -2.331127 |
| H | 2.114869  | -0.868733 | -2.178923 |
| C | 3.454178  | -3.734533 | 1.108043  |
| H | 4.441299  | -3.928181 | 0.679443  |
| C | 1.298870  | -4.577586 | 1.823389  |
| H | 0.608258  | -5.417092 | 1.960706  |

|   |           |           |           |
|---|-----------|-----------|-----------|
| C | -1.296724 | -4.579718 | -1.820298 |
| H | -0.605885 | -5.419168 | -1.956827 |
| C | -3.452263 | -3.736539 | -1.105784 |
| H | -4.439354 | -3.930067 | -0.677060 |
| C | -1.720397 | -0.652762 | -3.862051 |
| H | -2.163433 | -1.399883 | -4.517401 |
| C | -1.348942 | 0.639024  | -4.082183 |
| H | -1.399902 | 1.255552  | -4.978916 |
| C | 1.350438  | 0.642914  | 4.081027  |
| H | 1.401717  | 1.260192  | 4.977225  |
| C | 1.722798  | -0.648720 | 3.861553  |
| H | 2.167020  | -1.394969 | 4.517091  |
| H | 0.918120  | -0.980643 | -0.365549 |
| H | -0.917747 | -0.981255 | 0.366022  |
| H | -2.885811 | -5.826314 | -1.040017 |
| H | 2.888320  | -5.824534 | 1.044405  |
| C | -5.094659 | -1.560101 | -0.109087 |
| H | -4.657805 | -2.016097 | 0.791582  |
| H | -5.596244 | -0.628564 | 0.202198  |
| H | -5.871357 | -2.241430 | -0.503707 |
| C | -4.722166 | -0.731995 | -2.444769 |
| H | -4.009411 | -0.339034 | -3.185283 |
| H | -5.306112 | -1.541397 | -2.921259 |
| H | -5.425294 | 0.082441  | -2.189066 |
| C | 0.585945  | -3.663046 | -4.199759 |
| H | 0.460006  | -4.761402 | -4.177815 |
| H | -0.191058 | -3.248197 | -4.866371 |
| H | 1.572588  | -3.445130 | -4.649240 |
| C | 1.600563  | -3.586986 | -1.861703 |
| H | 1.527218  | -4.678167 | -1.708730 |
| H | 2.597650  | -3.380957 | -2.288664 |
| H | 1.542501  | -3.096615 | -0.878514 |
| C | -1.598690 | -3.586362 | 1.864354  |
| H | -1.524836 | -4.677743 | 1.713033  |
| H | -2.595810 | -3.380220 | 2.291173  |
| H | -1.541073 | -3.097457 | 0.880410  |
| C | -0.583677 | -3.658362 | 4.202356  |
| H | -0.457164 | -4.756685 | 4.182027  |
| H | 0.193206  | -3.242104 | 4.868224  |
| H | -1.570364 | -3.440265 | 4.651655  |
| C | 5.095058  | -1.558203 | 0.108130  |
| H | 4.657653  | -2.014874 | -0.791935 |
| H | 5.596182  | -0.626731 | -0.204076 |
| H | 5.872219  | -2.239087 | 0.502599  |
| C | 4.723921  | -0.728748 | 2.443603  |
| H | 4.011487  | -0.335623 | 3.184348  |
| H | 5.308447  | -1.537679 | 2.920180  |

H 5.426588 0.085794 2.186975

---

### Calculated Structures

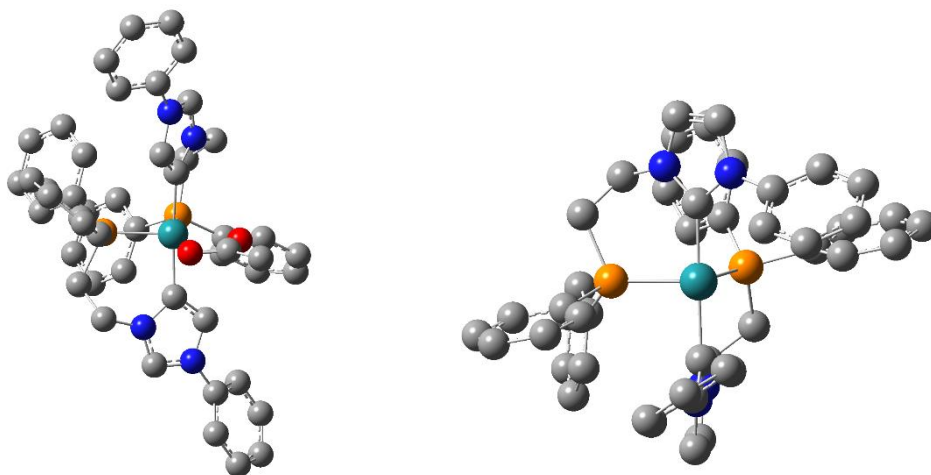

**Figure S49:** Calculated structures for **1** (left) and **1<sub>H</sub>** (right). H atoms removed for clarity.

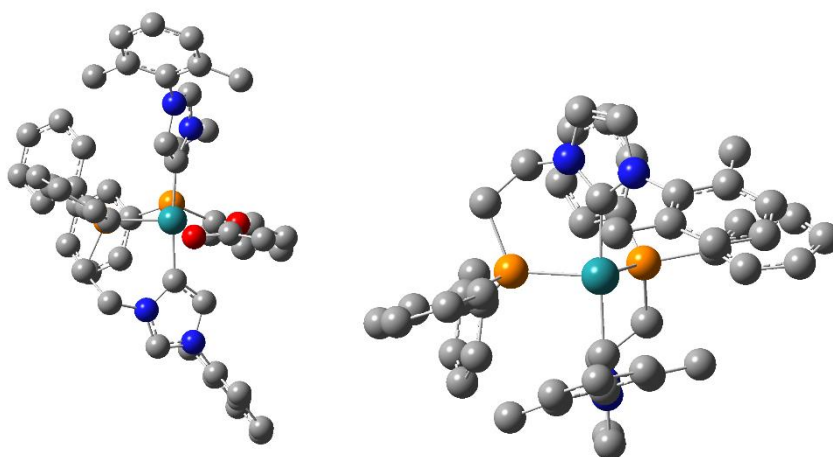

**Figure S50:** Calculated structures for **2** (left) and **2<sub>H</sub>** (right). H atoms removed for clarity.

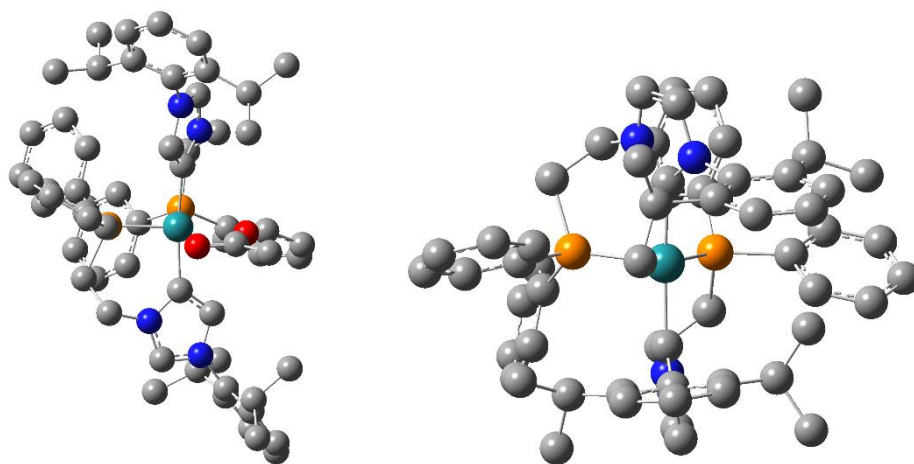

**Figure S51:** Calculated structures for **3** (left) and **3<sub>H</sub>** (right). H atoms removed for clarity.



## DFT - Buried Volume and Steric Map Calculations

### General Remarks

For determination of the buried volumes<sup>27</sup> as well as the steric maps<sup>28</sup> of complexes **1**, **2** and **3**, as well as their respective hydrides **1<sub>H</sub>**, **2<sub>H</sub>** and **3<sub>H</sub>**, the SambVca 2.0 tool<sup>29</sup> is applied. Hereby, the atoms were loaded into the tool as .xyz files. The Ru atom was chosen as coordination point to the center of the sphere (distance 0.00 Å) and the carboxylic acetate carbon or the hydrides selected as z-positive z-axis definition, respectively. One abnormal coordinating aNHC carbene carbon or normal coordinating NHC carbene carbon was selected for xz-plane definition for **1**, **2**, **3** and **1<sub>H</sub>**, **2<sub>H</sub>**, **3<sub>H</sub>**, respectively. The ruthenium central atoms as well as the acetates in compounds **1**, **2** and **3** and the hydrides in compounds **1<sub>H</sub>**, **2<sub>H</sub>** and **3<sub>H</sub>**, were removed. The bond radii were scaled by 1.17 and sphere radii of 3.5 Å, 5 Å and 7 Å chosen. A mesh spacing for numerical integration of 0.10 Å was applied. Hydrogens were neglected from the calculations. The calculated steric maps therefore represent a viewpoint along the z-axis, from positive to negative.

It is to be noted, that whilst calculations using a sphere radius of 3.5 Å and 5 Å are representative of the steric shielding of the coordination site of the complexes, calculations using a sphere radius of 7 Å take into account nearly the whole complex surface (Figure S52) and hence do not represent the active site but the whole complex. Nevertheless, these results were reported for completeness; however, trends describe the buried volume regarding the whole complex rather than that of the active center.

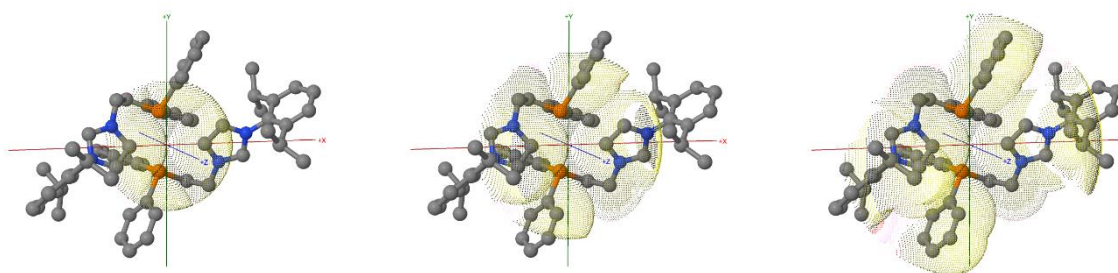

**Figure S52:** Comparison of steric maps with varying sphere radii (3.5 Å left, 5 Å center and 7 Å right) on calculated structures of **3**.

Furthermore, steric map calculations for the hydride complexes **1<sub>H</sub>**, **2<sub>H</sub>** and **3<sub>H</sub>** using sphere radii of 3.5 Å and 5 Å all resulted in an area that did not lie in the defined color range. This is hence depicted by a white color in the center of the steric maps in the SambVca 2.0 tool. Other than the color change, test calculations using the SambVca 2.1 tool did not yield any notable

differences in calculated buried volume (values deviate a maximum of 0.1%) or in the topographic form of the steric maps (Figure **S53**). The validity is also confirmed in the SambVca 2.1 release notes.<sup>30</sup> All herein reported calculations were performed in SambVca 2.0 for comparability.

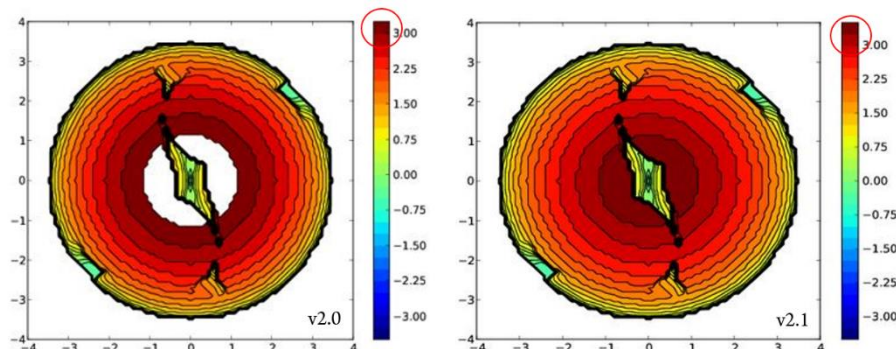

**Figure S53:** Comparison of steric maps of the hydride complex **3H** (left) at a sphere radius of 3.5 Å using the SambVca 2.0 (left) and SambVca 2.1 (right) tool versions. The increase in color increments can be observed in the red circles on the color scale.

It is worth pointing out that the di-hydride complex **2H** formed from **2** via *iso*-propoxide  $\beta$ -H elimination and isomerization of the abnormal to normal carbene ligand occurs through a deactivation pathway.<sup>3a</sup> Calculations performed on **1H**, **2H** and **3H** show a significantly higher buried volume compared to their active abnormal carbene catalyst counterparts whilst their steric maps indicate a shielding of the active center.

## Buried Volume Tables

Table S10: Calculated buried volume for complex 1.

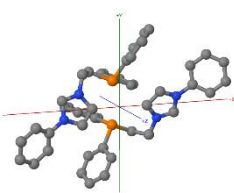




| Radius [Å] | Buried Volume   |                 |                 |                |             |             |
|------------|-----------------|-----------------|-----------------|----------------|-------------|-------------|
| <b>3.5</b> | <b>V Free</b>   | <b>V Buried</b> | <b>V Total</b>  | <b>V Exact</b> |             |             |
|            | 36.5            | 143             | 179.5           | 179.6          |             |             |
|            | <b>%V_Free</b>  | <b>%V_Bur</b>   | <b>% Tot/Ex</b> |                |             |             |
|            | 20.3            | <b>79.7</b>     | 100             |                |             |             |
|            | <b>Quadrant</b> | <b>V_f</b>      | <b>V_b</b>      | <b>V_t</b>     | <b>%V_f</b> | <b>%V_b</b> |
|            | SW              | 7.8             | 37.1            | 44.9           | 17.3        | <b>82.7</b> |
|            | NW              | 10.5            | 34.3            | 44.9           | 23.5        | <b>76.5</b> |
|            | NE              | 7.7             | 37.2            | 44.8           | 17.1        | <b>82.9</b> |
| SE         | 10.5            | 34.4            | 44.9            | 23.3           | <b>76.7</b> |             |
| <b>5</b>   | <b>V Free</b>   | <b>V Buried</b> | <b>V Total</b>  | <b>V Exact</b> |             |             |
|            | 160.2           | 363.1           | 523.3           | 523.6          |             |             |
|            | <b>%V_Free</b>  | <b>%V_Bur</b>   | <b>% Tot/Ex</b> |                |             |             |
|            | 30.6            | <b>69.4</b>     | 99.9            |                |             |             |
|            | <b>Quadrant</b> | <b>V_f</b>      | <b>V_b</b>      | <b>V_t</b>     | <b>%V_f</b> | <b>%V_b</b> |
|            | SW              | 34.5            | 96.3            | 130.8          | 26.4        | <b>73.6</b> |
|            | NW              | 45.8            | 85              | 130.8          | 35          | <b>65</b>   |
|            | NE              | 34.3            | 96.5            | 130.8          | 26.2        | <b>73.8</b> |
| SE         | 45.5            | 85.2            | 130.8           | 34.8           | <b>65.2</b> |             |
| <b>7</b>   | <b>V Free</b>   | <b>V Buried</b> | <b>V Total</b>  | <b>V Exact</b> |             |             |
|            | 795.2           | 641.1           | 1436.3          | 1436.8         |             |             |
|            | <b>%V_Free</b>  | <b>%V_Bur</b>   | <b>% Tot/Ex</b> |                |             |             |
|            | 55.4            | <b>44.6</b>     | 100             |                |             |             |
|            | <b>Quadrant</b> | <b>V_f</b>      | <b>V_b</b>      | <b>V_t</b>     | <b>%V_f</b> | <b>%V_b</b> |
|            | SW              | 155.6           | 203.5           | 359.1          | 43.3        | <b>56.7</b> |
|            | NW              | 242.6           | 116.4           | 359            | 67.6        | <b>32.4</b> |
|            | NE              | 155             | 204             | 359            | 43.2        | <b>56.8</b> |
| SE         | 242             | 117.1           | 359             | 67.4           | <b>32.6</b> |             |

**Table S11:** Calculated buried volume for complex 1<sub>H</sub>.

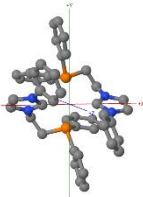




| Radius [Å] | Buried Volume   |                 |                 |                |             |             |
|------------|-----------------|-----------------|-----------------|----------------|-------------|-------------|
| <b>3.5</b> | <b>V Free</b>   | <b>V Buried</b> | <b>V Total</b>  | <b>V Exact</b> |             |             |
|            | 22.7            | 156.8           | 179.5           | 179.6          |             |             |
|            | <b>%V_Free</b>  | <b>%V_Bur</b>   | <b>% Tot/Ex</b> |                |             |             |
|            | 12.6            | <b>87.4</b>     | 100             |                |             |             |
|            | <b>Quadrant</b> | <b>V_f</b>      | <b>V_b</b>      | <b>V_t</b>     | <b>%V_f</b> | <b>%V_b</b> |
|            | SW              | 8.4             | 36.5            | 44.9           | 18.6        | <b>81.4</b> |
|            | NW              | 3               | 41.9            | 44.9           | 6.6         | <b>93.4</b> |
|            | NE              | 8.4             | 36.5            | 44.8           | 18.6        | <b>81.4</b> |
| SE         | 3               | 41.9            | 44.9            | 6.6            | <b>93.4</b> |             |
| <b>5</b>   | <b>V Free</b>   | <b>V Buried</b> | <b>V Total</b>  | <b>V Exact</b> |             |             |
|            | 97.9            | 425.4           | 523.3           | 523.6          |             |             |
|            | <b>%V_Free</b>  | <b>%V_Bur</b>   | <b>% Tot/Ex</b> |                |             |             |
|            | 18.7            | <b>81.3</b>     | 99.9            |                |             |             |
|            | <b>Quadrant</b> | <b>V_f</b>      | <b>V_b</b>      | <b>V_t</b>     | <b>%V_f</b> | <b>%V_b</b> |
|            | SW              | 39.5            | 91.3            | 130.8          | 30.2        | <b>69.8</b> |
|            | NW              | 9.5             | 121.3           | 130.8          | 7.2         | <b>92.8</b> |
|            | NE              | 39.4            | 91.3            | 130.8          | 30.2        | <b>69.8</b> |
| SE         | 9.5             | 121.3           | 130.8           | 7.2            | <b>92.8</b> |             |
| <b>7</b>   | <b>V Free</b>   | <b>V Buried</b> | <b>V Total</b>  | <b>V Exact</b> |             |             |
|            | 691.8           | 744.5           | 1436.3          | 1436.8         |             |             |
|            | <b>%V_Free</b>  | <b>%V_Bur</b>   | <b>% Tot/Ex</b> |                |             |             |
|            | 48.2            | <b>51.8</b>     | 100             |                |             |             |
|            | <b>Quadrant</b> | <b>V_f</b>      | <b>V_b</b>      | <b>V_t</b>     | <b>%V_f</b> | <b>%V_b</b> |
|            | SW              | 238.6           | 120.4           | 359.1          | 66.5        | <b>33.5</b> |
|            | NW              | 107.2           | 251.8           | 359            | 29.9        | <b>70.1</b> |
|            | NE              | 238.6           | 120.4           | 359            | 66.5        | <b>33.5</b> |
| SE         | 107.2           | 251.8           | 359             | 29.9           | <b>70.1</b> |             |

**Table S12:** Calculated buried volume for complex 2.

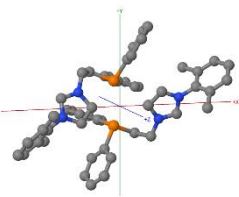




| Radius [Å] | Buried Volume   |                 |                 |                |             |             |
|------------|-----------------|-----------------|-----------------|----------------|-------------|-------------|
| <b>3.5</b> | <b>V Free</b>   | <b>V Buried</b> | <b>V Total</b>  | <b>V Exact</b> |             |             |
|            | 36              | 143.5           | 179.5           | 179.6          |             |             |
|            | <b>%V_Free</b>  | <b>%V_Bur</b>   | <b>% Tot/Ex</b> |                |             |             |
|            | 20.1            | <b>79.9</b>     | 100             |                |             |             |
|            | <b>Quadrant</b> | <b>V_f</b>      | <b>V_b</b>      | <b>V_t</b>     | <b>%V_f</b> | <b>%V_b</b> |
|            | SW              | 7.7             | 37.2            | 44.9           | 17.1        | <b>82.9</b> |
|            | NW              | 10.5            | 34.3            | 44.9           | 23.5        | <b>76.5</b> |
| NE         | 7.5             | 37.4            | 44.8            | 16.7           | <b>83.3</b> |             |
| SE         | 10.3            | 34.5            | 44.9            | 23             | <b>77</b>   |             |
| <b>5</b>   | <b>V Free</b>   | <b>V Buried</b> | <b>V Total</b>  | <b>V Exact</b> |             |             |
|            | 154.1           | 369.2           | 523.3           | 523.6          |             |             |
|            | <b>%V_Free</b>  | <b>%V_Bur</b>   | <b>% Tot/Ex</b> |                |             |             |
|            | 29.5            | <b>70.5</b>     | 99.9            |                |             |             |
|            | <b>Quadrant</b> | <b>V_f</b>      | <b>V_b</b>      | <b>V_t</b>     | <b>%V_f</b> | <b>%V_b</b> |
|            | SW              | 32.5            | 98.3            | 130.8          | 24.9        | <b>75.1</b> |
|            | NW              | 45.1            | 85.7            | 130.8          | 34.5        | <b>65.5</b> |
| NE         | 32              | 98.8            | 130.8           | 24.5           | <b>75.5</b> |             |
| SE         | 44.5            | 86.3            | 130.8           | 34             | <b>66</b>   |             |
| <b>7</b>   | <b>V Free</b>   | <b>V Buried</b> | <b>V Total</b>  | <b>V Exact</b> |             |             |
|            | 743.1           | 693.2           | 1436.3          | 1436.8         |             |             |
|            | <b>%V_Free</b>  | <b>%V_Bur</b>   | <b>% Tot/Ex</b> |                |             |             |
|            | 51.7            | <b>48.3</b>     | 100             |                |             |             |
|            | <b>Quadrant</b> | <b>V_f</b>      | <b>V_b</b>      | <b>V_t</b>     | <b>%V_f</b> | <b>%V_b</b> |
|            | SW              | 137.6           | 221.4           | 359.1          | 38.3        | <b>61.7</b> |
|            | NW              | 235             | 124             | 359            | 65.5        | <b>34.5</b> |
| NE         | 136.5           | 222.6           | 359             | 38             | <b>62</b>   |             |
| SE         | 233.9           | 125.2           | 359             | 65.1           | <b>34.9</b> |             |

**Table S13:** Calculated buried volume for complex 2<sub>H</sub>.

| Radius [Å] | Buried Volume   |                 |                 |                |             |             |
|------------|-----------------|-----------------|-----------------|----------------|-------------|-------------|
| <b>3.5</b> | <b>V Free</b>   | <b>V Buried</b> | <b>V Total</b>  | <b>V Exact</b> |             |             |
|            | 16.5            | 163.1           | 179.5           | 179.6          |             |             |
|            | <b>%V_Free</b>  | <b>%V_Bur</b>   | <b>% Tot/Ex</b> |                |             |             |
|            | 9.2             | <b>90.8</b>     | 100             |                |             |             |
|            | <b>Quadrant</b> | <b>V_f</b>      | <b>V_b</b>      | <b>V_t</b>     | <b>%V_f</b> | <b>%V_b</b> |
|            | SW              | 4.6             | 40.3            | 44.9           | 10.1        | <b>89.9</b> |
|            | NW              | 3.6             | 41.2            | 44.9           | 8.1         | <b>91.9</b> |
|            | NE              | 4.6             | 40.3            | 44.8           | 10.1        | <b>89.9</b> |
| SE         | 3.7             | 41.2            | 44.9            | 8.1            | <b>91.9</b> |             |
| <b>5</b>   | <b>V Free</b>   | <b>V Buried</b> | <b>V Total</b>  | <b>V Exact</b> |             |             |
|            | 59.8            | 463.5           | 523.3           | 523.6          |             |             |
|            | <b>%V_Free</b>  | <b>%V_Bur</b>   | <b>% Tot/Ex</b> |                |             |             |
|            | 11.4            | <b>88.6</b>     | 99.9            |                |             |             |
|            | <b>Quadrant</b> | <b>V_f</b>      | <b>V_b</b>      | <b>V_t</b>     | <b>%V_f</b> | <b>%V_b</b> |
|            | SW              | 22              | 108.8           | 130.8          | 16.9        | <b>83.1</b> |
|            | NW              | 7.8             | 123             | 130.8          | 6           | <b>94</b>   |
|            | NE              | 22              | 108.7           | 130.8          | 16.9        | <b>83.1</b> |
| SE         | 7.8             | 123             | 130.8           | 6              | <b>94</b>   |             |
| <b>7</b>   | <b>V Free</b>   | <b>V Buried</b> | <b>V Total</b>  | <b>V Exact</b> |             |             |
|            | 619.3           | 817             | 1436.3          | 1436.8         |             |             |
|            | <b>%V_Free</b>  | <b>%V_Bur</b>   | <b>% Tot/Ex</b> |                |             |             |
|            | 43.1            | <b>56.9</b>     | 100             |                |             |             |
|            | <b>Quadrant</b> | <b>V_f</b>      | <b>V_b</b>      | <b>V_t</b>     | <b>%V_f</b> | <b>%V_b</b> |
|            | SW              | 206.4           | 152.6           | 359.1          | 57.5        | <b>42.5</b> |
|            | NW              | 103.2           | 255.8           | 359            | 28.7        | <b>71.3</b> |
|            | NE              | 206.4           | 152.6           | 359            | 57.5        | <b>42.5</b> |
| SE         | 103.2           | 255.8           | 359             | 28.7           | <b>71.3</b> |             |

**Table S14:** Calculated buried volume for complex **3**.

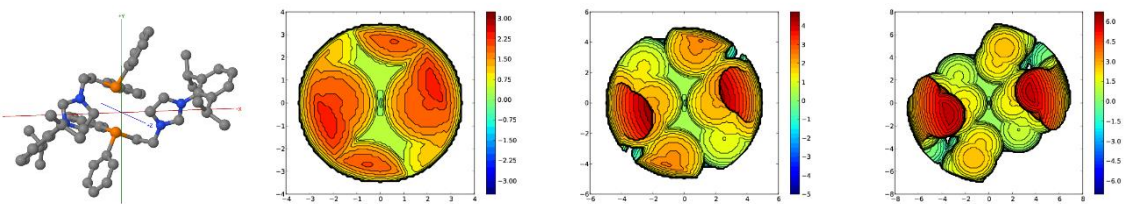

The figure shows the molecular structure of complex 3 on the left. To its right are three isosurface plots representing buried volume at different radii: 3.5 Å (middle), 5 Å (right), and 7 Å (far right). Each plot uses a color scale from blue (negative) to red (positive) to indicate the volume distribution.

| Radius [Å] | Buried Volume   |                 |                 |                |             |             |
|------------|-----------------|-----------------|-----------------|----------------|-------------|-------------|
| <b>3.5</b> | <b>V Free</b>   | <b>V Buried</b> | <b>V Total</b>  | <b>V Exact</b> |             |             |
|            | 35.7            | 143.8           | 179.5           | 179.6          |             |             |
|            | <b>%V_Free</b>  | <b>%V_Bur</b>   | <b>% Tot/Ex</b> |                |             |             |
|            | 19.9            | <b>80.1</b>     | 100             |                |             |             |
|            | <b>Quadrant</b> | <b>V_f</b>      | <b>V_b</b>      | <b>V_t</b>     | <b>%V_f</b> | <b>%V_b</b> |
|            | SW              | 7.4             | 37.5            | 44.9           | 16.4        | <b>83.6</b> |
|            | NW              | 10.3            | 34.6            | 44.9           | 22.9        | <b>77.1</b> |
| NE         | 7.5             | 37.3            | 44.8            | 16.8           | <b>83.2</b> |             |
| SE         | 10.4            | 34.4            | 44.9            | 23.3           | <b>76.7</b> |             |
| <b>5</b>   | <b>V Free</b>   | <b>V Buried</b> | <b>V Total</b>  | <b>V Exact</b> |             |             |
|            | 147.7           | 375.6           | 523.3           | 523.6          |             |             |
|            | <b>%V_Free</b>  | <b>%V_Bur</b>   | <b>% Tot/Ex</b> |                |             |             |
|            | 28.2            | <b>71.8</b>     | 99.9            |                |             |             |
|            | <b>Quadrant</b> | <b>V_f</b>      | <b>V_b</b>      | <b>V_t</b>     | <b>%V_f</b> | <b>%V_b</b> |
|            | SW              | 29.2            | 101.6           | 130.8          | 22.4        | <b>77.6</b> |
|            | NW              | 43.6            | 87.2            | 130.8          | 33.4        | <b>66.6</b> |
| NE         | 30.4            | 100.4           | 130.8           | 23.2           | <b>76.8</b> |             |
| SE         | 44.4            | 86.4            | 130.8           | 33.9           | <b>66.1</b> |             |
| <b>7</b>   | <b>V Free</b>   | <b>V Buried</b> | <b>V Total</b>  | <b>V Exact</b> |             |             |
|            | 687.4           | 748.9           | 1436.3          | 1436.8         |             |             |
|            | <b>%V_Free</b>  | <b>%V_Bur</b>   | <b>% Tot/Ex</b> |                |             |             |
|            | 47.9            | <b>52.1</b>     | 100             |                |             |             |
|            | <b>Quadrant</b> | <b>V_f</b>      | <b>V_b</b>      | <b>V_t</b>     | <b>%V_f</b> | <b>%V_b</b> |
|            | SW              | 112.2           | 246.9           | 359.1          | 31.2        | <b>68.8</b> |
|            | NW              | 229.7           | 129.3           | 359            | 64          | <b>36</b>   |
| NE         | 114.2           | 244.8           | 359             | 31.8           | <b>68.2</b> |             |
| SE         | 231.2           | 127.8           | 359             | 64.4           | <b>35.6</b> |             |

**Table S15:** Calculated buried volume for complex **3<sub>H</sub>**.

| Radius [Å] | Buried Volume   |                 |                 |                |             |             |
|------------|-----------------|-----------------|-----------------|----------------|-------------|-------------|
| <b>3.5</b> | <b>V Free</b>   | <b>V Buried</b> | <b>V Total</b>  | <b>V Exact</b> |             |             |
|            | 19              | 160.5           | 179.5           | 179.6          |             |             |
|            | <b>%V_Free</b>  | <b>%V_Bur</b>   | <b>% Tot/Ex</b> |                |             |             |
|            | 10.6            | <b>89.4</b>     | 100             |                |             |             |
|            | <b>Quadrant</b> | <b>V_f</b>      | <b>V_b</b>      | <b>V_t</b>     | <b>%V_f</b> | <b>%V_b</b> |
|            | SW              | 4.4             | 40.5            | 44.9           | 9.7         | <b>90.3</b> |
|            | NW              | 5.1             | 39.8            | 44.9           | 11.4        | <b>88.6</b> |
|            | NE              | 4.4             | 40.5            | 44.8           | 9.7         | <b>90.3</b> |
| SE         | 5.1             | 39.7            | 44.9            | 11.4           | <b>88.6</b> |             |
| <b>5</b>   | <b>V Free</b>   | <b>V Buried</b> | <b>V Total</b>  | <b>V Exact</b> |             |             |
|            | 47.7            | 475.6           | 523.3           | 523.6          |             |             |
|            | <b>%V_Free</b>  | <b>%V_Bur</b>   | <b>% Tot/Ex</b> |                |             |             |
|            | 9.1             | <b>90.9</b>     | 99.9            |                |             |             |
|            | <b>Quadrant</b> | <b>V_f</b>      | <b>V_b</b>      | <b>V_t</b>     | <b>%V_f</b> | <b>%V_b</b> |
|            | SW              | 14.5            | 116.3           | 130.8          | 11.1        | <b>88.9</b> |
|            | NW              | 9.4             | 121.4           | 130.8          | 7.2         | <b>92.8</b> |
|            | NE              | 14.5            | 116.3           | 130.8          | 11.1        | <b>88.9</b> |
| SE         | 9.3             | 121.5           | 130.8           | 7.1            | <b>92.9</b> |             |
| <b>7</b>   | <b>V Free</b>   | <b>V Buried</b> | <b>V Total</b>  | <b>V Exact</b> |             |             |
|            | 503.4           | 933             | 1436.3          | 1436.8         |             |             |
|            | <b>%V_Free</b>  | <b>%V_Bur</b>   | <b>% Tot/Ex</b> |                |             |             |
|            | 35.0            | <b>65.0</b>     | 100             |                |             |             |
|            | <b>Quadrant</b> | <b>V_f</b>      | <b>V_b</b>      | <b>V_t</b>     | <b>%V_f</b> | <b>%V_b</b> |
|            | SW              | 158.2           | 200.9           | 359.1          | 44          | <b>56</b>   |
|            | NW              | 93.5            | 265.6           | 359            | 26          | <b>74</b>   |
|            | NE              | 158.2           | 200.9           | 359            | 44.1        | <b>55.9</b> |
| SE         | 93.4            | 265.6           | 359             | 26             | <b>74</b>   |             |



## Steric Maps

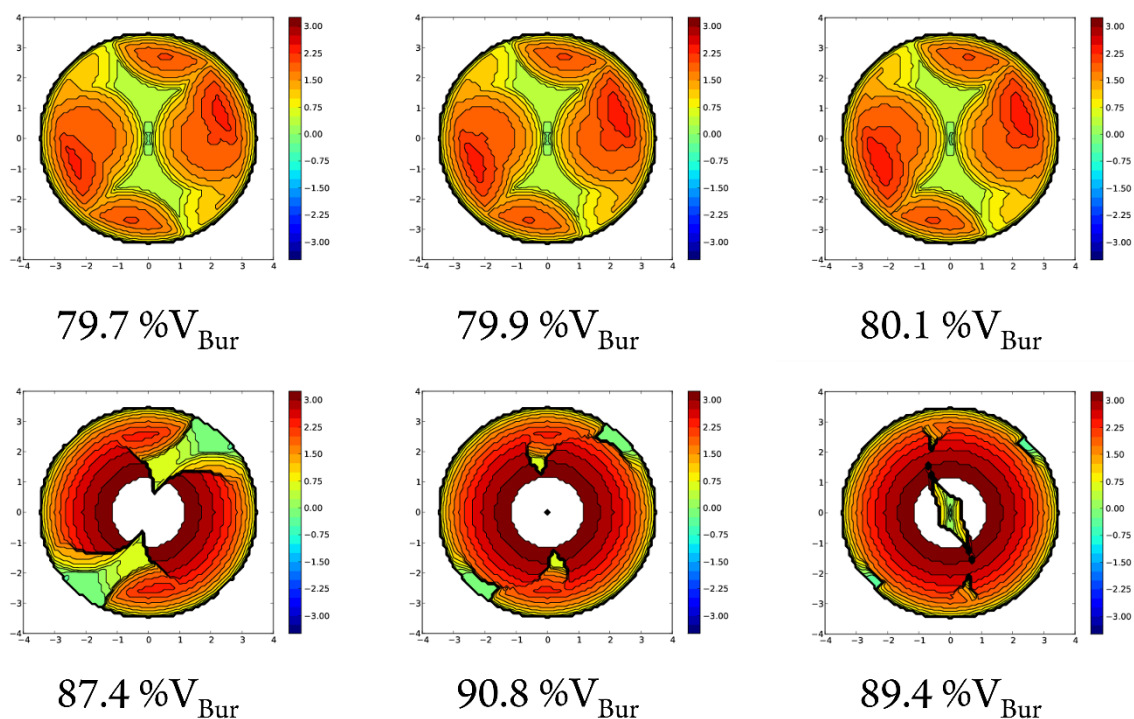

**Figure S54:** Steric maps at 3.5 Å for complexes **1** (top left), **2** (top center) and **3** (top right) as well as their corresponding hydrides **1<sub>H</sub>**, **2<sub>H</sub>** and **3<sub>H</sub>** below. Axes are in Å. The relative values for buried volume are given below each map.

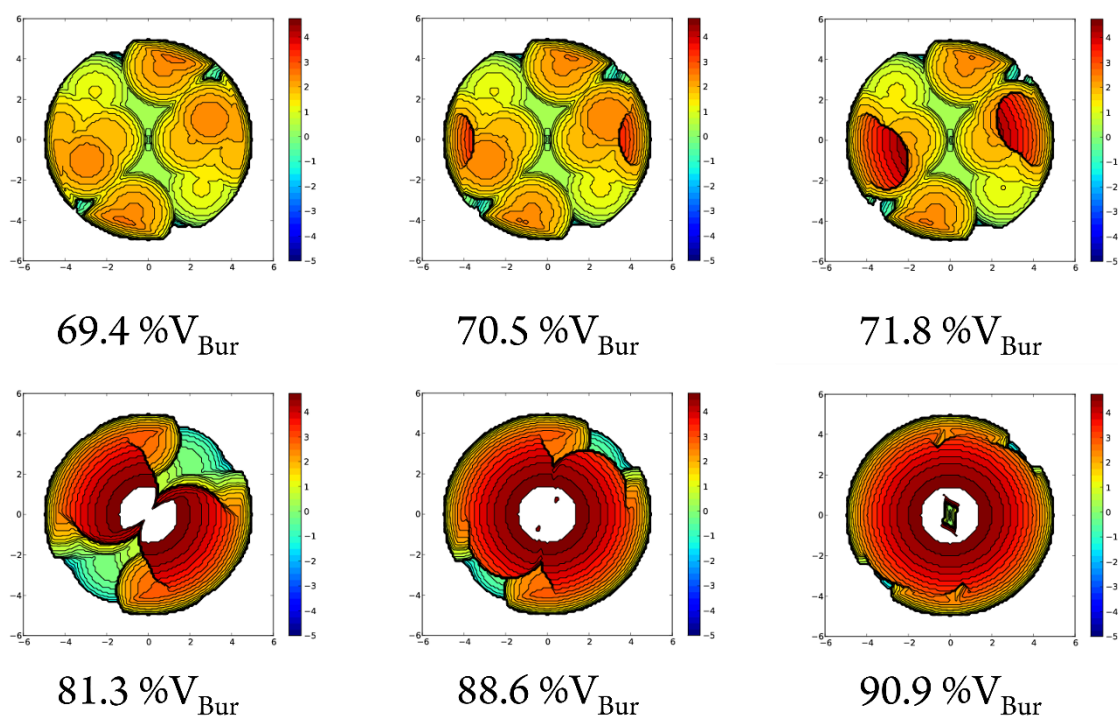

**Figure S55:** Steric maps at 5 Å for complexes **1** (top left), **2** (top center) and **3** (top right) as well as their corresponding hydrides **1<sub>H</sub>**, **2<sub>H</sub>** and **3<sub>H</sub>** below. Axes are in Å. The relative values for buried volume are given below each map.

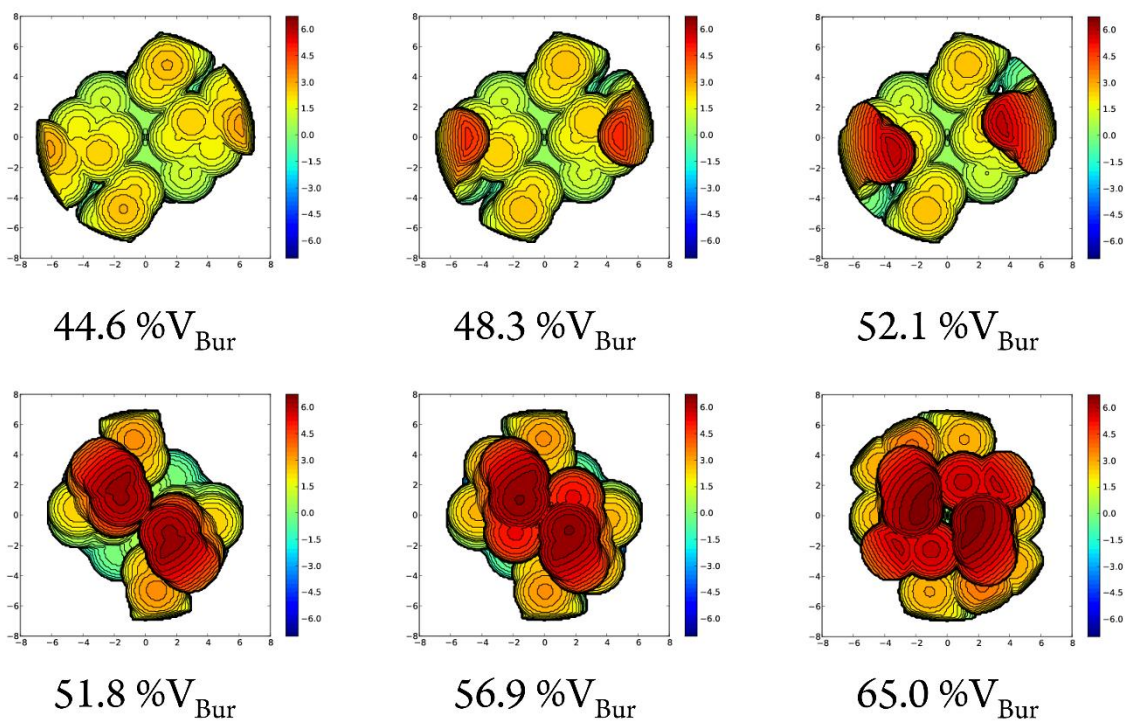

**Figure S56:** Steric maps at 7 Å for complexes **1** (top left), **2** (top center) and **3** (top right) as well as their corresponding hydrides **1<sub>H</sub>**, **2<sub>H</sub>** and **3<sub>H</sub>** below. Axes are in Å. The relative values for buried volume are given below each map.

## Mechanisms

The proposed mechanisms for both TH and *Oppenauer*-type oxidation applying complexes **1**, **2** and **3** are depicted (Figure S57 and S58, respectively). The Ru-bis-aNHC complexes applied in catalysis are technically all singular positive complexes with a bromide counterion (excluded for clarity). As the carbenes “donate” their electrons towards the Ru center, they can formally be considered as positively charged, whilst the acetate ligand has a negative charge. During TH, the complex can directly coordinate to *iso*-propanolate, which acts as hydrogen donor for the reaction. For the *Oppenauer*-type oxidation however, a competing coordination of *tert*-butanolate most likely occurs. This however cannot act as hydrogen donor *via*  $\beta$ -H-elimination so that an exchange with the sterically demanding substrate (in comparison to sterically less demanding *iso*-propanolate during TH) is required. Both active species can undergo a  $\beta$ -H-elimination step and form a mono-hydride as well as the ketone. From here, the mono-hydride species can either follow the catalytic cycle, likely in accordance to the inner-sphere mechanism as proposed by Noyori,<sup>31</sup> or form a di-hydride species which has been shown to be inactive in TH and *Oppenauer*-type oxidation,<sup>3a</sup> representing a deactivation pathway.

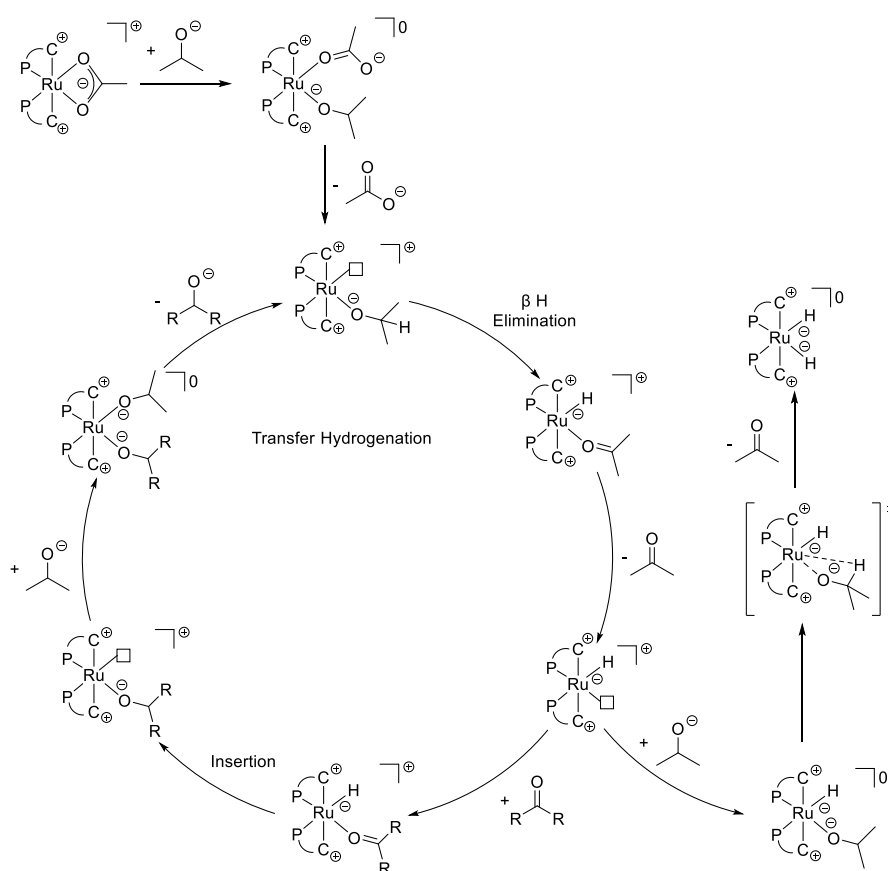

**Figure S57:** Inner-sphere catalytic mechanism for TH as originally proposed by Noyori<sup>31</sup> including additional di-hydride deactivation pathway. Coordination of the 1-(2-diphenylphosphino-ethyl)-3-aryl-imidazolium ligands depicted as P-C and counter ion bromide excluded for clarity. The substrate acetophenone is represented abbreviated as R.

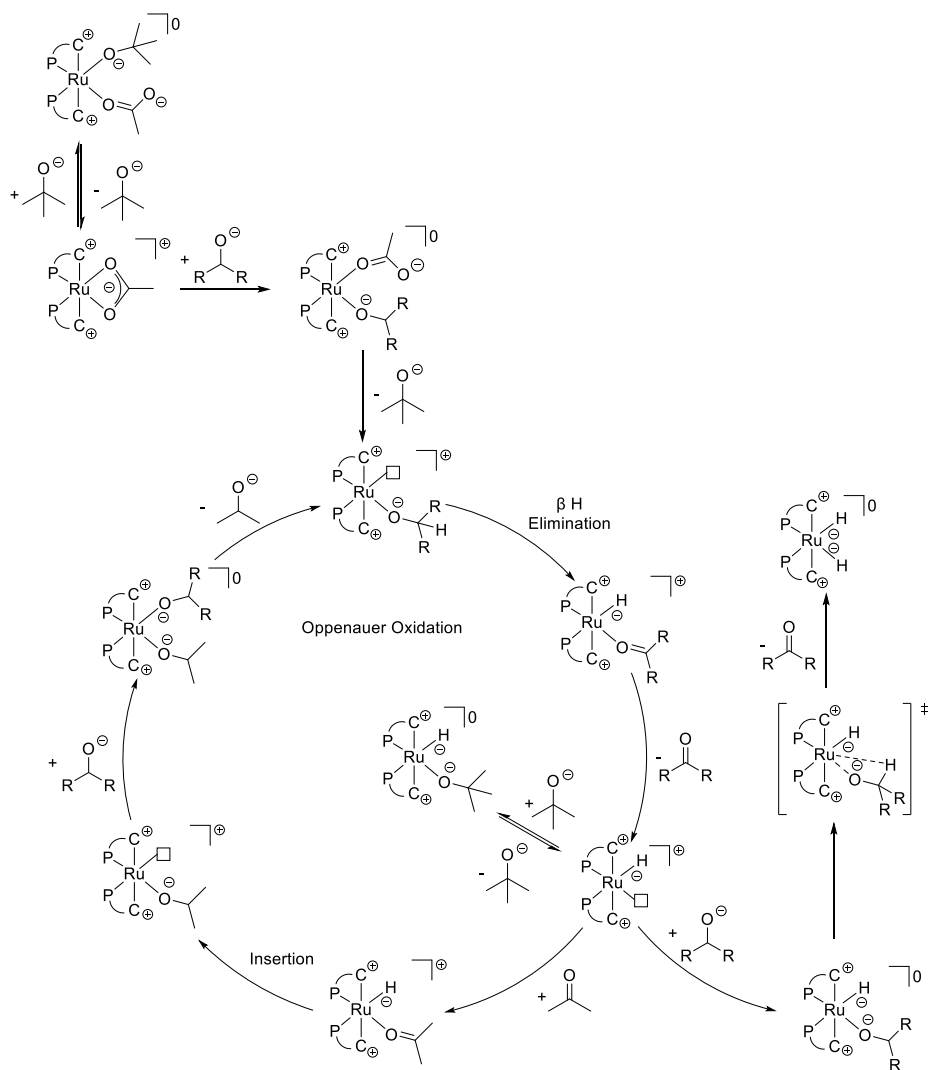

**Figure S58:** Inner-sphere catalytic mechanism for *Oppenauer* type oxidation as originally proposed in by Noyori<sup>31</sup> including additional di-hydride deactivation pathway as well as potential coordination of <sup>t</sup>BuOH solvent. Coordination of the 1-(2-diphenylphosphino-ethyl)-3-aryl-imidazolium ligands depicted as P-C and counter ion bromide excluded for clarity. The substrate  $\alpha$ -tetralol is represented abbreviated as R.

## References

1. Mitchell, R. W.; Spencer, A.; Wilkinson, G., *J Chem Soc Dalton* **1973**, 846-854.
2. Wang, Z.; Zhang, M.; Li, Y. Ionic conductors containing phenyl/biphenyl and hydroxyalkyl as well as preparation method and application of ionic conductors. CN108383794 (A), 2018.
3. (a) Pardatscher, L.; Hofmann, B. J.; Fischer, P. J.; Hölzl, S. M.; Reich, R. M.; Kühn, F. E.; Baratta, W., *ACS Catal.* **2019**, *9*, 11302-11306; (b) Zhao, Y.; Gilbertson, S. R., *Org. Lett.* **2014**, *16*, 1033-1035; (c) Wolf, J.; Labande, A.; Daran, J. C.; Poli, R., *J. Organomet. Chem.* **2006**, *691*, 433-443; (d) Wolf, J.; Labande, A.; Natella, M.; Daran, J. C.; Poli, R., *J Mol Catal a-Chem* **2006**, *259*, 205-212.
4. (a) Liu, J. P.; Chen, J. B.; Zhao, J. F.; Zhao, Y. H.; Li, L.; Zhang, H. B., *Synthesis-Stuttgart* **2003**, 2661-2666; (b) Hameury, S.; de Fremont, P.; Breuil, P. A. R.; Olivier-Bourbigou, H.; Braunstein, P., *Dalton Trans.* **2014**, *43*, 4700-4710.
5. *APEX suite of crystallographic software*, APEX 3, Version 2019-11.0; Bruker AXS Inc.: Madison, Wisconsin, USA, 2019.
6. *SAINT*, Version 8.38A; Bruker AXS Inc.: Madison, Wisconsin, USA, 2017.
7. *SADABS*, Version 2016/2; Bruker AXS Inc.: Madison, Wisconsin, USA, 2016.
8. (a) Sheldrick, G. M., *Acta Cryst. C* **2015**, *71*, 3-8; (b) Hübschle, C. B.; Sheldrick, G. M.; Dittrich, B., *J. Appl. Cryst.* **2011**, *44*, 1281-1284; (c) Sheldrick, G. M., *Acta Cryst. A* **2015**, *71*, 3-8.
9. Wilson, A. J., *International Tables for Crystallography*. Kluwer Academic Publishers: Dordrecht, The Netherlands, 1992; Vol. C.
10. Macrae, C. F.; Sovago, I.; Cottrell, S. J.; Galek, P. T. A.; McCabe, P.; Pidcock, E.; Platings, M.; Shields, G. P.; Stevens, J. S.; Towler, M.; Wood, P. A., *J. Appl. Cryst.* **2020**, *53*, 226-235.
11. Yasar, S.; Cekirdek, S.; Ozdemir, I., *J. Coord. Chem.* **2014**, *67*, 1236-1248.
12. Viji, M.; Tyagi, N.; Naithani, N.; Ramaiah, D., *New. J. Chem.* **2017**, *41*, 12736-12745.
13. Hollering, M.; Albrecht, M.; Kühn, F. E., *Organometallics* **2016**, *35*, 2980-2986.
14. Kleinhans, G.; Guisado-Barrios, G.; Peris, E.; Bezuidenhout, D. I., *Polyhedron* **2018**, *143*, 43-48.
15. Witt, J.; Pöthig, A.; Kühn, F. E.; Baratta, W., *Organometallics* **2013**, *32*, 4042-4045.
16. Almeida, M. L. S.; Beller, M.; Wang, G. Z.; Bäckvall, J. E., *Chem. Eur. J.* **1996**, *2*, 1533-1536.
17. Mukherjee, A.; Bhattacharya, S., *RSC Adv.* **2021**, *11*, 15617-15631.
18. Saleem, F.; Rao, G. K.; Kumar, S.; Singh, M. P.; Singh, A. K., *Dalton Trans.* **2015**, *44*, 19141-19152.
19. Wang, Q.; Du, W.; Liu, T.; Chai, H.; Yu, Z., *Tetrahedron Lett.* **2014**, *55*, 1585-1588.
20. Gauthier, S.; Scopelliti, R.; Severin, K., *Organometallics* **2004**, *23*, 3769-3771.
21. Manzini, S.; Urbina-Blanco, C. A.; Nolan, S. P., *Organometallics* **2013**, *32*, 660-664.
22. Frisch, M. J.; Trucks, G. W.; Schlegel, H. B.; Scuseria, G. E.; Robb, M. A.; Cheeseman, J. R.; Scalmani, G.; Barone, V.; Petersson, G. A.; Nakatsuji, H.; Li, X.; Caricato, M.; Marenich, A. V.; Bloino, J.; Janesko, B. G.; Gomperts, R.; Mennucci, B.; Hratchian, H. P.; Ortiz, J. V.; Izmaylov, A. F.; Sonnenberg, J. L.; Williams; Ding, F.; Lipparini, F.; Egidi, F.; Goings, J.; Peng, B.; Petrone, A.; Henderson, T.; Ranasinghe, D.; Zakrzewski, V. G.; Gao, J.; Rega, N.; Zheng, G.; Liang, W.; Hada, M.; Ehara, M.; Toyota, K.; Fukuda, R.; Hasegawa, J.; Ishida, M.; Nakajima, T.; Honda, Y.; Kitao, O.; Nakai, H.; Vreven, T.; Throssell, K.; Montgomery Jr., J. A.; Peralta, J. E.; Ogliaro, F.; Bearpark, M. J.; Heyd, J.

- J.; Brothers, E. N.; Kudin, K. N.; Staroverov, V. N.; Keith, T. A.; Kobayashi, R.; Normand, J.; Raghavachari, K.; Rendell, A. P.; Burant, J. C.; Iyengar, S. S.; Tomasi, J.; Cossi, M.; Millam, J. M.; Klene, M.; Adamo, C.; Cammi, R.; Ochterski, J. W.; Martin, R. L.; Morokuma, K.; Farkas, O.; Foresman, J. B.; Fox, D. J. *Gaussian 16 Rev. B.01*, Wallingford, CT, 2016.
23. Dennington, R.; Keith, T. A.; Milliam, J. M. *GaussView, Version 6.0.16*, Semichem Inc.: Shawnee Missions, KS, 2016.
  24. Grimme, S.; Ehrlich, S.; Goerigk, L., *J. Comput. Chemie* **2011**, *32*, 1456-1465.
  25. (a) Weigend, F., *Phys. Chem. Chem. Phys.* **2006**, *8*, 1057-1065; (b) Weigend, F.; Ahlrichs, R., *Phys. Chem. Chem. Phys.* **2005**, *7*, 3297-3305.
  26. Bergner, A.; Dolg, M.; Küchle, W.; Stoll, H.; Preuß, H., *Mol. Phys.* **1993**, *80*, 1431-1441.
  27. Poater, A.; Ragone, F.; Giudice, S.; Costabile, C.; Dorta, R.; Nolan, S. P.; Cavallo, L., *Organometallics* **2008**, *27*, 2679-2681.
  28. Poater, A.; Ragone, F.; Mariz, R.; Dorta, R.; Cavallo, L., *Chem. Eur. J.* **2010**, *16*, 14348-14353.
  29. Poater, A.; Cosenza, B.; Correa, A.; Giudice, S.; Ragone, F.; Scarano, V.; Cavallo, L., *Eur. J. Inorg. Chem.* **2009**, *2009*, 1759-1766.
  30. Falivene, L.; Cao, Z.; Petta, A.; Serra, L.; Poater, A.; Oliva, R.; Scarano, V.; Cavallo, L., *Nat. Chem.* **2019**, *11*, 872-879.
  31. Noyori, R.; Hashiguchi, S., *Acc. Chem. Res.* **1997**, *30*, 97-102.

### Author Contributions

Alexander D. Böth: Synthesis, computational chemistry, catalysis, manuscript preparation;  
Michael J. Sauer: X-ray diffraction measurements/analysis; Walter Baratta: Project design and experimental strategy planning; Fritz E. Kühn: Project design and controlling.
